# Supplementary material for: Chemically recyclable polyesters from CO2, H2, and 1,3-butadiene
Source: PubMed Central journal article supplement — Innovation (Camb). 2022 Feb 5;3(2):100216. doi: 10.1016/j.xinn.2022.100216 (PMC8881707; doi:10.1016/j.xinn.2022.100216), 2022-02-05
Supplement: mmc2.pdf [file mmc2.pdf]

# Chemically recyclable polyesters from CO<sub>2</sub>, H<sub>2</sub>, and 1,3-butadiene

Yongjia Lou,<sup>1</sup> Luyan Xu,<sup>1</sup> Ninglin Gan,<sup>1</sup> Yunyan Sun,<sup>1</sup> and Bo-Lin Lin<sup>1,\*</sup>

\*Correspondence: [linbl@shanghaitech.edu.cn](mailto:linbl@shanghaitech.edu.cn)

Received: November 8, 2021; Accepted: February 2, 2022; Published Online: February 5, 2022; <https://doi.org/10.1016/j.xinn.2022.100216>

© 2022 The Author(s). This is an open access article under the CC BY-NC-ND license (<http://creativecommons.org/licenses/by-nc-nd/4.0/>).

## GRAPHICAL ABSTRACT

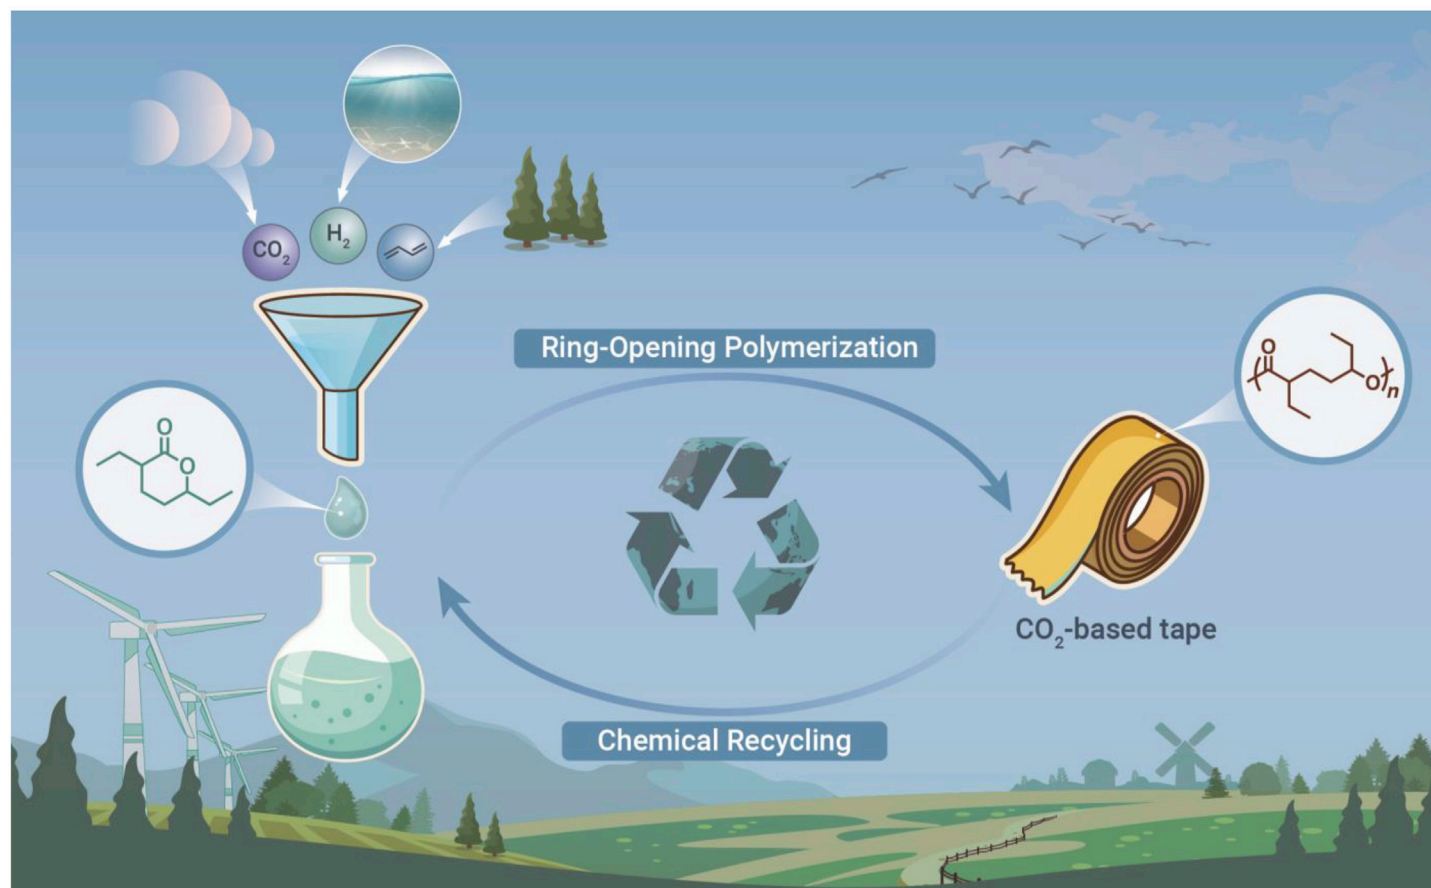

## PUBLIC SUMMARY

- CO<sub>2</sub>-based recyclable polymers are promising in reducing CO<sub>2</sub> emission and pollution
- Disubstituted  $\delta$ -lactone, a previously non-polymerizable monomer, was polymerized
- Complete monomer recovery was successfully achieved via chemical recycling process
- CO<sub>2</sub> constitutes 28% of the weight of newly designed chemically recyclable polymers
- The polymers show pressure-sensitive adhesive property comparable to commercial tapes

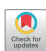

# Chemically recyclable polyesters from CO<sub>2</sub>, H<sub>2</sub>, and 1,3-butadiene

Yongjia Lou,<sup>1</sup> Luyan Xu,<sup>1</sup> Ninglin Gan,<sup>1</sup> Yunyan Sun,<sup>1</sup> and Bo-Lin Lin<sup>1,\*</sup>

<sup>1</sup>School of Physical Science and Technology, ShanghaiTech University, Shanghai 201210, China

\*Correspondence: linbl@shanghaitech.edu.cn

Received: November 8, 2021; Accepted: February 2, 2022; Published Online: February 5, 2022; <https://doi.org/10.1016/j.xinn.2022.100216>

© 2022 The Author(s). This is an open access article under the CC BY-NC-ND license (<http://creativecommons.org/licenses/by-nc-nd/4.0/>).

Citation: Lou Y., Xu L., Gan N., et al., (2022). Chemically recyclable polyesters from CO<sub>2</sub>, H<sub>2</sub>, and 1,3-butadiene. *The Innovation* 3(2), 100216.

Chemically recyclable solid polymeric materials with commercializable properties only using CO<sub>2</sub> and inexpensive bulk chemicals as chemical feedstock can open a brand-new avenue to economically viable, large-scale fixation of CO<sub>2</sub> over a long period of time. Despite previous great advancements, development of such a kind of CO<sub>2</sub>-based polymers remains a long-term unsolved research challenge of great significance. Herein, we reported the first methodology to polymerize six-membered lactone with two substituents vicinal to the ester group (HL), a compound previously found to be non-polymerizable. The present methodology enables the first synthesis of chemically recyclable solid polyesters (polyHL) with a high CO<sub>2</sub> content (28 wt %) and large molecular weights ( $M_n$  up to 613.8 kg mol<sup>-1</sup>). Transparent membranes with promising pressure-sensitive adhesive (PSA) properties comparable with their commercial counterparts can be conveniently fabricated from the polyesters. Mechanistic studies indicate that rigorous removal of water impurity is the key to the successful polymerization of the relatively inert disubstituted six-membered lactone. A complete monomer recovery from polyHL was also successfully achieved under mild catalytic conditions. The synthesis of polyHL only requires CO<sub>2</sub> and two inexpensive bulk chemicals, H<sub>2</sub> and 1,3-butadiene, as the starting materials, thus providing a new strategy for potential scalable chemical utilization of CO<sub>2</sub> with desirable economic values and concomitant mitigation of CO<sub>2</sub> emissions. This work should inspire future research to make useful new solid CO<sub>2</sub>-based polymers that can meaningfully increase the scale of chemical utilization of CO<sub>2</sub> and promote the contribution of chemical utilization of CO<sub>2</sub> to global mitigation of CO<sub>2</sub> emissions.

## INTRODUCTION

The scale of annual global production of synthetic polymers, mostly carbonaceous solid materials, is ca. 0.4 gigaton currently and is projected to reach ca. 1.2 gigaton in 2050.<sup>1</sup> Utilization of CO<sub>2</sub> as a main chemical feedstock to synthesize commercial solid polymers has great potentials in mitigation of CO<sub>2</sub> emissions.<sup>2</sup> To date, however, only ca. 0.001 gigaton of CO<sub>2</sub> has been used as a chemical feedstock in the production of commercial CO<sub>2</sub>-based polymers, primarily polycarbonates and polyols.<sup>3,4</sup> Thus, development of scalable new CO<sub>2</sub>-based polymers represents a significant challenge in the area of mitigating CO<sub>2</sub> emissions.

We reason that three requirements should be met to achieve large-scale production of new CO<sub>2</sub>-based polymers. Firstly, the co-feedstock to synthesize the polymers should be inexpensive bulk chemicals in order to meet both economic and scalable requirements. Secondly, the polymers can also be conveniently processed into desirable solid shapes with commercializable properties. Finally, to address the aggravating pollution issues from increasing polymer wastes, the polymers should be recyclable. Unfortunately, CO<sub>2</sub>-based polymers satisfying all the three requirements, which can potentially fix large-scale CO<sub>2</sub> in solid polymeric materials for a long period of time, are still unprecedented.

Polymers containing heteroatoms in their backbones,<sup>5–7</sup> especially polyesters,<sup>8–10</sup> featured with readily cleavable carboxylic ester backbone linkages, are excellent candidates for recycling. Therefore, making new polyesters from CO<sub>2</sub> and cheap bulk chemicals as co-feedstocks, especially large-volume olefins, such as ethylene and 1,3-butadiene, that can be derived from biomass, has long been pursued over the past several decades.<sup>11–16</sup> Although ester-containing solid polyolefins from CO<sub>2</sub> and 1,3-butadiene have been previously achieved in multiple-step fashions, the lack of processability, commercializable properties, and recyclability limits its potential large-scale utilization.<sup>14,15,17,18</sup>

Herein, we report the first successful synthesis of polyesters using only CO<sub>2</sub> and cheap bulk chemicals as the co-feedstock (Figure 1). The synthe-

sis was achieved via ring-opening polymerization (ROP) of an intermediate derived from CO<sub>2</sub>, H<sub>2</sub>, and 1,3-butadiene—a diethyl-substituted six-membered lactones (HL) that was previously thought to be non-polymerizable.<sup>16</sup> Solid polyesters with high molecular weight (MW) ( $M_n$  up to 613.8 kg mol<sup>-1</sup>) and high CO<sub>2</sub> content (28 wt %) were obtained. Remarkably, the polyesters can be conveniently processed into transparent and flexible membranes with pressure-sensitive adhesive (PSA) properties comparable with their commercial counterparts. A series of catalytic methods were also developed for clean chemical recycling of the polyesters back to their starting monomer HL.

## RESULTS

### Methodology development for the synthesis of polyesters from CO<sub>2</sub>, H<sub>2</sub>, and 1,3-butadiene

As shown in Figure 1, a two-step palladium-catalyzed procedure was used to synthesize HL from CO<sub>2</sub>, H<sub>2</sub>, and 1,3-butadiene according to the literature.<sup>19,20</sup> The resultant HL is a 63/37 diastereomeric mixture according to various NMR spectroscopies (Figures S1–S4). To generate polyHL through ROP of HL, catalysts including tin(II)2-ethylhexanoate [Sn(Oct)<sub>2</sub>] and dibutyltin dilaurate (DBTDL) associated with benzyl alcohol (BnOH) were initially attempted at varied conditions ([HL]/[Cat.]/[BnOH] = 40/1/1 or 40/0.5/1 at different temperatures), but no polymer was obtained (Table S1, runs 1–4). Then diphenyl phosphate (DPP) was also employed, but no reaction was detected either (Table S1, runs 5–7, [HL]/[DPP]/[BnOH] = 30/1/1 at –25°C, 25°C, and 80°C in bulk for 24 h, respectively). Subsequently, organic bases, such as 1,8-diazabicyclo[5.4.0]undec-7-ene and 1,5,7-triazabicyclo[4.4.0]dec-5-ene (TBD), were tested at a ratio of [HL]/[Cat.]/[BnOH] = 40/1/1 at 30°C for 96 h in tetrahydrofuran (THF) (Table S1, runs 8–13). Upon numerous experimental trials, we found that TBD/BnOH can catalyze the ROP of HL at room temperature in bulk or THF after 96 h, resulting in liquid polyHL with moderate conversion (Table S1, run 9: Conv. = 54%,  $M_n$  = 6,010 g mol<sup>-1</sup>,  $\bar{D}$  = 1.14; run 10: Conv. = 37%,  $M_n$  = 5,596 g mol<sup>-1</sup>,  $\bar{D}$  = 1.18, respectively).

Subsequently, we conjectured that increasing the basicity of the organocatalyst might promote the polymerization reactivity. Thus, three common phosphazene bases (PBs) in association with BnOH were investigated. For a 50/1 ratio of [HL]/[BnOH] with 1 mol % of <sup>t</sup>Bu-P<sub>1</sub> (*tert*-butyliminotris(dimethylamino)phosphorane) or <sup>t</sup>Bu-P<sub>2</sub> (1-*tert*-butyl-2,2,4,4,4-pentakis(dimethylamino)-2λ<sup>5</sup>,4λ<sup>5</sup>-catenadi(phosphazene)) at –25°C in THF ([HL]<sub>0</sub> = 5.3 M), no polymer was obtained for <sup>t</sup>Bu-P<sub>1</sub> after 72 h (Table 1, run 1), whereas a 41% conversion was observed for <sup>t</sup>Bu-P<sub>2</sub> after 120 h (Table 1, run 2;  $M_n$  = 5,304 g mol<sup>-1</sup>,  $\bar{D}$  = 1.07). Encouragingly, the ROP process was dramatically improved when <sup>t</sup>Bu-P<sub>4</sub> (1-*tert*-butyl-4,4,4-tris(dimethylamino)-2,2-bis[tris(dimethylamino)phosphoranyl]idene-namino]-2λ<sup>5</sup>,4λ<sup>5</sup>-catenadi(phosphazene)) was employed, leading to 87% conversion after 12 h (Table 1, run 3). Corresponding polyHL with  $M_n$  = 19,880 g mol<sup>-1</sup> and moderate  $\bar{D}$  = 1.90 was obtained. The difference in catalytic reactivities might be a consequence of the large basic differences among the three PBs<sup>21</sup> ( $pK_a$  = 26.9, 33.5, and 42.7 in acetonitrile<sup>22</sup> for <sup>t</sup>Bu-P<sub>1</sub>, <sup>t</sup>Bu-P<sub>2</sub>, and <sup>t</sup>Bu-P<sub>4</sub>, respectively). Next, altering the <sup>t</sup>Bu-P<sub>4</sub> loading from 2 mol % to 0.2 mol % led to a much more controlled polymerization (Table 1, runs 4–7). Particularly, polyHL with  $M_n$  = 9,154 g mol<sup>-1</sup> and a much narrower  $\bar{D}$  = 1.09 was obtained when the <sup>t</sup>Bu-P<sub>4</sub> loading was reduced to 0.2 mol % (Table 1, run 7), suggesting a living polymerization behavior. However, as the system was gradually diluted ([HL]<sub>0</sub> = 2.0, 1.6 and 1.3 M in THF), the ROP of HL became less controlled: the conversion and  $M_n$  were significantly decreased, along with a broader  $\bar{D}$  (Table 1, runs 8–10). Besides, elevating the reaction temperature from –25°C to 41°C also led to a less controlled polymerization (Table 1, runs 11–13). It should be emphasized that very careful drying of all reaction agents is a prerequisite for the success of the ROP methodology in our hands. In the

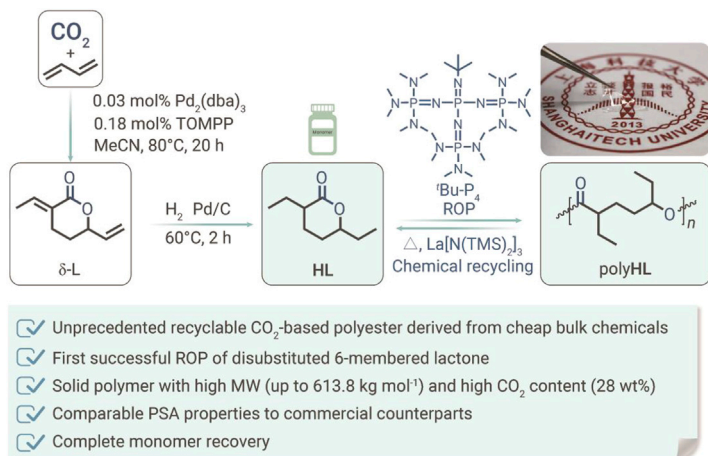

**Figure 1. Synthesis of the first chemically recyclable polyester using only CO<sub>2</sub> and cheap bulk chemicals as the starting materials**

absence of drying, no polymerization was detected even using highly active catalysts, including PBs (Table S11, run 1, condition:  $[\text{HL}]/[\text{tBu-P}_4]/[\text{BnOH}] = 40/1/0$ ,  $[\text{HL}]_0 = 5.3 \text{ M}$  in THF at  $-25^\circ\text{C}$  for 12 h).

To verify the living polymerization behavior, the ROP of HL at a feed ratio of  $[\text{HL}]/[\text{tBu-P}_4]/[\text{BnOH}] = 50/0.1/1$  at  $-25^\circ\text{C}$  in THF was further investigated (Table S2). The polymerization kinetics data strongly support that the polymerization is living: the monomer conversion grows linearly with the reaction time (Figure 2A); the  $\ln[M]_0/[M]$  versus time plot showed a clear first-order kinetic character relative to the monomer concentration  $[M]$  (Figure 2B); a linear correlation of the  $M_n$  of polyHL with the monomer conversion was observed, and the dispersity  $\mathcal{D}$  of the obtained polyHL remained low ( $\mathcal{D} \sim 1.1$ ) during the chain propagation stage (Figure 2C). In addition, the GPC curves for polyHL obtained at varied times were all confirmed to be unimodal (Figure 2D). In addition, the  $M_n$  of the resultant polymers increased linearly with increased  $[\text{HL}]/[\text{BnOH}]$  ratio, and the  $\mathcal{D}$  of the polymers remained low, which further confirmed the living polymerization behavior (Table 1, runs 14 and 15).

Matrix-assisted laser desorption/ionization time-of-flight mass spectrometry (MALDI-TOF MS) was carried out to interrogate the chain-end fidelity of the resultant polyHL produced at a feed ratio of  $[\text{HL}]/[\text{tBu-P}_4]/[\text{BnOH}] = 25/0.1/1$  at  $-25^\circ\text{C}$  in THF. The MS signals of polyHL (Table 1, run 14) showed only one group of molecular ion peaks with the same spacing of  $156.1 \text{ g mol}^{-1}$  ( $M_n = n \cdot 156.1 + 131.5$ ), which could be assigned to the linear-polyHL initiated by BnOH (Figure 3A). The NMR spectroscopies showed that both the methylene signal of  $\text{BnO}^-$  ( $\delta$  5.12 ppm) and methine signal ( $\delta$  3.49 ppm) next to the hydroxyl end group were observed in the  $^1\text{H}$  NMR spectrum, and corresponding  $^{13}\text{C}$  NMR signals were also detected (Figures 3B and S5).

Inspired by the excellent chain-end fidelity of polyHL sample, telechelic polyHL catalyzed by  $^t\text{Bu-P}_4$  and 1,4-benzenedimethanol (1,4-BDM) was obtained at a feed ratio of  $[\text{HL}]/[\text{tBu-P}_4]/[1,4\text{-BDM}] = 15/0.15/1$ . MALDI-TOF MS signals showed only one group of molecular ion peaks ( $M_n = n \cdot 156.1 + 161.1$ ), which perfectly matched the expected telechelic polymer structure (Figure S6).

### Mechanistic studies for the ROP of HL to polyHL

To investigate the possible mechanism in our system, ROPs at a feed ratio of  $[\text{HL}]/[\text{BnOH}] = 50/1$  with varied loadings of  $^t\text{Bu-P}_4$  (2, 1, 0.5, 0.4, and 0.2 mol %; Table 1, runs 3–7) were performed. Notably, the  $M_n$  of the polyHL produced increased significantly as the loading of  $^t\text{Bu-P}_4$  increased, and the trends of bimodal distribution of the GPC traces have become more apparent as the  $^t\text{Bu-P}_4$  loading increased, which might be due to the existence of other competitive initiation mechanisms (Figure S7). MALDI-TOF spectrum of low MW analogs catalyzed by 1 mol % of  $^t\text{Bu-P}_4$  disclosed three sets of molecular ion peaks with the same MW spacing of  $156 \text{ g mol}^{-1}$ . The signals were assignable to BnOH end-capped, with no chain end, and water end-capped polyHL (Figure S8), respectively. As the  $^t\text{Bu-P}_4$  loading increased to 2 mol % relative to HL, the major signal set changed from BnOH chain end to no chain end, and the observed MW increased significantly, and the signals of the oligomers initiated by residual water became negligible (Figure S9).

We next investigated the feasibility for PBs to directly catalyze the ROP of HL without the addition of any alcohol initiator. The ROP reactions were carried out at  $-25^\circ\text{C}$  in THF with 2 mol % of  $^t\text{Bu-P}_1$ ,  $^t\text{Bu-P}_2$ , and  $^t\text{Bu-P}_4$  (Table S3, run 1–3). After 12 h of reaction, no polymer was generated for  $^t\text{Bu-P}_1$  and  $^t\text{Bu-P}_2$ . To our surprise, maximum conversion of 88% was achieved for  $^t\text{Bu-P}_4$  after 12 h and a solid polyHL sample with unexpected ultrahigh MW of  $M_n = 613.8 \text{ kg mol}^{-1}$  and moderate  $\mathcal{D} = 1.45$  was obtained (Table S3, run 3). Adjusting the concentrations of phosphazene base only had small effects on  $M_n$  and  $\mathcal{D}$  of the polyHL samples (Table S3, runs 4–6).

To test the controllability of the ROP of HL catalyzed by  $^t\text{Bu-P}_4$  alone, kinetic experiments were performed at  $-25^\circ\text{C}$  in THF ( $[\text{HL}]/[\text{tBu-P}_4] = 50/1$ ,  $[M]_0 = 4.0 \text{ M}$ ) (Figure S10; Table S4). The  $\ln[M]_0/[M]$  versus time plot revealed that the monomer conversion achieved up to 63% in 4 h, then the polymerization rate tended to slow down and the conversion reached 84% in the subsequent 6–8 h (Figures S10A and S10B). Notably, the  $M_n$  of polyHL has a clear linear correlation with the monomer conversion throughout the polymerization process, but the dispersity  $\mathcal{D}$  significantly broadened after half monomer conversion (Figure S10C). The GPC curves also exhibited a gradually emerging bimodal distribution, presumably due to inevitable transesterification reactions at higher monomer conversion (Figure S10D). These data indicated that relatively controlled ROP manners could be realized at which the reactions were quenched within the first 4 h.

MALDI-TOF spectrum for polyHL generated by  $^t\text{Bu-P}_4$  alone only showed one set of mass peaks assignable to cyclic-polyHL mass peak (Figure S11). No characteristic signals of chain end could be seen in the  $^1\text{H}$  and  $^{13}\text{C}$  NMR spectra either, further supporting the idea that the polymer obtained might have cyclic components (Figures S12 and S13). Notably, high abundance of water-initiated signals could only be detected by MALDI-TOF when the residual water was deliberately reserved in the ROP system (Figure S14).

The topologies of putative cyclic- and linear-polyHLs were further studied by intrinsic viscosity measurements. According to the Mark-Houwink plot (Figure S15), the ratio of  $[\eta]_{\text{cyclic}}/[\eta]_{\text{linear}}$  was estimated to be 0.79, which is slightly higher than the theoretically predicted value.<sup>10,23</sup> This phenomenon might be attributed to the presence of minor linear-polyHL in the putative cyclic products. Besides, the Mark-Houwink exponent  $\alpha$  values were 0.70 for cyclic-polyHL and 0.72 for linear-polyHL, suggesting that both polymers were random coils in THF solution.

Plausible chain initiation mechanisms for ROP of HL catalyzed by  $^t\text{Bu-P}_4/\text{BnOH}$  and  $^t\text{Bu-P}_4$  alone were studied through NMR spectroscopy. Monitoring the stoichiometric reaction between  $^t\text{Bu-P}_4$  and BnOH at RT in  $^1\text{H}$  NMR exhibited the formation of complex  $[\text{tBu-P}_4\text{H}^+ \cdots \text{OBn}]$ . The disappearance of the hydroxyl proton signal at  $\delta$  0.92 ppm and chemical shift changes of  $^t\text{Bu-P}_4$  and BnOH were also observed (Figure S16). In addition, *in situ* NMR tests were performed to gain further mechanistic evidence. By lowering the ratio of HL/BnOH to 1/1, the dominant product observed is consistent with the ring-opened intermediate generated in the initiation step (Figure 5, path 2, and Figure S17). In contrast, only a trace amount of  $\text{BnO}^-$  was observed (Figure S17). These results suggest that chain propagation is slower than the initiation step, thus leading to the accumulation of the initial intermediate with only one repeat unit. The disfavored ring-opening steps might be attributable to the increased steric hindrance surrounding the proposed propagating secondary alkoxides relative to the initiating primary  $\text{BnO}^-$ .

Subsequently, the ability of  $^t\text{Bu-P}_4$  to extract an acidic H from HL was also verified. HL and  $^t\text{Bu-P}_4$  were mixed at ratios of 1/1, 2/1, 4/1, and 8/1, respectively, in a J-Young tube with added toluene- $d_6$  at RT (no polymerization occurred under these conditions), and corresponding  $^1\text{H}$  and  $^{31}\text{P}$  NMR spectra were taken after sufficient oscillations (Figures S18–S20). Characteristic signals of  $[\text{tBu-P}_4\text{H}^+]$  ( $\delta$  7.92–8.07 ppm  $^1\text{H}$  NMR;  $\delta$  12.48 ppm and  $-23.64$  ppm in  $^{31}\text{P}$  NMR) were clearly observed. However, as the HL/ $^t\text{Bu-P}_4$  feed ratio increased, the intensity of the  $[\text{tBu-P}_4\text{H}^+]$  signals increased slightly. Meanwhile, the characteristic signals of  $^t\text{Bu-P}_4$  ( $\delta$  1.72, 2.70, and 2.72 ppm in  $^1\text{H}$  NMR;  $\delta$  4.96 and  $-25.31$  ppm in  $^{31}\text{P}$  NMR) remained unchanged; that is,  $^t\text{Bu-P}_4$  could not be fully consumed even in the presence of a great excess of HL. These data clearly indicated that  $^t\text{Bu-P}_4$  was only able to deprotonate a tiny portion of HL, which might account for the lack of direct correlation between  $^t\text{Bu-P}_4$  concentration and the  $M_n$  of cyclic-polyHL produced in this system (*vide supra*).

Density functional theory (DFT) calculations indicate that deprotonation of the acidic HL monomer at the  $\alpha$  position to generate the  $[\text{>C}^-\text{C}(\text{O})\text{-O-R}]$  carbanion species is preferred over  $\delta$ -H abstracted alkyl anion  $[\text{>C}^-\text{O-C}(\text{O})\text{-R}]$  (Table S13;

**Table 1.** Results of ROP of **HL** by phosphazene bases/BnOH systems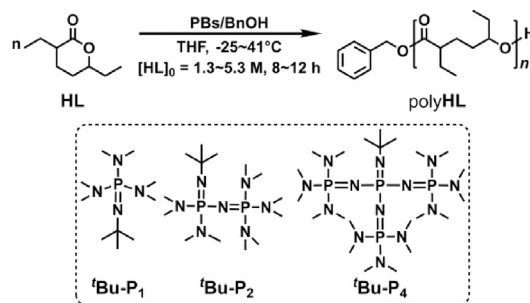

| Run | HL/Catalyst/BnOH | Catalyst                       | Temp. (°C) | Time (h) | [HL] <sub>0</sub> (mol L <sup>-1</sup> ) | Conv. <sup>a</sup> (%) | M <sub>n, cal</sub> <sup>b</sup> (g mol <sup>-1</sup> ) | M <sub>n</sub> <sup>c</sup> (g mol <sup>-1</sup> ) | Đ <sup>c</sup> |
|-----|------------------|--------------------------------|------------|----------|------------------------------------------|------------------------|---------------------------------------------------------|----------------------------------------------------|----------------|
| 1   | 50/0.5/1         | <sup>t</sup> Bu-P <sub>1</sub> | -25        | 72       | 5.3                                      | ND                     | –                                                       | –                                                  | –              |
| 2   | 50/0.5/1         | <sup>t</sup> Bu-P <sub>2</sub> | -25        | 120      | 5.3                                      | 41                     | 3,308                                                   | 5,304                                              | 1.07           |
| 3   | 50/0.5/1         | <sup>t</sup> Bu-P <sub>4</sub> | -25        | 12       | 5.3                                      | 87                     | 6,899                                                   | 19,880                                             | 1.90           |
| 4   | 50/1/1           | <sup>t</sup> Bu-P <sub>4</sub> | -25        | 12       | 5.3                                      | 88                     | 6,977                                                   | 18,921                                             | 1.69           |
| 5   | 50/0.25/1        | <sup>t</sup> Bu-P <sub>4</sub> | -25        | 12       | 5.3                                      | 88                     | 6,977                                                   | 13,116                                             | 1.35           |
| 6   | 50/0.2/1         | <sup>t</sup> Bu-P <sub>4</sub> | -25        | 12       | 5.3                                      | 88                     | 6,977                                                   | 12,885                                             | 1.23           |
| 7   | 50/0.1/1         | <sup>t</sup> Bu-P <sub>4</sub> | -25        | 8        | 5.3                                      | 88                     | 6,977                                                   | 9,154                                              | 1.09           |
| 8   | 50/0.1/1         | <sup>t</sup> Bu-P <sub>4</sub> | -25        | 12       | 2.0                                      | 67                     | 5,338                                                   | 6,888                                              | 1.74           |
| 9   | 50/0.1/1         | <sup>t</sup> Bu-P <sub>4</sub> | -25        | 12       | 1.6                                      | 58                     | 4,635                                                   | 6,834                                              | 1.39           |
| 10  | 50/0.1/1         | <sup>t</sup> Bu-P <sub>4</sub> | -25        | 12       | 1.3                                      | 37                     | 2,996                                                   | 4,678                                              | 1.60           |
| 11  | 50/0.1/1         | <sup>t</sup> Bu-P <sub>4</sub> | -9         | 12       | 5.3                                      | 82                     | 6,509                                                   | 10,290                                             | 1.64           |
| 12  | 50/0.1/1         | <sup>t</sup> Bu-P <sub>4</sub> | 28         | 12       | 5.3                                      | 65                     | 5,182                                                   | 5,726                                              | 2.29           |
| 13  | 50/0.1/1         | <sup>t</sup> Bu-P <sub>4</sub> | 41         | 12       | 5.3                                      | 52                     | 4,167                                                   | 5,479                                              | 2.18           |
| 14  | 25/0.1/1         | <sup>t</sup> Bu-P <sub>4</sub> | -25        | 12       | 5.3                                      | 87                     | 3,504                                                   | 4,127                                              | 1.11           |
| 15  | 100/0.2/1        | <sup>t</sup> Bu-P <sub>4</sub> | -25        | 12       | 5.3                                      | 88                     | 13,846                                                  | 19,601                                             | 1.08           |

Conditions: **HL** = 0.104 g, (0.67 mmol) in THF; **HL** was added to a <sup>t</sup>Bu-P<sub>4</sub>/BnOH mixture.

<sup>a</sup>Monomer conversion were measured by <sup>1</sup>H NMR.

<sup>b</sup>M<sub>n, cal</sub> = ([HL]<sub>0</sub>/[BnOH]<sub>0</sub>) × Conv.% × M<sub>HL</sub> + M<sub>BnOH</sub>.

<sup>c</sup>M<sub>n</sub> and Đ were determined by GPC at 40 °C in THF relative to PMMA standards.

Figure S21). The free energy for the formation of  $\alpha$ -H abstracted acylated anion is 26.5 kcal mol<sup>-1</sup> less than that of the formation of  $\delta$ -H abstracted alkyl anion in THF. We also performed quantum-mechanical calculations to evaluate the Gibbs free energy for proton abstraction from BnOH, **HL**, and H<sub>2</sub>O by <sup>t</sup>Bu-P<sub>4</sub> (see supplemental information and Figure S22). The Gibbs free energy for the deprotonations follows the order of BnOH (3.9 kcal mol<sup>-1</sup>) < **HL** (5.7 kcal mol<sup>-1</sup>) < H<sub>2</sub>O (9.3 kcal mol<sup>-1</sup>). Such order suggests that BnO<sup>-</sup> is the most readily generated active initiating species, while deprotonation of **HL** is slightly disfavored.

The feasibility of BnO<sup>-</sup> being the active initiating species was further supported by the observation that alkali metal alkoxides, such as KOMe, NaOMe, KOEt, NaOEt, KO<sup>t</sup>Bu, and NaO<sup>t</sup>Bu, could also initiate the ROP of **HL** at -25 °C, giving solid poly**HL** with a MW of up to 475.7 kg mol<sup>-1</sup> and narrow dispersity Đ (see in Table S5). It is also worth mentioning that the ROPs initiated by alkali metal alkoxides were less rapid compared with <sup>t</sup>Bu-P<sub>4</sub> catalyst, which might be attributed to the observed poor solubility of the alkali metal alkoxides in the reactant mixture.

The presence of water impurity can presumably interfere with the above-mentioned process. **HL** with approximately 100 ppm water was prepared for the ROP with <sup>t</sup>Bu-P<sub>4</sub>/BnOH at a ratio of [HL]/[<sup>t</sup>Bu-P<sub>4</sub>]/[BnOH] = 100/1/1 at -25 °C for 12 h, [HL]<sub>0</sub> = 5.3 M in THF (Table S12, run 2). Intriguingly, the **HL** conversion dramatically dropped to 21%, and the poly**HL** produced had a lower MW of M<sub>n</sub> = 17,938 g mol<sup>-1</sup> with a greatly broadening dispersity of Đ = 2.258.

### Physical properties of poly**HL**

We next investigated the physical properties of poly**HL**. The thermostability of poly**HL** produced by <sup>t</sup>Bu-P<sub>4</sub> and <sup>t</sup>Bu-P<sub>4</sub>/BnOH systems were also analyzed

through thermal gravimetric analysis (TGA) and differential scanning calorimetry (DSC). Both the *linear*- and *cyclic*-poly**HL** exhibited high thermal stability ( $T_{d,5\%} > 325^\circ\text{C}$ ). The TGA and derivative thermogravimetry (DTG) curves of *cyclic*-product showed  $T_{d,5\%} = 332.3^\circ\text{C}$  and  $T_{\text{max}} = 367.3^\circ\text{C}$  (Figure S23), which were 6 °C and 12 °C higher than those of the linear polymer with a similar MW (Figure S24). These results are consistent with conclusions from another study that the thermal stability of cyclic polymers are generally higher than that of their linear analogs.<sup>9,10,24,25</sup> The DSC curves for the second heating scan curves (5 °C min<sup>-1</sup>) of two poly**HL** specimens displayed two similar glass-transition temperatures ( $T_g$ ) of -29.7 °C and -30.6 °C for *cyclic*- and *linear*-poly**HL**, respectively, and no crystalline peaks were observed (Figures S25 and S26). All the data confirmed that both the *cyclic*- and *linear*-poly**HL** are amorphous polymeric materials with excellent thermal stability.

Broadly speaking, poly**HL** is a new type of polyhydroxyalkanoate. Previous polyhydroxyalkanoates, such as poly( $\gamma$ -butyrolactone), poly( $\delta$ -valerolactone), poly( $\epsilon$ -valerolactone), and poly(lactic acid), have attracted widespread attention due to their degradability. However, their drawbacks, such as relatively high brittleness and low impact strength<sup>9,26,27</sup> limited their potential applications. In contrast, poly**HL** has relatively high flexibility, which provides new opportunities in applications, such as PSAs and polyester polyols used to produce polyurethanes.

The ability to obtain high MW solid polymers via the ROP of **HL** by <sup>t</sup>Bu-P<sub>4</sub> alone provides a promising avenue to obtain PSAs with potential utilities. A simple 180° peel test was carried out to measure the peel strength of poly**HL**. Cyclic samples were employed here because our current synthetic methodology can give much higher MW for *cyclic*-poly**HL** than a

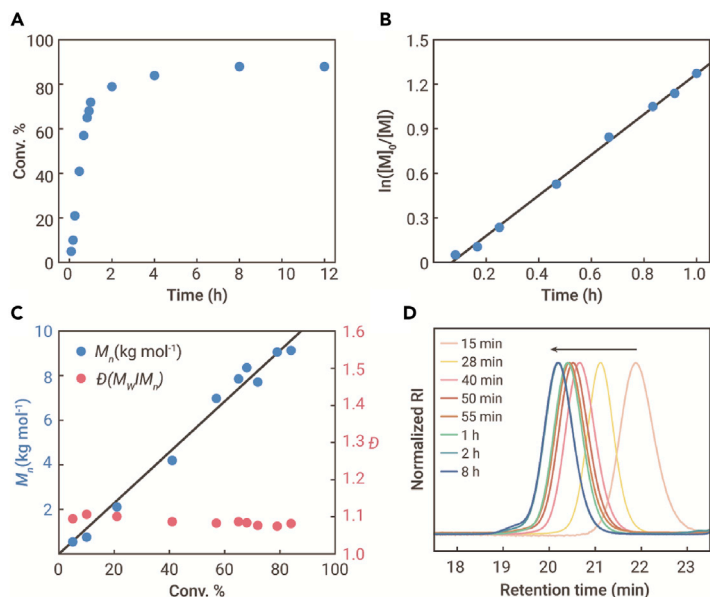

**Figure 2.** ROP of HL catalyzed by <sup>t</sup>Bu-P<sub>4</sub>/BnOH (A) Plot of HL conversion versus time. (B) First-order kinetic plots of  $\ln([M]_0/[M])$  versus time. (C) Plot of molecular weight ( $M_n$ ) and  $\bar{D}$  versus HL conversion. (D) GPC traces of polyHL obtained at different polymerization time.  $[\text{HL}]/[\text{tBu-P}_4]/[\text{BnOH}] = 50/0.1/1$ ,  $[\text{HL}]_0 = 5.3$  M in THF,  $T = -25^\circ\text{C}$ .

linear one. Glass slides were utilized as the rigid substrate, and a sheet of A4 paper (15 × 2.6 cm) was used as the face substrate (Figure 4A). The polyHL samples were evenly coated on the glass slides by using a coating blade. Cross-sectional scanning electron microscope (SEM) showed that the thin film had a fair uniform thickness of  $36.9 \pm 1.2$  μm (Figure 4B). The test was performed at 25°C on an Instron 5966 universal testing instrument at 180° peel angle at a rate of 10 mm min<sup>-1</sup>. To our delight, polyHL<sub>319</sub>, polyHL<sub>562</sub>, and polyHL<sub>160</sub> (the numbers refer to the sample with an  $M_n$  of 319, 562, and 160 kg mol<sup>-1</sup>, respectively) exhibited adhesion with peel strength of  $3.8 \pm 0.12$ ,  $3.5 \pm 0.20$ , and  $1.5 \pm 0.65$  N cm<sup>-1</sup>, respectively (Figure 4C; Table S6). The peel strength of polyHL<sub>319</sub> and polyHL<sub>562</sub> were relatively higher than those of commercialized 3M Scotch tapes tested under the same test conditions (3M 665,  $2.4 \pm 0.40$  N cm<sup>-1</sup>; 3M 810,  $1.9 \pm 0.31$  N cm<sup>-1</sup>) and vinyl electrical tape (3M 1,600,  $0.8 \pm 0.17$  N cm<sup>-1</sup>). PolyHL<sub>160</sub> exhibited a peel strength of  $1.5 \pm 0.65$  N cm<sup>-1</sup>, comparable with that of the 3M 810 Scotch tape. In addition, a high MW polymer sample ( $M_n = 613.8$  kg mol<sup>-1</sup>,  $\bar{D} = 1.45$ ; Table S3, run 3) was solvent-cast into a PTFE mold to form a transparent and colorless polymer film with good flexibility and viscoelasticity (Figure 4D).

#### Development of methodology for chemical recycling of polyHL to HL

Van 't Hoff analysis was performed to calculate the thermodynamic parameters of the polymerization (Figures S27 and S28; Tables S7–S9). According to Dainton's equation,<sup>28</sup> the change in enthalpy ( $\Delta H_p^\ddagger$ ) and entropy ( $\Delta S_p^\ddagger$ ) were calculated to be  $-13.12$  kJ mol<sup>-1</sup> and  $-49.09$  J mol<sup>-1</sup> K<sup>-1</sup>, respectively, which further gave a  $T_c$  of  $-6^\circ\text{C}$  in THF at  $[\text{HL}]_0 = 1.0$  mol L<sup>-1</sup>.

To test the chemical recyclability, cyclic-polyHL with  $M_n$  in the range of 300–400 kg mol<sup>-1</sup> were employed. Initially, several trifluoromesylate metal salts, including AgCF<sub>3</sub>SO<sub>3</sub>, Cu(CF<sub>3</sub>SO<sub>3</sub>)<sub>2</sub>, Fe(CF<sub>3</sub>SO<sub>3</sub>)<sub>3</sub>, Sc(CF<sub>3</sub>SO<sub>3</sub>)<sub>3</sub>, and Y(CF<sub>3</sub>SO<sub>3</sub>)<sub>3</sub> were employed to catalyze the depolymerization of polyHL in a sealed tube in toluene ( $[\text{HL}]_0 = 0.5$  M) at 120°C for 24 h (Table S10, runs 1–5). However, only Fe(CF<sub>3</sub>SO<sub>3</sub>)<sub>3</sub> and Sc(CF<sub>3</sub>SO<sub>3</sub>)<sub>3</sub> gave 53% and 27% recovery of HL monomer, respectively (Table S10, runs 3 and 4). FeCl<sub>2</sub>, Fe(acac)<sub>2</sub>, Sn(Oct)<sub>2</sub>, DBTDL, and <sup>t</sup>Bu-P<sub>4</sub> exhibited no obvious reactivity even at a higher temperature of 150°C in mesitylene for 12 h (Table S10, runs 6–10). We next examined ZnCl<sub>2</sub> in toluene at 130°C, 140°C, and 150°C for 12 h, respectively, and found that the monomer conversion increased with an elevated temperature (Table S10, runs 11–13, 31%, 39%, and 54%, respectively). Particularly, when employing more polar 1,2-dichlorobenzene (*o*-DCB) at 150°C and 160°C, the monomer recovery significantly increased to 91% and 100%, respectively (Table S10, runs 14 and 15), thus achieving a complete chemical recycling procedure by zinc chloride catalyst.

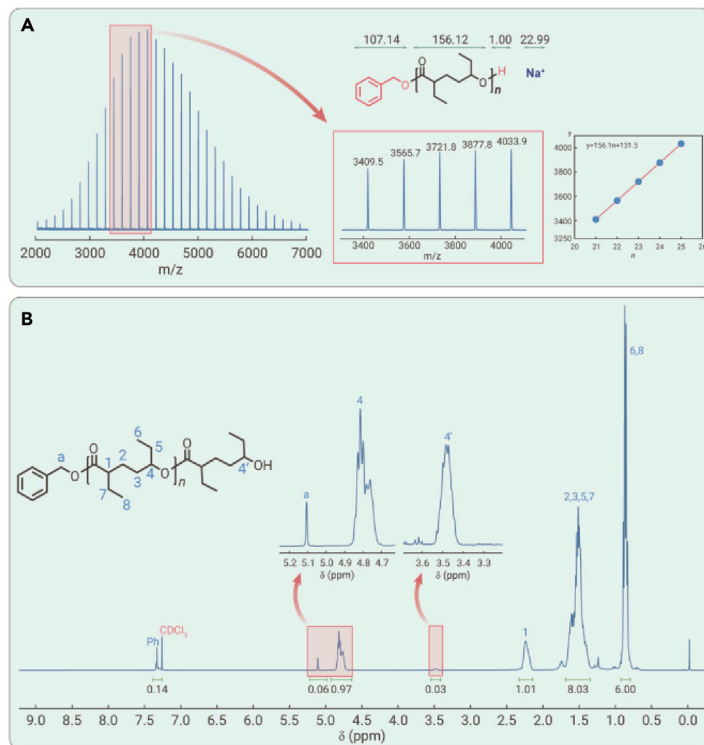

**Figure 3.** Structural analyses of polyHL obtained by <sup>t</sup>Bu-P<sub>4</sub> and BnOH at a ratio of 0.1/1 (A) MALDI-TOF mass spectrum of the resulting polyHL shows only one group of molecular ion peaks, and the enlarged MALDI-TOF mass spectrum confirms that the molecular ion peaks correspond to the BnOH end-capped product. (B) <sup>1</sup>H NMR spectrum of linear-polyHL end-capped with BnOH.

To further cut down the energy input during the chemical recycling process, La ( $[\text{La}(\text{SiMe}_3)_3]$ ) were also tested. At 50°C with  $[\text{HL}]_0 = 0.5$  M in toluene, excellent HL recovery was detected: 47% in 3 h, 81% in 12 h, and 88% in 24 h (Table S11, runs 1–3), and no significant improvement of recovery rate was observed even in a system diluted to 0.1 M (Table S11, runs 4 and 5). To achieve a complete recovery of HL monomer, the temperature was elevated to 80°C for the reaction with  $[\text{HL}]_0 = 0.5$  M in toluene, the recovery of HL monomer reached 85% within 3 h and

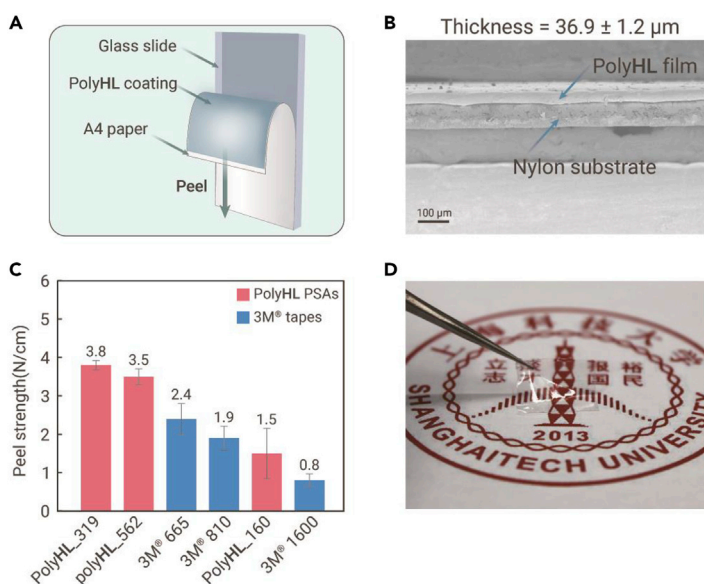

**Figure 4.** The pressure-sensitive adhesive properties of high MW cyclic-polyHL and images of a polyHL thin film (A) Diagram of the 180° peel test. (B) Cross-sectional SEM image of the polyHL thin film to determine the average thickness. (C) Results of the 180° peel test: the peel strength of polyHL samples with varied MW (red) and three commercialized tapes (blue) are shown. (D) Images of the polyHL thin film to show that the film is colorless with excellent light permeability.

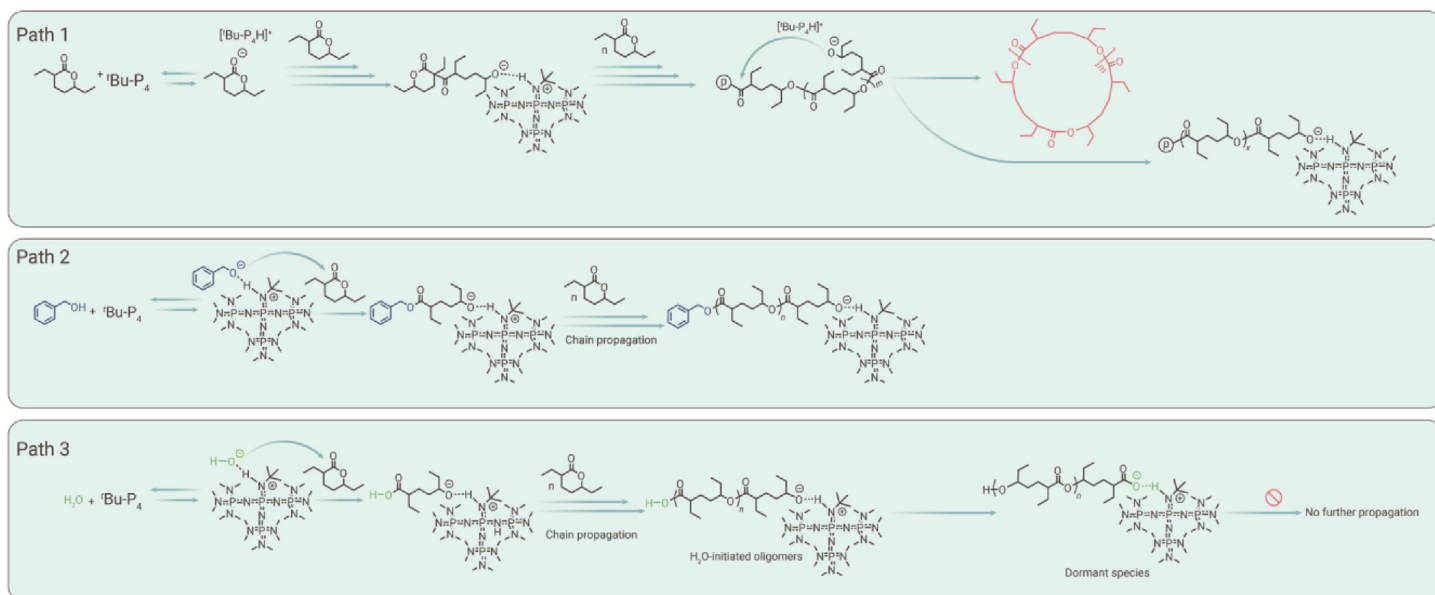

Figure 5. A proposed multiple competitive initiating mechanism for the ROP of HL to polyHL

remained constant over 12 h (Table S11, runs 6 and 7), indicating a much more rapid depolymerization process. When the system was diluted to 0.1 M at 80°C, 93% recovery of **HL** monomer was achieved in 3 h (Table S11, run 8), and 100% recovery was achieved in 12 h (Figure S29; Table S11, run 9). Finally, the validity of our catalytic method to chemically recycle *linear*-poly**HL** was confirmed with ZnCl<sub>2</sub>, giving 100% recovery of **HL** in *o*-DCB at 160°C in 12 h (Figure S30).

## DISCUSSION

Our mechanistic studies may rationalize why **HL** was observed to be non-polymerizable previously.<sup>16</sup> Firstly, for the initiation step, our data support a multiple competitive initiating mechanism (Figure 5), including (path 1) direct abstraction of the proton from the C-H bond vicinal to the carbonyl group of **HL** (the most acidic proton in the lactone, Figure S21) to generate highly reactive species, (path 2) hydroxyl deprotonation of alcohols to form alkoxides, and (path 3) deprotonation of residual water to form hydroxide. Compared with lactones without a substituent at the carbon vicinal to the carbonyl group, the ethyl substituent at the same carbon lowers the acidity of the C-H bond and also sterically hinders the approach of bulky bases, especially <sup>t</sup>Bu-P<sub>4</sub>, thus disfavoring the polymerization process through path 1. Secondly, for the subsequent nucleophilic ring-opening step, both ethyl substituents are vicinal to the ester group, which should sterically hinder the approach to the ester by any nucleophiles, thus increasing corresponding activation barriers no matter which initiating mechanism leads to the ring-opening nucleophile. The experimentally measured thermodynamic data for ROP of **HL** also clearly indicated that the two ethyl substituents of **HL** greatly increase the entropic penalty compared with non-/mono-substituted  $\delta$ -lactones,<sup>28,29</sup> thus resulting in significantly less thermodynamically favorable polymerization than the less-substituted counterparts (Table S9). Therefore, the ROPs of **HL** are both thermodynamically and kinetically challenging, requiring judiciously selected reaction conditions to allow for polymerization, including sub-zero temperatures, prolonged reaction times, and highly concentrated conditions (*vide supra*).

Our work subsequently showed that the polymerization of **HL** is highly sensitive to water impurity in the reaction system. In essence, the H<sub>2</sub>O-initiated oligomers contain a carboxylic acid end group, which should have a strong tendency to quench the active alkoxide species for the chain propagation process and form dormant species featured by a terminal carboxylate anion (Figure 5, path 3). Potassium benzoate and cesium formate were tested as potential ROP initiators under our optimized conditions (Table S12, run 3 and 4, *T* = -25°C, *t* = 24 h, [HL]<sub>0</sub> = 5.0 M in THF). At elevated temperature *T* = 30°C, potassium acetate (KOAc) was also employed at a ratio of [HL]/[KOAc]/[Bu<sup>t</sup>OH] = 50/1/1 and 50/1/0 (Table S12, runs 5 and 6). However, no **HL** conversion was detected for all three species. These observations confirm that carboxylate is a dormant species.

As such, rigorous drying is the key to the present success of ROP of **HL**, or the formation of carboxylate would inhibit the reaction.

## CONCLUSION

In conclusion, we have developed the first methodology to polymerize six-membered lactone with two substituents vicinal to the ester group, which enables the first synthesis of chemically recyclable solid polyesters with a high CO<sub>2</sub> content, high MW, and promising adhesive properties comparable with commercial counterparts by only using CO<sub>2</sub> and bulk chemicals as the starting materials. This work provides a brand-new avenue to potential large-scale utilization of CO<sub>2</sub> as a main chemical feedstock, while the chemical recyclability may allow for fixation of CO<sub>2</sub> in solid polymeric materials over a long period of time.

## REFERENCES

- Geyer, R., Jambeck, J.R., and Law, K.L. (2017). Production, use, and fate of all plastics ever made. *Sci. Adv.* **3**, e1700782.
- Meys, R., Kätelhön, A., Bachmann, M., et al. (2021). Achieving net-zero greenhouse gas emission plastics by a circular carbon economy. *Science* **374**, 71–76.
- Muthuraj, R., and Mekkonen, T. (2018). Recent progress in carbon dioxide (CO<sub>2</sub>) as feedstock for sustainable materials development: co-polymers and polymer blends. *Polymer* **145**, 348–373.
- Michael, C. (2021). Carbon dioxide (CO<sub>2</sub>) as chemical feedstock for polymers – already nearly 1 million tonnes production capacity installed! Nova Institute. <http://nova-institute.eu/press/?id=236>.
- Brooks, A.A., Snyder, R.L., and Coates, G.W. (2021). Chemically recyclable thermoplastics from reversible-deactivation polymerization of cyclic acetals. *Science* **373**, 783–789.
- Shi, C., McGraw, M.L., Li, Z.-C., et al. (2020). High-performance pan-tactic polythioesters with intrinsic crystallinity and chemical recyclability. *Sci. Adv.* **6**, eabc0495.
- Yuan, J., Xiong, W., Zhou, X., et al. (2019). 4-Hydroxyproline-derived sustainable polythioesters: controlled ring-opening polymerization, complete recyclability, and facile functionalization. *J. Am. Chem. Soc.* **141**, 4928–4935.
- Shi, C., Li, Z.-C., Caporaso, L., et al. (2021). Hybrid monomer design for unifying conflicting polymerizability, recyclability, and performance properties. *Chem* **7**, 670–685.
- Zhu, J.B., Watson, E.M., Tang, J., et al. (2018). A synthetic polymer system with repeatable chemical recyclability. *Science* **360**, 398–403.
- Hong, M., and Chen, E.Y.X. (2016). Completely recyclable biopolymers with linear and cyclic topologies via ring-opening polymerization of gamma-butyrolactone. *Nat. Chem.* **8**, 42–49.
- Sasaki, Y., Inoue, Y., and Hashimoto, H. (1976). Reaction of carbon dioxide with butadiene catalysed by palladium complexes. Synthesis of 2-ethylidenehept-5-en-4-olide. *J. Chem. Soc. Chem. Commun.* **15**, 605–606.
- Haack, V., Dinjus, E., and Pitter, S. (1998). Synthesis of polymers with an intact lactone ring structure in the main chain. *Die Angew. Makromol. Chem.* **257**, 19–22.
- Price, C.J., Reich, B.J.E., and Miller, S.A. (2006). Thermodynamic and kinetic considerations in the copolymerization of ethylene and carbon dioxide. *Macromolecules* **39**, 2751–2756.
- Nakano, R., Ito, S., and Nozaki, K. (2014). Copolymerization of carbon dioxide and butadiene via a lactone intermediate. *Nat. Chem.* **6**, 325–331.

- Liu, M., Sun, Y., Liang, Y., et al. (2017). Highly efficient synthesis of functionalizable polymers from a CO<sub>2</sub>/1,3-butadiene-derived lactone. *ACS Macro Lett.* **6**, 1373–1378.
- Duparc, V.H., Shakaroun, R.M., Slawinsky, M., et al. (2020). Ring-opening (co)polymerization of six-membered substituted  $\delta$ -valerolactones with alkali metal alkoxides. *Eur. Polym. J.* **134**, 109858.
- Tang, S., Zhao, Y., and Nozaki, K. (2021). Accessing divergent main-chain-functionalized polyethylenes via copolymerization of ethylene with a CO<sub>2</sub>/butadiene-derived lactone. *J. Am. Chem. Soc.* **143**, 17953–17957.
- Chen, L., Li, Y., Yue, S., et al. (2017). Chemoselective RAFT polymerization of a trivinyl monomer derived from carbon dioxide and 1,3-butadiene: from linear to hyperbranched. *Macromolecules* **50**, 9598–9606.
- Sharif, M., Jackstell, R., Dastgir, S., et al. (2017). Efficient and selective palladium-catalyzed telomerization of 1,3-butadiene with carbon dioxide. *ChemCatChem* **9**, 542–546.
- Behr, A., and Brehme, V.A. (2002). Homogeneous and heterogeneous catalyzed three-step synthesis of 2-ethylheptanoic acid from carbon dioxide, butadiene and hydrogen. *J. Mol. Cat. A Chem.* **187**, 69–80.
- Liu, S., Ren, C., Zhao, N., et al. (2018). Phosphazene bases as organocatalysts for ring-opening polymerization of cyclic esters. *Macromol. Rapid Comm.* **39**, 1800485.
- Zhao, N., Ren, C., Li, H., et al. (2017). Selective ring-opening polymerization of non-strained  $\gamma$ -butyrolactone catalyzed by a cyclic trimeric phosphazene base. *Angew. Chem. Int. Ed. Engl.* **56**, 12987–12990.
- Roovers, J. (2002). Organic cyclic polymers. In *Cyclic Polymers*, J.A. Semlyen, ed. (Springer), pp. 347–384.
- Kaitz, J.A., Diesendruck, C.E., and Moore, J.S. (2013). End group characterization of poly(phthalaldehyde): surprising discovery of a reversible, cationic macrocyclization mechanism. *J. Am. Chem. Soc.* **135**, 12755–12761.
- Hong, M., and Chen, E.Y.X. (2016). Towards truly sustainable polymers: a metal-free recyclable polyester from biorenewable non-strained  $\gamma$ -butyrolactone. *Angew. Chem. Int. Ed. Engl.* **55**, 4188–4193.
- Aubin, M., and Prud'homme, R.E. (1981). Preparation and properties of poly(valerolactone). *Polymer* **22**, 1223–1226.
- Domenek, S., Fernandes-Nassar, S., and Ducruet, V. (2018). Rheology, mechanical properties, and barrier properties of poly(lactic acid). In *Synthesis, Structure and Properties of Poly(lactic Acid)*, M.L. Di Lorenzo and R. Androsch, eds. (Springer International Publishing), pp. 303–341.
- Schneiderman, D.K., and Hillmyer, M.A. (2016). Aliphatic polyester block polymer design. *Macromolecules* **49**, 2419–2428.
- Olsen, P., Odellius, K., and Albertsson, A.C. (2016). Thermodynamic presynthetic considerations for ring-opening polymerization. *Biomacromolecules* **17**, 699–709.

#### ACKNOWLEDGMENTS

This work was supported by the National Natural Science Foundation of China (no. U2032132). We thank the Analytical Instrumentation Center (AIC) of the School of Physical Science and Technology, ShanghaiTech University, for their technical support. We thank Conger Li of ShanghaiTech University for the SEM test of polyHL samples. We thank Dr. Hua Liu of AIC, ShanghaiTech University, for technical support in *in situ* NMR tests, and Dr. Wenbin Yao of Dow Chemical Company for helpful discussions about polyols.

#### AUTHOR CONTRIBUTIONS

B.L. conceived the project and analyzed the data. Y.L. performed experiments, analyzed the data, and drafted the manuscript. L.X. conducted the DFT calculations and wrote sections of the manuscript. N.G. and Y.-S. performed part of the syntheses of the monomer and samples. All authors discussed the experimental and theoretical results and commented on the manuscript.

#### DECLARATION OF INTERESTS

The authors declare no competing interests.

#### SUPPLEMENTAL INFORMATION

Supplemental information can be found online at <https://doi.org/10.1016/j.xinn.2022.100216>.

#### LEAD CONTACT WEBSITE

[https://spst.shanghaitech.edu.cn/spst\\_en/2018/0301/c2939a51331/page.htm](https://spst.shanghaitech.edu.cn/spst_en/2018/0301/c2939a51331/page.htm).

**The Innovation, Volume 3**

**Supplemental Information**

**Chemically recyclable polyesters**

**from CO<sub>2</sub>, H<sub>2</sub>, and 1,3-butadiene**

**Yongjia Lou, Luyan Xu, Ninglin Gan, Yunyan Sun, and Bo-Lin Lin**



---

## Materials and reagents

All reactions and manipulations of air- and moisture-sensitive materials were carried out in oven-dried glassware on a dual-manifold Schlenk line, or in a nitrogen-filled glovebox. Tetrahydrofuran (THF) was degassed and dried over CaH<sub>2</sub> for one day, followed by vacuum distillation, then dried over activated 4 Å molecular sieves for three times. Toluene was degassed and dried over Na for two days with benzophenone indicator, then vacuum distilled, followed by drying over activated 4 Å molecular sieves for three times. Other organic solvents employed were degassed and dried before use.

3,6-diethyltetrahydro-2H-pyran-2-one (**HL**) was dried over CaH<sub>2</sub> overnight, vacuum distilled and dried over activated 4 Å molecular sieves for three times for further use. Palladium on activated charcoal (Pd/C), Tris(dibenzylideneacetone)dipalladium [Pd<sub>2</sub>(dba)<sub>3</sub>] and tris(2-methoxyphenyl)phosphine (TOMPP) were purchased from Aladdin Reagent Co., Ltd., J&K Scientific Ltd., J&K Scientific Ltd. respectively, and used as received. 1-*tert*-Butyl-4,4,4-tris(dimethylamino)-2,2-bis[tris(dimethylamino)phosphoranylide-*namino*]-2λ<sup>5</sup>,4λ<sup>5</sup>-catenadi(phosphazene) (*t*Bu-P<sub>4</sub>, 0.8 M in hexane), *tert*-Butylimino-tris(dimethylamino)phosphorane (*t*Bu-P<sub>1</sub>) and 1-*tert*-butyl-2,2,4,4,4-pentakis-(dimethylamino)-2λ<sup>5</sup>,4λ<sup>5</sup>-catenadi(phosphazene) (*t*Bu-P<sub>2</sub>, 2.0 M in THF) were purchased from Sigma Aldrich Co. Ltd., and the solvent were removed under vacuum prior to use. tri[*N,N*-bis(trimethylsilyl)amide] lanthanum(III) La[N(SiMe<sub>3</sub>)<sub>2</sub>]<sub>3</sub> (**La**) was purchased from Aldrich Chemical Co. and used as received. 1,8-diazabicyclo[5.4.0]undec-7-ene (DBU), stannous octoate [Sn(Oct)<sub>2</sub>], dibutyltin dilaurate (DBTDL) were purchased from TCI Co., Ltd., Aladdin Reagent Co., Ltd., Aladdin Reagent Co., Ltd., respectively, which were dried over activated 4 Å molecular sieves for further use. Diphenyl phosphate (DPP) was purchased from J&K Scientific Ltd., and used as received. 1,5,7-Triazabicyclo[4.4.0]dec-5-ene (TBD) was purchased from TCI Co., Ltd., and used as received. Sodium methoxide (NaOMe), sodium ethoxide (NaOEt), sodium *tert*-butoxide (NaO*t*Bu) were purchased from TCI Co., Ltd.; potassium *tert*-butoxide (KO*t*Bu), lithium *tert*-butoxide (LiO*t*Bu) were purchased from J&K Scientific Ltd.; potassium methoxide (KOMe), potassium ethoxide(KOEt) and lithium methoxide (LiOMe) were purchased from Aladdin Reagent Co., Ltd., Shanghai Macklin Biochemical Technology Co. Ltd. and Adamas Reagent, Ltd., respectively, and all the alkali metal alkoxides were stored in a nitrogen-filled glovebox without further purification process.

## General polymerization procedures

Polymerizations were performed in 10 mL oven-dried Schlenk tubes linked to a dual-manifold Schlenk line utilizing an external cooling bath. The Schlenk tube was charged with a predetermined amount of catalyst (and/or initiator) and solvent in a glovebox. The Schlenk tube was sealed with a septum, taken out of the glovebox, and the reaction started when immersing into the cooling bath. After equilibration at the desired polymerization temperature, the polymerization reaction was initiated by rapid addition of predetermined monomer solution via a gastight syringe. After a desired period of reaction time, the polymerization was quenched by addition of an excess methanol acidified with HCl (5%), a 0.05 mL of aliquot was taken from the reaction mixture and prepared for <sup>1</sup>H NMR analysis to obtain the monomer conversion data. The quenched mixture was then precipitated into 50 mL of cold methanol, and washed with methanol for several times to remove unreacted monomer and irrespective components, then dried in a vacuum oven at 80°C to a constant weight.

## Thermodynamic studies

In a glovebox filled with nitrogen, an oven-dried 25 mL Schlenk tube was charged with **HL** monomer (50 equiv. to BnOH, 104.1 mg, 0.667 mmol). The Schlenk tube was sealed with rubber plug, taken out of the glovebox and immersed in the predetermined cooling/oil bath. After equilibration at the desired polymerization temperature, the polymerization was initiated by rapid addition of BnOH/*t*Bu-P<sub>4</sub> in THF at a ratio of 0.1/1 via a gastight syringe. After a desired period of polymerization time, the

---

mixture was quenched for  $^1\text{H}$  NMR analysis. such parallel polymerization reactions at different temperatures gave respective  $[\text{HL}]_{\text{eq}}$ .

## Kinetic studies

For kinetic studies, the dependence of monomer conversion at  $-25^\circ\text{C}$  on polymerization time was determined by  $^1\text{H}$  NMR. Several parallel polymerization reactions were conducted to avoid conversion systematic error induced by aliquot extraction. The ROP reactions with different  $[\text{HL}]/[\text{tBu-P}_4]/[\text{BnOH}]$  ratios of 50/0.1/1 and 50/1/0 were carried out.  $[\text{HL}]/[\text{tBu-P}_4]/[\text{BnOH}] = 50/0.1/1$ :  $\text{HL} = 104$  mg,  $[\text{HL}]_0 = 5.3$  M in THF;  $[\text{HL}]/[\text{tBu-P}_4]/[\text{BnOH}] = 50/1/0$ :  $\text{HL} = 104$  mg,  $[\text{HL}]_0 = 4.0$  M in THF (See in Table S2 and S3).

## Measurements of molecular weight and intrinsic viscosity

Polymer number-average molecular weights ( $M_n$ ) and molecular weight distributions ( $D = M_w/M_n$ ) were measured by gel permeation chromatography (GPC) analyses carried out at  $40^\circ\text{C}$  and a flow rate of 1.0 mL/min with THF as the eluent on a Malvern GPC TDA305 instrument with D6000M general mixed org columns. The instrument was calibrated with seven PMMA standards, and the calculation of chromatograms were processed with Malvern OmniSEC software (administrator, version 12.1).

Analysis of the selected *linear*- and *cyclic*-polyHL for the Mark-Houwink plot was performed on a Malvern Viscotek TDMax Multiple Detector (light scattering, refractive index, viscometer and ultra violet) GPC instrument. The test was carried out at  $40^\circ\text{C}$  and the flow rate was set 1.0 mL min $^{-1}$ , the eluent was THF, and related calculations and chromatograms was processed with Malvern OmniSEC software (administrator, version 12.1).

## Spectroscopic characterizations

The isolated low molecular weight sample was analyzed by matrix-assisted laser desorption/ionization time-of-flight mass spectroscopy (MALDI-TOF MS). The experiment was performed on a Bruker Autoflex Speed MALDI-TOF mass spectrometer (Bruker Daltonics) operated in positive ion, reflector mode. A thin layer of a 1% NaI solution was first deposited on the target plate, followed by an aliquot of 1.0  $\mu\text{L}$  mixed sample and matrix solution (2,5-dihydroxybenzoic acid, DHB, 20 mg/mL in 50% THF, 0.1% TFA) before air dry. External calibration was done using a peptide calibration mixture on a spot next to the sample spot. The raw data was processed in the flexAnalysis software (version 3.4, Bruker Daltonics) and the figure was depicted in Origin Pro 2019b software.

NMR spectra were recorded on a Bruker ADVANCE III HD500 500 MHz (FT 500 MHz, H; 125 MHz,  $^{13}\text{C}$ ) or a Bruker ADVANCE III HD500 400MHz (FT 400 MHz, H; 100 MHz,  $^{13}\text{C}$ ) spectrometer. Chemical shifts for all spectra were referenced to internal solvent resonances and were reported as parts per million (ppm) relative to  $\text{SiMe}_4$ .

## Thermal analysis

The probing of Melting transition temperature ( $T_m$ ) and glass transition temperature ( $T_g$ ) were carried out by differential scanning calorimetry (DSC) on a DSC 8500 instrument, Perk Elmer.  $T_g$  values were obtained from a second scan after the thermal history was removed from the first scan. The second heating rate and the first cooling rate were  $5^\circ\text{C}/\text{min}$ . Decomposition onset temperatures ( $T_{d,5\%}$ ) and maximum rate decomposition temperatures ( $T_{\text{max}}$ ) of the polymers were measured by thermal gravimetric analysis (TGA) on a TGA 8000 instrument, Perk Elmer. Polymer samples were heated from  $30^\circ\text{C}$  to  $600^\circ\text{C}$  at a rate of  $10^\circ\text{C}/\text{min}$ .

## 180° peel test

180° peel test was performed using an Instron 5966 universal testing instrument at a peeling rate of 10 mm/min. The high MW poly $\mathbf{HL}$  sample was evenly coated on a smooth glass slide (2.5 cm width) and adhered to a slip of A4 paper (15 cm  $\times$  2.5 cm) with a constant pressure provided by the same person. After incubation for 24h under constant temperature and humidity, the average peel force was collected and reported from three parallel samples. The poly $\mathbf{HL}$  samples with different MW employed in the test were synthesized by  $t\text{-Bu-P}_4$  alone at a ratio of  $[\mathbf{HL}]/[t\text{-Bu-P}_4] = 100/1$  at  $-25^\circ\text{C}$  in varied reaction time ( $[\mathbf{HL}]_0 = 5.3 \text{ M}$ ).

The commercial 3M<sup>®</sup> 665, 810 and 1600 tapes employed in the control group were also adhered to the glass slides of the identical specification with a constant pressure provided by the same person. The average peel force was also collected and reported from three parallel samples made after incubation under the identical conditions.

## General chemical recycling procedures

A sealed tube containing 500 mg of the purified poly $\mathbf{HL}$  under a nitrogen atmosphere dissolved in predetermined solvents was subsequently sealed, taken out of the glovebox, and immersed in an oil bath. Then an aliquot of predetermined amount of catalyst solution was added into the tube via a gastight syringe. After a required period of time, the reaction mixture was rapidly cooled to room temperature and then the solvent was completely removed in vacuo. A colorless oil was formed and the  $\mathbf{HL}$  monomer recovery data was subsequently determined by crude  $^1\text{H}$  NMR probing. Finally, the chemically recycled  $\mathbf{HL}$  monomer was further purified by column chromatography.

## Procedure for the synthesis of 3-ethylidene-6-vinyltetrahydro-2H-pyran-2-one ( $\delta\text{-L}$ ) from $\text{CO}_2$ and 1,3-butadiene

$\delta\text{-L}$  was synthesized according to the literature<sup>1</sup>. To a 100 ml stainless steel autoclave with a magnetic stirring bar,  $\text{Pd}_2(\text{dba})_3$  (156.7mg, 0.03 mol%), tris(2-methoxyphenyl)phosphine (TOMPP) (361.5 mg, 0.18 mol%) and 20 ml anhydrous acetonitrile were added into the vessel to form a clear solution. 1,3-butadiene (49 ml, 0.57 mol) was cooled into a pressure flask in advance, followed by added dropwise into the clear solution. The reaction mixture was subsequently stirred at  $-25^\circ\text{C}$  under  $\text{N}_2$  atmosphere, then 50 bar of  $\text{CO}_2$  (99.99% purity) was inflated into the autoclave and heated at  $80^\circ\text{C}$  for 20 h. The obtained mixture was purified through column chromatography on silica gel with hexane/EtOAc ( $v/v = 5/1$ ). Yellow oil was obtained after column chromatography, subsequently the product was further purified by vacuum distillation.  $^1\text{H}$  NMR (500 MHz, Chloroform- $d$ )  $\delta$  7.13 (qt,  $J = 7.1, 2.3 \text{ Hz}$ , 1H), 5.88 (ddd,  $J = 16.8, 10.6, 5.4 \text{ Hz}$ , 1H), 5.34 (dt,  $J = 17.2 \text{ Hz}$ , 1H), 5.23 (d,  $J = 10.6 \text{ Hz}$ , 1H), 4.77 (m, 1H), 2.59 (m, 1H), 2.43 (s, 1H), 2.05 (m, 1H), 1.82 – 1.70 (m, 4H).  $^{13}\text{C}$  NMR (125 MHz, Chloroform- $d$ )  $\delta$  166.28, 141.19, 135.78, 125.88, 116.85, 78.91, 27.55, 21.91, 14.10

## Procedure for the synthesis of 3,6-diethyltetrahydro-2H-pyran-2-one ( $\mathbf{HL}$ ).

$\delta\text{-L}$  (3.11 g, 20.4 mmol), THF (25 ml) and Pd/C (28.8 mg, 5 wt% of Pd) were added into a 100 ml stainless steel autoclave with a magnetic stirring bar, under  $\text{N}_2$  atmosphere. 30 bar of  $\text{H}_2$  was inflated into the autoclave and the suspension was stirred at  $60^\circ\text{C}$  for 2 h. After removal of the solvent, the obtained mixture was purified by chromatography and vacuum distillation. The obtained  $\mathbf{HL}$  was a colorless liquid (isolated yield  $\sim 80\%$ ).  $^1\text{H}$  NMR (500 MHz, Chloroform- $d$ )  $\delta$  4.20 – 4.07 (m, 1H), 2.39 – 2.20 (m, 1H), 2.09 – 1.75 (m, 3H), 1.60 – 1.33 (m, 5H), 0.98 – 0.86 (m, 6H).  $^{13}\text{C}$  NMR (125 MHz, Chloroform- $d$ , data in parentheses refer to the diastereomer signal with relatively low chemical shift)  $\delta$  175.70 (173.82), 85.52 (79.24), 42.06 (39.63), 29.10 (28.24), 28.27 (26.21), 24.84 (23.81), 24.81 (22.84), 11.54 (11.00), 9.53 (9.19).

## Computational Methods

The quantum-mechanical calculations (Gaussian 09, Revision E.01) were performed at the level of b3lyp/AUG-cc-pVTZ to gain the stability property of four deprotonated-HL structures. Solvent effects (tetrahydrofuran (THF)) were further calculated by SMD method. The results were summarized in Table S12. The reactions in Figure S20 were calculated with 6-31+g\* basis set followed by solvation corrections in THF at the level of b3lyp/6-311+g\*\*.

**Table S1.** Results of ROP of **HL** catalyzed by varied common ROP catalytic systems.

| Run | HL/Cat.<br>/BnOH | Cat.                 | [M] <sub>0</sub><br>(mol/L) | Temp.<br>(°C) | Time<br>(h) | Solvent | Conv. <sup>b</sup><br>(%) | M <sub>n</sub> <sup>c</sup><br>(g mol <sup>-1</sup> ) | Đ <sup>c</sup> |
|-----|------------------|----------------------|-----------------------------|---------------|-------------|---------|---------------------------|-------------------------------------------------------|----------------|
| 1   | 40/1/1           | Sn(oct) <sub>2</sub> | neat                        | 60            | 48          | -       | -                         | -                                                     | -              |
| 2   | 80/1/2           | Sn(oct) <sub>2</sub> | neat                        | 100           | 24          | -       | -                         | -                                                     | -              |
| 3   | 40/1/1           | DBTDL                | 5.0                         | -25           | 48          | TOL     | -                         | -                                                     | -              |
| 4   | 80/1/2           | DBTDL                | neat                        | 100           | 24          | -       | -                         | -                                                     | -              |
| 5   | 30/1/1           | DPP                  | neat                        | -25           | 24          | -       | 4                         | -                                                     | -              |
| 6   | 30/1/1           | DPP                  | neat                        | 25            | 24          | -       | 7                         | -                                                     | -              |
| 7   | 30/1/1           | DPP                  | neat                        | 80            | 24          | -       | 11                        | -                                                     | -              |
| 8   | 40/1/1           | DBU                  | neat                        | 30            | 96          | -       | 3                         | -                                                     | -              |
| 9   | 40/1/1           | TBD                  | neat                        | 30            | 96          | -       | 54                        | 6010                                                  | 1.14           |
| 10  | 40/1/1           | TBD                  | 5.0                         | 30            | 96          | THF     | 37                        | 5596                                                  | 1.18           |
| 11  | 40/1/1           | TBD                  | 4.0                         | 30            | 96          | THF     | 19                        | -                                                     | -              |
| 12  | 40/1/1           | TBD                  | 3.0                         | 30            | 96          | THF     | 9                         | -                                                     | -              |
| 13  | 40/1/1           | TBD                  | 2.0                         | 30            | 96          | THF     | 4                         | -                                                     | -              |

<sup>a</sup>Conditions: **HL** = 0.10 g (0.67 mmol), the catalyst amount varied according to **[HL]/[Cat.]** ratios; <sup>b</sup>Conversion determined by <sup>1</sup>H NMR spectroscopy. <sup>c</sup>M<sub>n</sub> and Đ determined by GPC at 40°C in THF relative to PMMA standards.

**Table S2.** Kinetic studies of ROP results of **HL** catalyzed by <sup>t</sup>Bu-P<sub>4</sub>/BnOH system<sup>a</sup>.

| Time (h) | Conv. (%) | M <sub>n</sub> (g mol <sup>-1</sup> ) | Đ    | [M] <sub>t</sub> (mol/L) | ln([M] <sub>0</sub> /[M] <sub>t</sub> ) | [M] <sub>0</sub> /[M] <sub>t</sub> |
|----------|-----------|---------------------------------------|------|--------------------------|-----------------------------------------|------------------------------------|
| 0        | 0         | 0                                     | 0.00 | 5.26                     | 0                                       | 1                                  |
| 0.083    | 8         | 546                                   | 1.10 | 4.84                     | 0.083382                                | 1.086957                           |
| 0.167    | 10        | 763                                   | 1.12 | 4.74                     | 0.105361                                | 1.111111                           |
| 0.3      | 21        | 2114                                  | 1.11 | 4.16                     | 0.235722                                | 1.265823                           |
| 0.467    | 41        | 4201                                  | 1.09 | 3.11                     | 0.527633                                | 1.694915                           |
| 0.667    | 57        | 6984                                  | 1.08 | 2.26                     | 0.84397                                 | 2.325581                           |
| 0.833    | 65        | 7856                                  | 1.09 | 1.84                     | 1.049822                                | 2.857143                           |
| 0.917    | 68        | 8360                                  | 1.08 | 1.68                     | 1.139434                                | 3.125                              |
| 1        | 72        | 7717                                  | 1.08 | 1.47                     | 1.272966                                | 3.571429                           |
| 2        | 79        | 9064                                  | 1.08 | 1.11                     | 1.560648                                | 4.761905                           |
| 4        | 84        | 9134                                  | 1.08 | 0.84                     | 1.832581                                | 6.25                               |
| 8        | 88        | 9154                                  | 1.09 | 0.63                     | 2.120264                                | 8.333333                           |

<sup>a</sup>Conditions: **[HL]/[<sup>t</sup>Bu-P<sub>4</sub>]/[BnOH]** = 50/0.1/1, **[HL]<sub>0</sub>** = 5.3 M in THF, T = -25°C. Parallel polymerization reactions were conducted to avoid conversion systematic error induced by aliquot extraction.

**Table S3.** Results of ROP of **HL** by PBs alone<sup>[a]</sup>.

| Run | HL/Cat. | Cat.                           | Conv <sup>[b]</sup> . (%) | $M_n$ <sup>[c]</sup> (kg mol <sup>-1</sup> ) | $\mathcal{D}$ <sup>[c]</sup> |
|-----|---------|--------------------------------|---------------------------|----------------------------------------------|------------------------------|
| 1   | 50/1    | <sup>t</sup> Bu-P <sub>1</sub> | n.d.                      | -                                            | -                            |
| 2   | 50/1    | <sup>t</sup> Bu-P <sub>2</sub> | n.d.                      | -                                            | -                            |
| 3   | 50/1    | <sup>t</sup> Bu-P <sub>4</sub> | 88                        | 613.8                                        | 1.45                         |
| 4   | 100/1   | <sup>t</sup> Bu-P <sub>4</sub> | 87                        | 571.5                                        | 1.40                         |
| 5   | 150/1   | <sup>t</sup> Bu-P <sub>4</sub> | 87                        | 543.4                                        | 1.40                         |
| 6   | 200/1   | <sup>t</sup> Bu-P <sub>4</sub> | 72                        | 598.8                                        | 1.35                         |

[a] Conditions: **HL** = 0.104 g, (0.67 mmol) in THF ( $[\mathbf{HL}]_0 = 5.3$  M) at -25°C; **HL** was dissolved in THF first, followed by addition of PBs; reaction time = 12 h. [b] Monomer conversion were measured by <sup>1</sup>H NMR. [c]  $M_n$  and  $\mathcal{D}$  were determined by GPC at 40°C in THF relative to PMMA standards.

**Table S4.** Kinetic studies of ROP results of **HL** catalyzed by <sup>t</sup>Bu-P<sub>4</sub> alone<sup>a</sup>.

| Time (h) | Conv. (%) | $M_n$ (kg mol <sup>-1</sup> ) | $\mathcal{D}$ | $[\mathbf{M}]_t$ (mol/L) | $\ln([\mathbf{M}]_0/[\mathbf{M}]_t)$ | $[\mathbf{M}]_0/[\mathbf{M}]_t$ |
|----------|-----------|-------------------------------|---------------|--------------------------|--------------------------------------|---------------------------------|
| 0.183    | 9         | 36.5                          | 1.11          | 3.64                     | 0.094311                             | 1.098901                        |
| 0.267    | 10        | 39.2                          | 1.15          | 3.60                     | 0.105361                             | 1.111111                        |
| 0.5      | 11        | 55.5                          | 1.17          | 3.56                     | 0.116534                             | 1.123596                        |
| 1        | 14        | 80.8                          | 1.19          | 3.44                     | 0.150823                             | 1.162791                        |
| 2        | 26        | 166.3                         | 1.26          | 2.96                     | 0.301105                             | 1.351351                        |
| 2.5      | 33        | 199.6                         | 1.31          | 2.68                     | 0.400478                             | 1.492537                        |
| 3        | 39        | 254.5                         | 1.32          | 2.44                     | 0.494296                             | 1.639344                        |
| 4        | 63        | 396.2                         | 1.35          | 1.48                     | 0.994252                             | 2.702703                        |
| 7        | 75        | 502.2                         | 1.45          | 1.00                     | 1.386294                             | 4                               |
| 10       | 84        | 507.8                         | 1.54          | 0.64                     | 1.832581                             | 6.25                            |
| 12       | 84        | 495.7                         | 1.59          | 0.64                     | 1.832581                             | 6.25                            |

<sup>a</sup>Conditions:  $[\mathbf{HL}]/[\sup{t}\text{Bu-P}_4] = 50/1$ ,  $[\mathbf{HL}]_0 = 4.0$  M in THF,  $T = -25^\circ\text{C}$ . Parallel polymerization reactions were conducted to avoid conversion systematic error induced by aliquot extraction.

**Table S5.** Results of ROP of **HL** initiated by varied alkali metal alkoxides<sup>a</sup>.

| Run | Initiator           | HL/Initiator | Time (h) | Conv. <sup>b</sup> (%) | $M_n$ <sup>c</sup> (kg mol <sup>-1</sup> ) | $\mathcal{D}$ <sup>c</sup> |
|-----|---------------------|--------------|----------|------------------------|--------------------------------------------|----------------------------|
| 1   | KOMe                | 50/1         | 48       | 88                     | 330.0                                      | 1.17                       |
| 2   | NaOMe               | 50/1         | 48       | 89                     | 174.9                                      | 1.18                       |
| 3   | KOEt                | 50/1         | 48       | 88                     | 98.3                                       | 1.07                       |
| 4   | NaOEt               | 50/1         | 48       | 87                     | 180.1                                      | 1.15                       |
| 5   | KO <sup>t</sup> Bu  | 50/1         | 48       | 83                     | 27.8                                       | 1.39                       |
| 6   | NaO <sup>t</sup> Bu | 50/1         | 48       | 87                     | 25.8                                       | 1.33                       |
| 7   | LiO <sup>t</sup> Bu | 50/1         | 48       | 16                     | -                                          | -                          |
| 8   | LiOMe               | 50/1         | 48       | -                      | -                                          | -                          |
| 9   | KOMe                | 20/1         | 48       | 89                     | 258.8                                      | 1.30                       |
| 10  | KOMe                | 100/1        | 48       | 89                     | 423.6                                      | 1.28                       |
| 11  | KOMe                | 200/1        | 48       | 87                     | 475.7                                      | 1.24                       |

<sup>a</sup>Conditions: all polymerizations were conducted in THF at -25°C, **HL** = 0.104 g (0.67 mmol),  $[\mathbf{HL}]_0 = 5.0$  M. <sup>b</sup>monomer conversion, determined by <sup>1</sup>H NMR. <sup>c</sup> $M_n$  and dispersity were determined by GPC equipped with RI and MALLS detector at 40°C in THF relative to PMMA standards.

**Table S6.** Results of the 180° peel test for polyHL with different MW and commercial 3M<sup>®</sup> tapes<sup>a</sup>.

|                                        | polyHL_562 | polyHL319 | polyHL_160 | 3M <sup>®</sup> 665 | 3M <sup>®</sup> 810 | 3M <sup>®</sup> 1600 |
|----------------------------------------|------------|-----------|------------|---------------------|---------------------|----------------------|
| Peel strength_1 <sup>b</sup><br>(N/cm) | 3.280      | 3.926     | 1.217      | 2.544               | 1.547               | 0.6220               |
| Peel strength_2 <sup>b</sup><br>(N/cm) | 3.667      | 3.694     | 2.241      | 2.746               | 1.853               | 0.8250               |
| Peel strength_3 <sup>b</sup><br>(N/cm) | 3.586      | 3.756     | 1.025      | 1.976               | 2.175               | 0.9572               |
| Avg. peel strength<br>(N/cm)           | 3.51       | 3.79      | 1.49       | 2.42                | 1.86                | 0.80                 |
| Standard deviation                     | 0.20       | 0.12      | 0.65       | 0.40                | 0.31                | 0.17                 |

Note: <sup>a</sup>Procedures of 180° peel test can be seen above. <sup>b</sup>Three parallel experiments were carried out to calculate the average peel strength and standard deviation.

**Table S7.** Monomer concentration as a function of time at different temperature<sup>a</sup>.

| Time (h) | -25°C    |                   | Time (h) | -16°C    |                   | Time (h) | -9°C     |                   |
|----------|----------|-------------------|----------|----------|-------------------|----------|----------|-------------------|
|          | Conv.(%) | [HL] <sub>t</sub> |          | Conv.(%) | [HL] <sub>t</sub> |          | Conv.(%) | [HL] <sub>t</sub> |
| 1        | 72       | 1.47              | 1        | 71       | 1.53              | 1        | 78       | 1.16              |
| 4        | 74       | 0.84              | 4        | 83       | 0.89              | 4        | 82       | 0.95              |
| 8        | 88       | 0.63              | 8        | 86       | 0.74              | 8        | 82       | 0.95              |
| 12       | 88       | 0.63              | 12       | 86       | 0.74              | 12       | 82       | 0.95              |

<sup>a</sup>Conditions: HL = 0.104 g, [HL]/[<sup>t</sup>Bu-P<sub>4</sub>]/[BnOH] = 50/0.1/1, [HL]<sub>0</sub> = 5.3 M in THF.

**Table S7 continued.** Monomer concentration as a function of time at different temperature<sup>a</sup>.

| Time (h) | 28°C     |                   | Time (h) | 41°C     |                   |
|----------|----------|-------------------|----------|----------|-------------------|
|          | Conv.(%) | [HL] <sub>t</sub> |          | Conv.(%) | [HL] <sub>t</sub> |
| 1        | 64       | 1.89              | 1        | 53       | 2.47              |
| 4        | 64       | 1.89              | 4        | 53       | 2.47              |
| 8        | 64       | 1.89              | 8        | 52       | 2.53              |
| 12       | 65       | 1.84              | 12       | 52       | 2.53              |

<sup>a</sup>Conditions: HL = 0.104 g, [HL]/[<sup>t</sup>Bu-P<sub>4</sub>]/[BnOH] = 50/0.1/1, [HL]<sub>0</sub> = 5.3 M in THF.

**Table S8.** Monomer concentration as a function of time at different temperature.

| Temp (°C) | Conv. <sub>eq</sub> (%) | [HL] <sub>0</sub> | [HL] <sub>eq</sub> | ln[HL] <sub>eq</sub> |
|-----------|-------------------------|-------------------|--------------------|----------------------|
| -25       | 88                      | 5.26              | 0.63               | -0.46                |
| -16       | 86                      | 5.26              | 0.74               | -0.05                |
| -9        | 82                      | 5.26              | 0.95               | 0.61                 |
| 28        | 65                      | 5.26              | 1.84               | 0.93                 |
| 41        | 52                      | 5.26              | 2.53               | -0.31                |

**Table S9.** Summary of the change of enthalpy, change of entropy and  $T_c$  of the ROP of 6-membered alkyl-substituted lactones.

| Monomer                      | $\Delta H_p^\circ$ (kJ/mol) | $\Delta S_p^\circ$<br>(J mol <sup>-1</sup> K <sup>-1</sup> ) | $[M]_0$ | $T_c$ (°C)  | Reference        |
|------------------------------|-----------------------------|--------------------------------------------------------------|---------|-------------|------------------|
| <b>HL</b>                    | <b>-13.1</b>                | <b>-49.1</b>                                                 | 1.0 M   | <b>-5.9</b> | <b>This work</b> |
| <b><math>\delta 0</math></b> | -8.4                        | -14.7                                                        | 1.0 M   | 158         | <b>2</b>         |
| <b><math>\alpha 1</math></b> | -13.0                       | -34                                                          | 1.0 M   | 109         | <b>3</b>         |
| <b><math>\delta 1</math></b> | -19.3                       | -62                                                          | 1.0 M   | 38          | <b>3</b>         |
| <b><math>\delta 2</math></b> | -16.4                       | -55                                                          | 1.0 M   | 25          | <b>3</b>         |

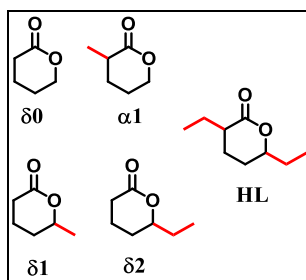

**Note:** the thermodynamic parameters for **HL** and  **$\delta 0$**  were acquired in solution polymerization, whereas those of  **$\alpha 1$** ,  **$\delta 1$**  and  **$\delta 2$**  were calculated in bulk polymerization, which cannot be compared directly, because of the effect of solvation. Furthermore, the ceiling temperature of varied monomers calculated were merely a result of linear extrapolation according to Dainton's equation. However, we suppose that the results can provide theoretical guidance to better understand the trend how alkyl substituents effect the ROP thermodynamics for different monomers.

**Table S10.** Results of chemical recycling of **polyHL**<sup>a</sup>.

| Run       | Cat.                                              | Temp. (°C) | Time (h) | Solvent                    | HL Recovery <sup>b</sup> (%) |
|-----------|---------------------------------------------------|------------|----------|----------------------------|------------------------------|
| <b>1</b>  | AgCF <sub>3</sub> SO <sub>3</sub>                 | 120        | 24       | TOL                        | -                            |
| <b>2</b>  | Cu(CF <sub>3</sub> SO <sub>3</sub> ) <sub>2</sub> | 120        | 24       | TOL                        | -                            |
| <b>3</b>  | Fe(CF <sub>3</sub> SO <sub>3</sub> ) <sub>3</sub> | 120        | 24       | TOL                        | 53                           |
| <b>4</b>  | Sc(CF <sub>3</sub> SO <sub>3</sub> ) <sub>3</sub> | 120        | 24       | TOL                        | 27                           |
| <b>5</b>  | Y(CF <sub>3</sub> SO <sub>3</sub> ) <sub>3</sub>  | 120        | 24       | TOL                        | -                            |
| <b>6</b>  | FeCl <sub>2</sub>                                 | 150        | 12       | mesitylene                 | 21                           |
| <b>7</b>  | Fe(acac) <sub>2</sub>                             | 150        | 12       | mesitylene                 | -                            |
| <b>8</b>  | Sn(Oct) <sub>2</sub>                              | 150        | 12       | mesitylene                 | 5                            |
| <b>9</b>  | DBTDL                                             | 150        | 12       | mesitylene                 | -                            |
| <b>10</b> | <sup>t</sup> Bu-P <sub>4</sub>                    | 150        | 12       | mesitylene                 | -                            |
| <b>11</b> | ZnCl <sub>2</sub>                                 | 130        | 12       | TOL                        | 31                           |
| <b>12</b> | ZnCl <sub>2</sub>                                 | 140        | 12       | TOL                        | 39                           |
| <b>13</b> | ZnCl <sub>2</sub>                                 | 150        | 12       | TOL                        | 54                           |
| <b>14</b> | ZnCl <sub>2</sub>                                 | 150        | 12       | <i>o</i> -DCB <sup>c</sup> | 91                           |
| <b>15</b> | ZnCl <sub>2</sub>                                 | 160        | 12       | <i>o</i> -DCB <sup>c</sup> | 100                          |

<sup>a</sup>Conditions: the chemical recycling procedures were performed in the presence of a catalyst (5.0 mol%) under nitrogen atmosphere.  $[HL]_0 = 0.5$  M; polyHL samples employed were cyclic polymers with  $M_n$  in a range of 300-400 kg mol<sup>-1</sup>. <sup>b</sup>HL recovery was determined by <sup>1</sup>H NMR; <sup>c</sup>*o*-DCB = 1,2-dichlorobenzene.

**Table S11.** Results of chemical recycling of **polyHL** by La catalyst<sup>a</sup>.

| Run | Cat.                                                 | Temp. (°C) | [HL] <sub>0</sub> (mol/L) | Time (h) | Solvent | HL Recovery <sup>b</sup> (%) |
|-----|------------------------------------------------------|------------|---------------------------|----------|---------|------------------------------|
| 1   | La[N(SiMe <sub>3</sub> ) <sub>2</sub> ] <sub>3</sub> | 50         | 0.5                       | 3        | TOL     | 47                           |
| 2   | La[N(SiMe <sub>3</sub> ) <sub>2</sub> ] <sub>3</sub> | 50         | 0.5                       | 12       | TOL     | 81                           |
| 3   | La[N(SiMe <sub>3</sub> ) <sub>2</sub> ] <sub>3</sub> | 50         | 0.5                       | 24       | TOL     | 88                           |
| 4   | La[N(SiMe <sub>3</sub> ) <sub>2</sub> ] <sub>3</sub> | 50         | 0.1                       | 3        | TOL     | 34                           |
| 5   | La[N(SiMe <sub>3</sub> ) <sub>2</sub> ] <sub>3</sub> | 50         | 0.1                       | 24       | TOL     | 87                           |
| 6   | La[N(SiMe <sub>3</sub> ) <sub>2</sub> ] <sub>3</sub> | 80         | 0.5                       | 3        | TOL     | 85                           |
| 7   | La[N(SiMe <sub>3</sub> ) <sub>2</sub> ] <sub>3</sub> | 80         | 0.5                       | 12       | TOL     | 85                           |
| 8   | La[N(SiMe <sub>3</sub> ) <sub>2</sub> ] <sub>3</sub> | 80         | 0.1                       | 3        | TOL     | 93                           |
| 9   | La[N(SiMe <sub>3</sub> ) <sub>2</sub> ] <sub>3</sub> | 80         | 0.1                       | 12       | TOL     | 100                          |

<sup>a</sup>Conditions: the chemical recycling procedures were performed in the presence of **La** (3.0 mol%) under nitrogen atmosphere. **polyHL** samples employed were cyclic polymers with  $M_n$  in a range of 300-400 kg mol<sup>-1</sup>. <sup>b</sup>**HL** recovery was determined by <sup>1</sup>H NMR.

**Table S12.** Verification of the effect of the water content and competitive initiation of the ROP system

| Run              | HL/Cat./Ini. | Catalyst                       | Initiator | Temp.(°C) | Time (h) | [HL] <sub>0</sub> (M) | Conv. <sup>[d]</sup> (%) | $M_n$ <sup>[e]</sup> (g mol <sup>-1</sup> ) | $\mathcal{D}$ <sup>[e]</sup> |
|------------------|--------------|--------------------------------|-----------|-----------|----------|-----------------------|--------------------------|---------------------------------------------|------------------------------|
| 1 <sup>[a]</sup> | 40/1/0       | <sup>t</sup> Bu-P <sub>4</sub> | –         | -25       | 12       | 5.3                   | 0                        | –                                           | –                            |
| 2 <sup>[b]</sup> | 80/1/1       | <sup>t</sup> Bu-P <sub>4</sub> | BnOH      | -25       | 12       | 5.3                   | 21                       | 17938                                       | 2.26                         |
| 3 <sup>[c]</sup> | 50/0/1       | –                              | PhCOOK    | -25       | 24       | 5.0                   | 0                        | –                                           | –                            |
| 4 <sup>[c]</sup> | 50/0/1       | –                              | HCOOCs    | -25       | 24       | 5.0                   | 0                        | –                                           | –                            |
| 5 <sup>[c]</sup> | 50/0/1       | –                              | KOAc      | 30        | 24       | 5.0                   | 0                        | –                                           | –                            |
| 6 <sup>[c]</sup> | 50/0/(1/1)   | –                              | KOAc/BnOH | 30        | 24       | 5.0                   | 0                        | –                                           | –                            |

Conditions: <sup>[a]</sup> the **HL** utilized was directly used without any drying procedures. <sup>[b]</sup> The water content of **HL** was deliberately controlled at ~100 ppm. <sup>[c]</sup> The **HL** was rigorously dried prior to use. <sup>[d]</sup> Monomer conversion were measured by <sup>1</sup>H NMR. <sup>[e]</sup>  $M_n$  and  $\mathcal{D}$  were determined by GPC at 40°C in THF relative to PMMA standards.

**Table S13.** Calculated energy data of four deprotonated-HL structures (G: Sum of electronic and thermal Free Energies. H: Sum of electronic and thermal Enthalpies. HF: Sum of electronic and zero-point Energies).

| Gas         | CO-H-OR            | CO-H-OS            | O-H-COR            | O-H-COS            |
|-------------|--------------------|--------------------|--------------------|--------------------|
| <b>G</b>    | -502.478557        | -502.473909        | -502.436561        | -502.439019        |
| <b>H</b>    | -502.427549        | -502.423121        | -502.385515        | -502.388633        |
| <b>HF</b>   | -502.663531        | -502.659301        | -502.620766        | -502.623949        |
| <b>G-HF</b> | 0.184974           | 0.185392           | 0.184205           | 0.184930           |
| <b>H-HF</b> | 0.235982           | 0.236180           | 0.235251           | 0.235316           |
| <b>THF</b>  | <b>CO-H-OR-thf</b> | <b>CO-H-OS-thf</b> | <b>O-H-COR-thf</b> | <b>O-H-COS-thf</b> |
| <b>HF</b>   | -502.737671        | -502.733974        | -502.694545        | -502.696591        |
| <b>G</b>    | -502.552697        | -502.548582        | -502.510340        | -502.511661        |
| <b>H</b>    | -502.501689        | -502.497794        | -502.459294        | -502.461275        |



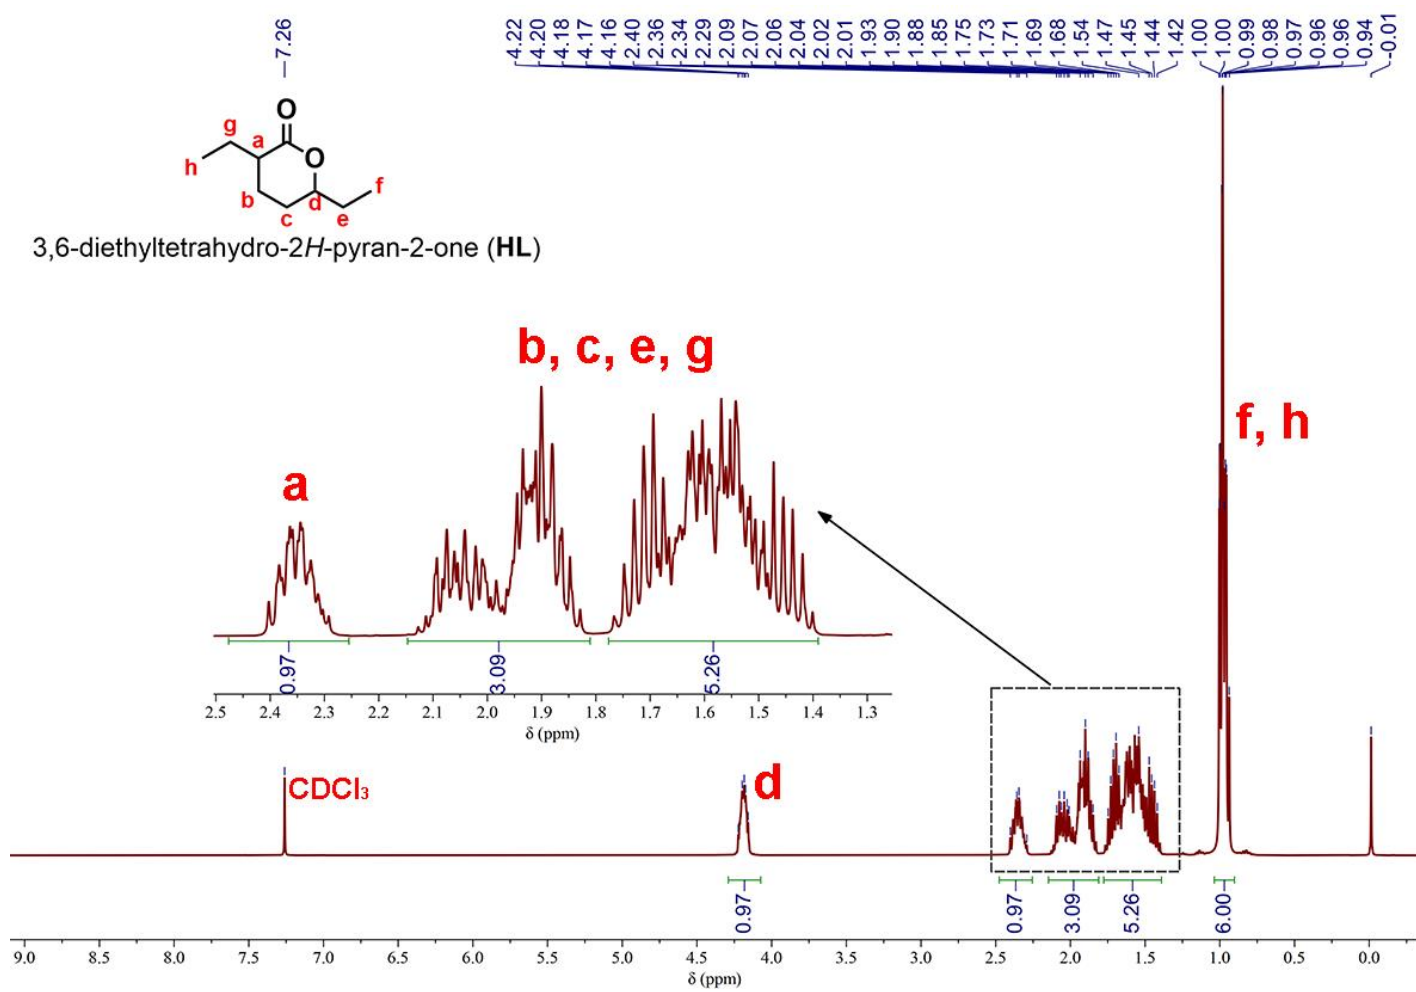

**Figure S1.** <sup>1</sup>H NMR spectrum of **HL** monomer (CDCl<sub>3</sub>, 500 MHz, 25°C).

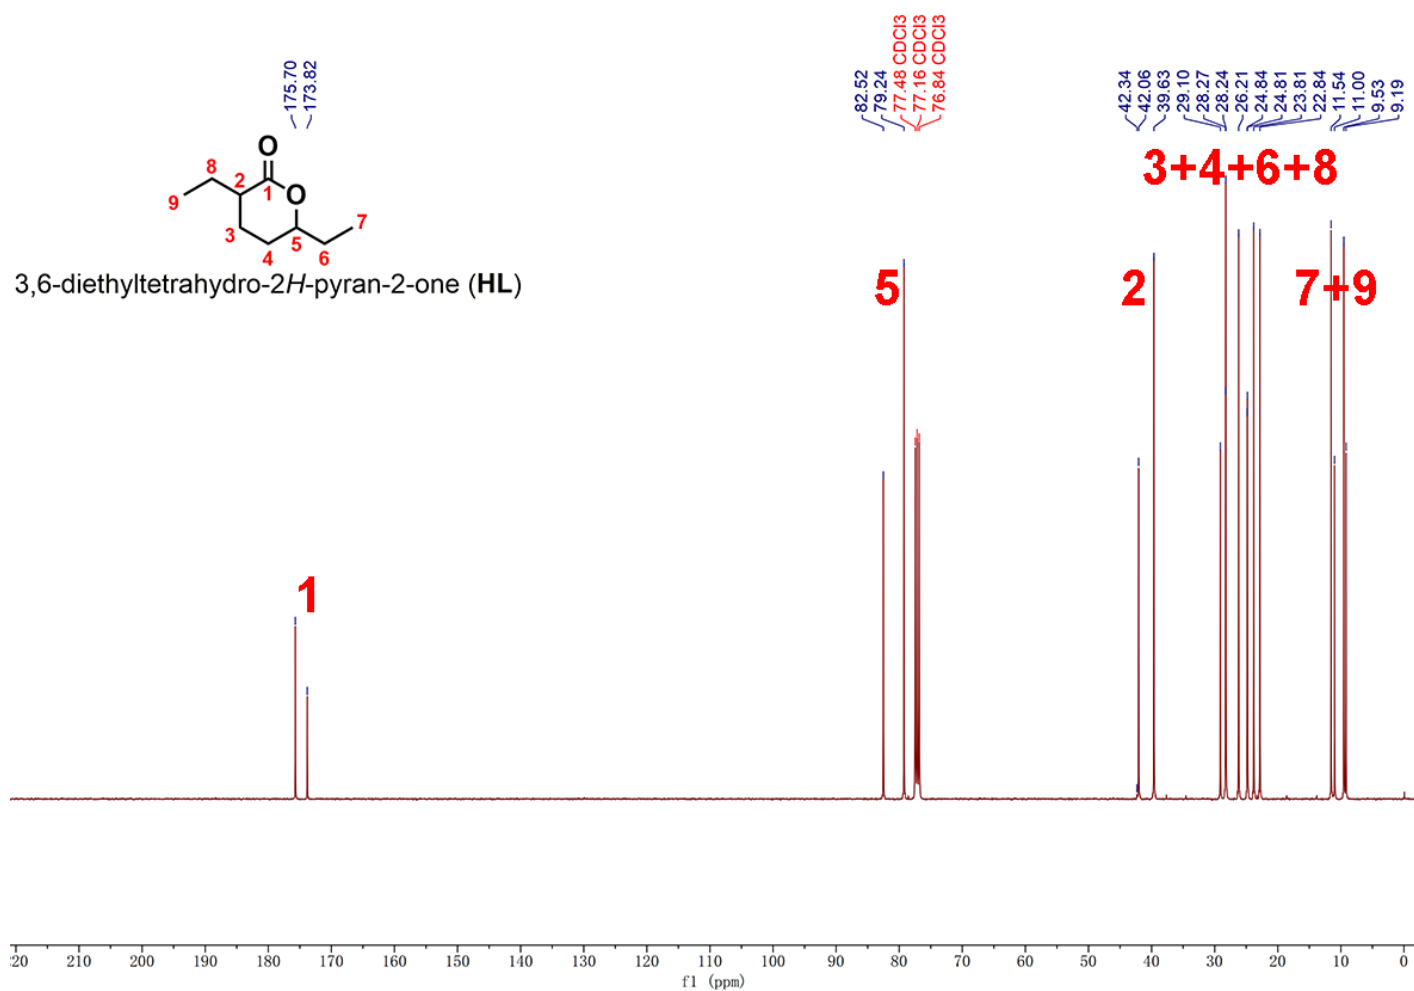

**Figure S2.**  $^{13}\text{C}$  NMR spectrum of **HL** monomer (CDCl<sub>3</sub>, 125 MHz, 25°C). The **HL** obtained was a 63/37 diastereomeric mixture according to the  $^{13}\text{C}$  NMR spectrum.

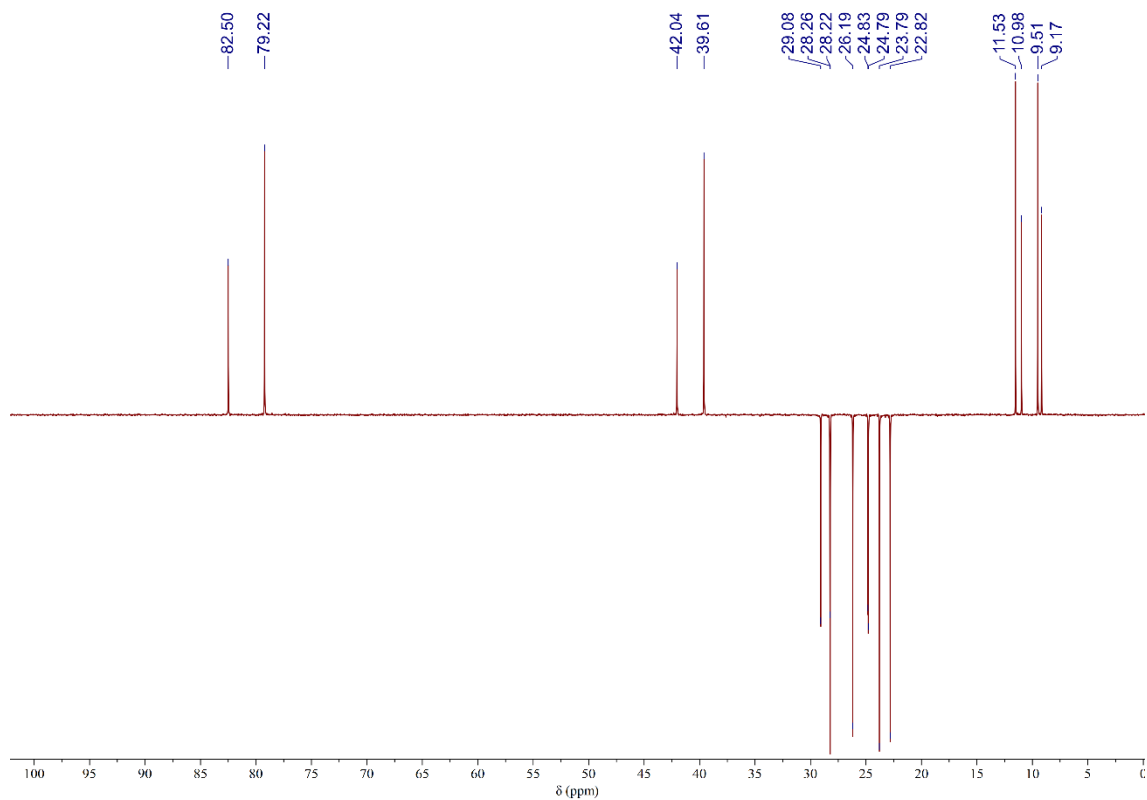

**Figure S3.** DEPT-135 spectrum of **HL** monomer (CDCl<sub>3</sub>, 125 MHz, 25°C). The inverted peaks assign to methylene carbon signals.

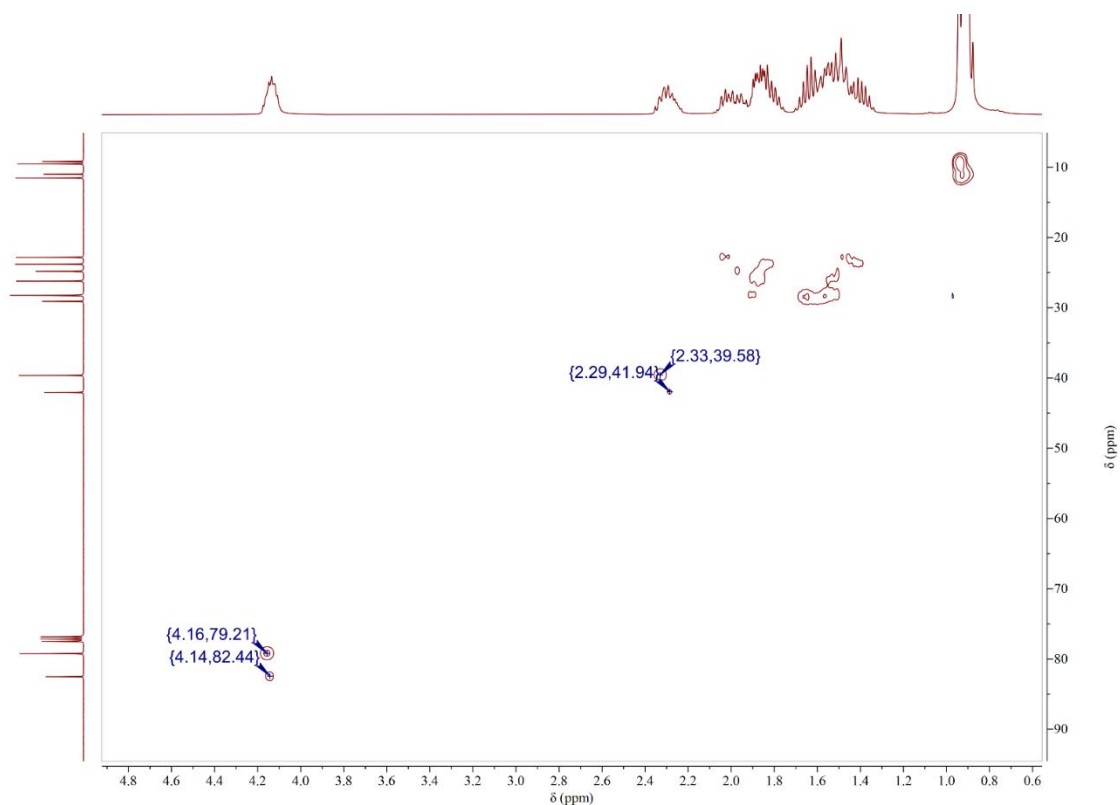

**Figure S4.**  $^1\text{H}$ - $^{13}\text{C}$  HSQC spectrum of **HL** monomer ( $\text{CDCl}_3$ ,  $25^\circ\text{C}$ ). Each of the characteristic methine proton signals correspond to two adjacent carbon signals in  $^{13}\text{C}$  NMR spectrum, which again confirmed the existence of two pairs of diastereoisomers.

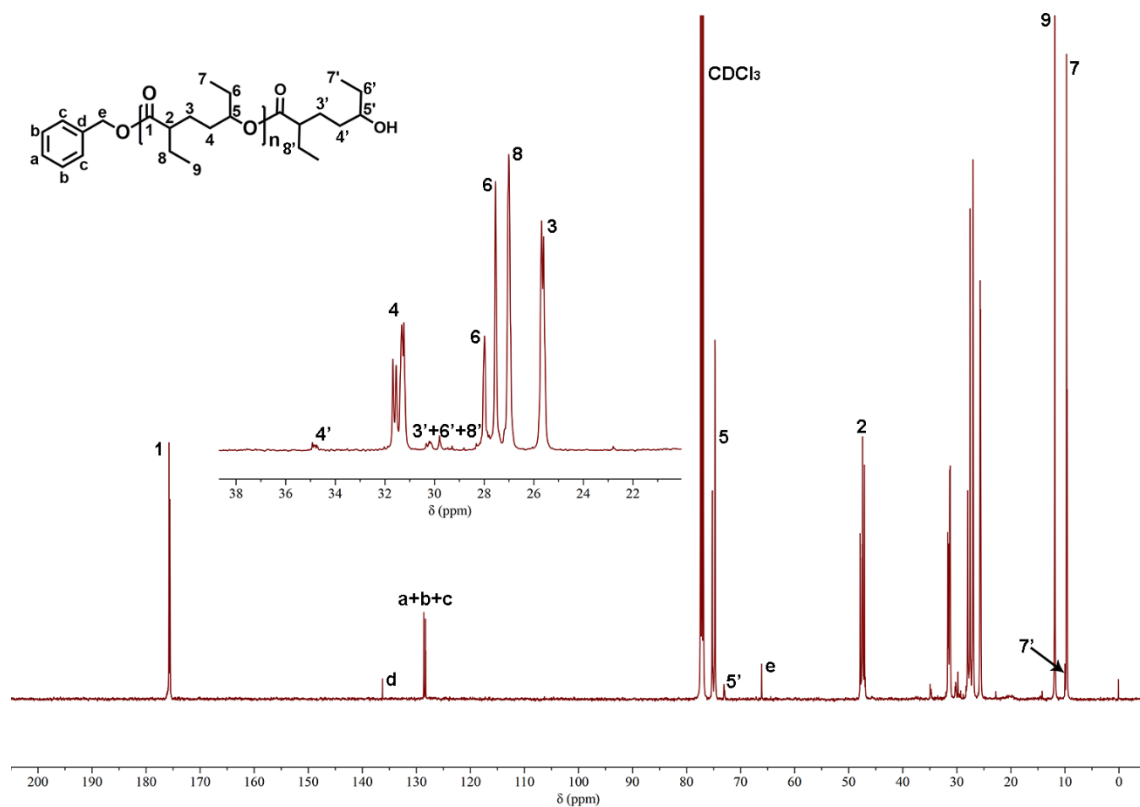

**Figure S5.** <sup>13</sup>C NMR spectrum of polyHL produced at a ratio of [HL]/[<sup>t</sup>Bu-P<sub>4</sub>]/[BnOH] = 25/0.1/1 (CDCl<sub>3</sub>, 125 MHz, 25°C).  $M_n = 4.1 \text{ kg mol}^{-1}$ ,  $D = 1.11$ .

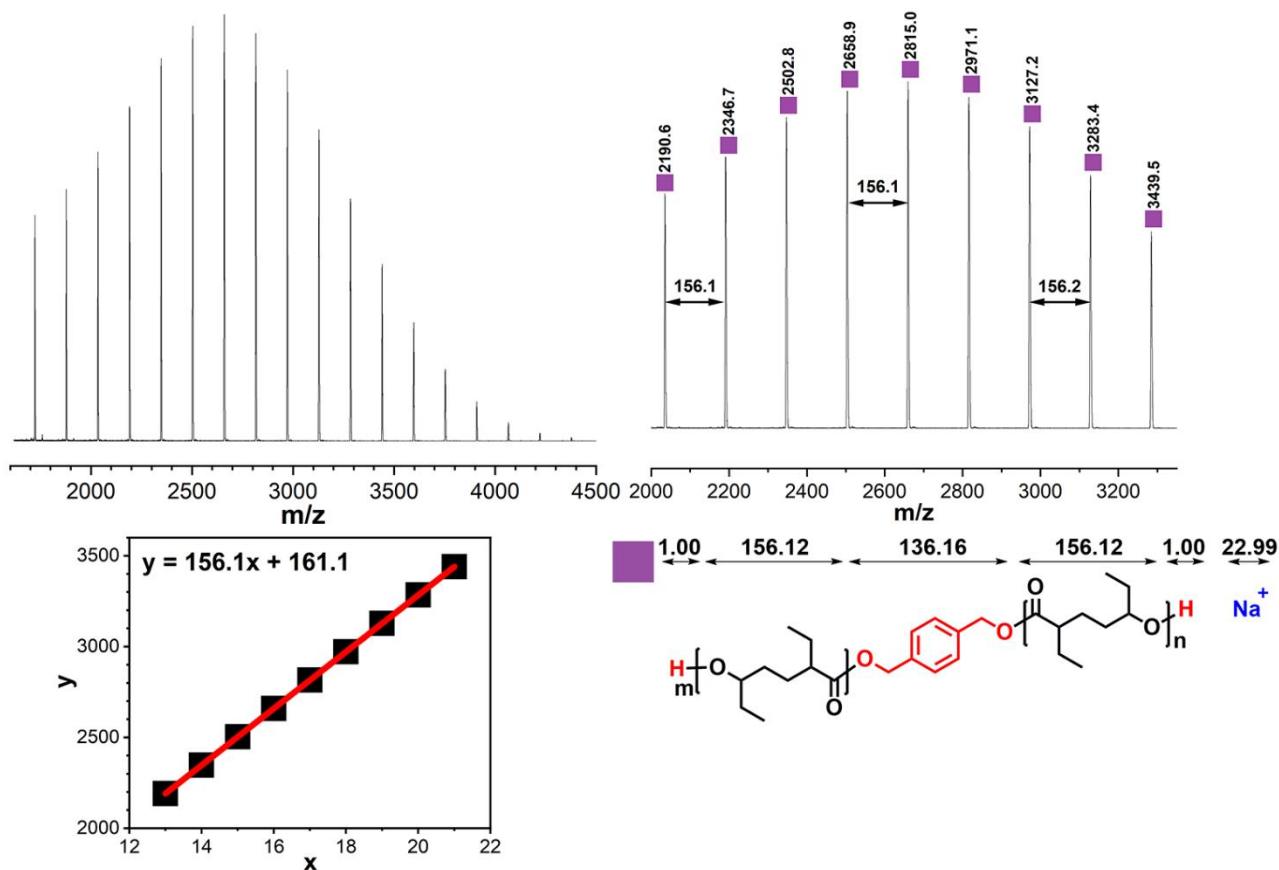

**Figure S6.** MALDI-TOF mass spectra of polyHL produced by  $[\text{HL}]/[\text{'Bu-P}_4]/[1,4\text{-BDM}] = 15/0.5/1$ ,  $[\text{HL}]_0 = 5.3 \text{ M}$  in THF,  $T = -25^\circ\text{C}$ . Monomer conversion = 83%.  $M_n$  (GPC) =  $3.75 \text{ kg mol}^{-1}$ ,  $D = 1.13$ .

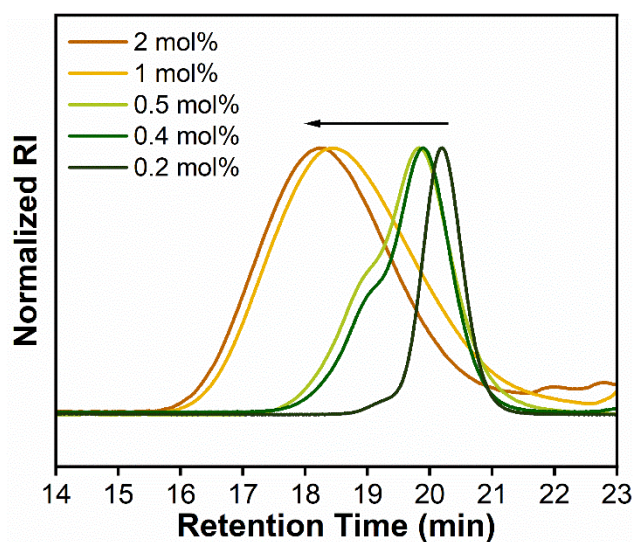

**Figure S7.** GPC traces of polyHL produced by different loading of 'Bu-P<sub>4</sub>.  $[\text{HL}]/[\text{BnOH}] = 50/1$ . As the loading of the phosphazene base increases, bimodal distribution came out.

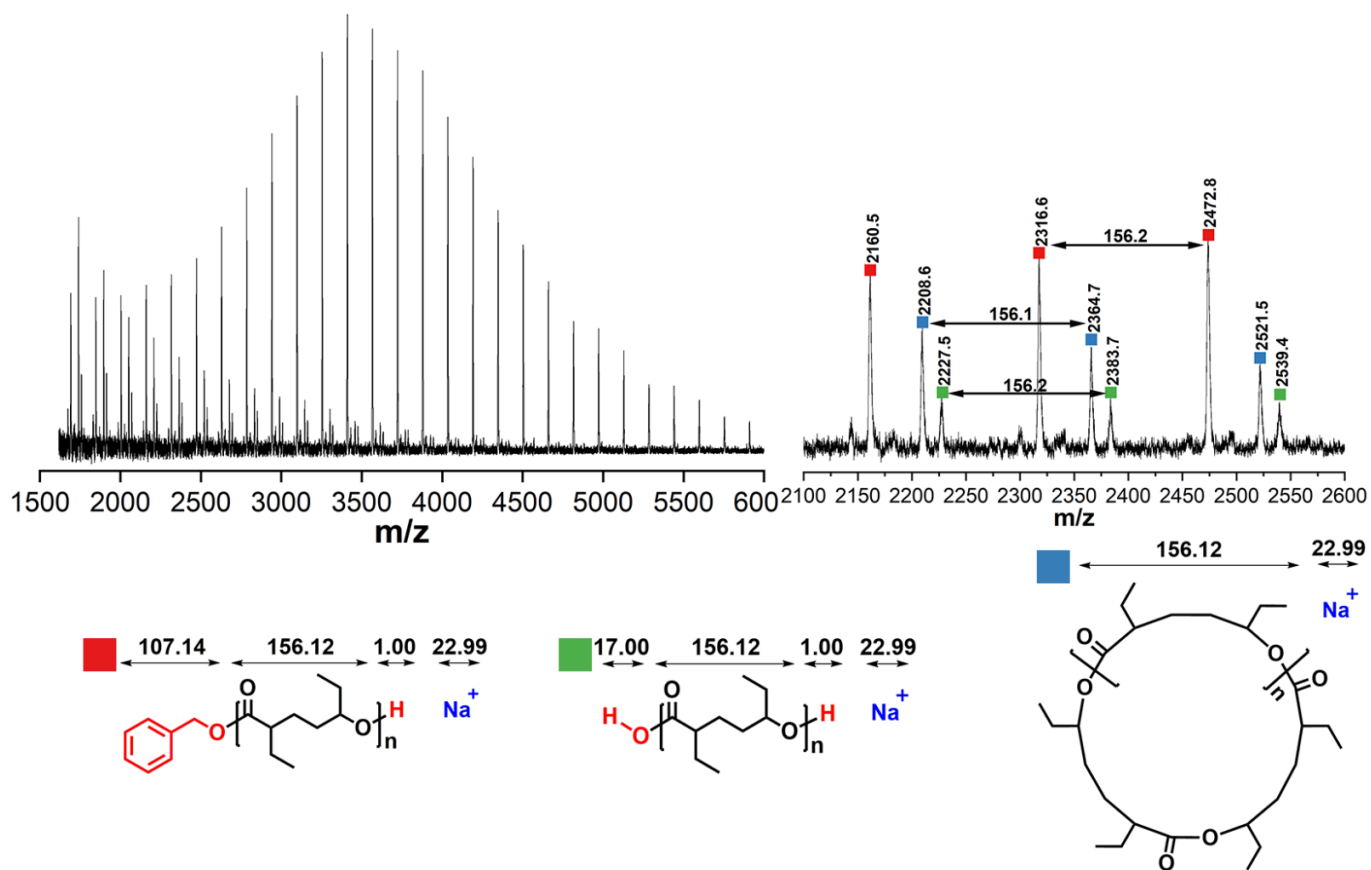

**Figure S8.** MALDI-TOF mass spectra of polyHL produced by  $[\text{HL}]/[\text{tBu-P}_4]/[\text{BnOH}] = 50/0.5/1$ ,  $[\text{HL}]_0 = 5.3$  M in THF,  $T = -25^\circ\text{C}$ . To generate low MW polymer, the reaction was quenched at low monomer conversion.

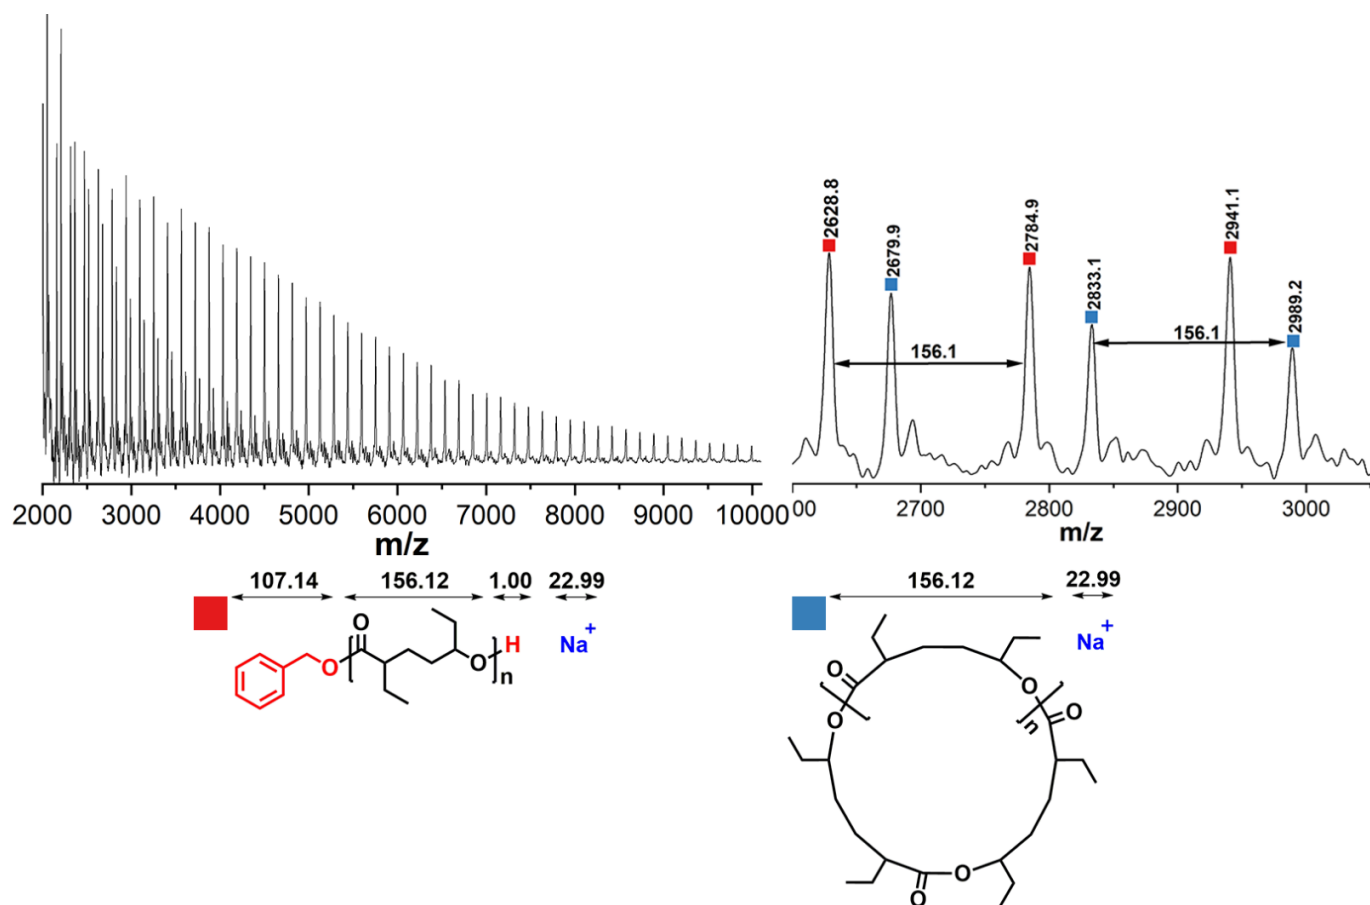

**Figure S9.** MALDI-TOF mass spectra of polyHL produced by [HL]/[<sup>t</sup>Bu-P<sub>4</sub>]/[BnOH] = 50/1/1, [HL]<sub>0</sub> = 5.3 M in THF, *T* = -25°C. To generate low MW polymer, the reaction was quenched at low monomer conversion.



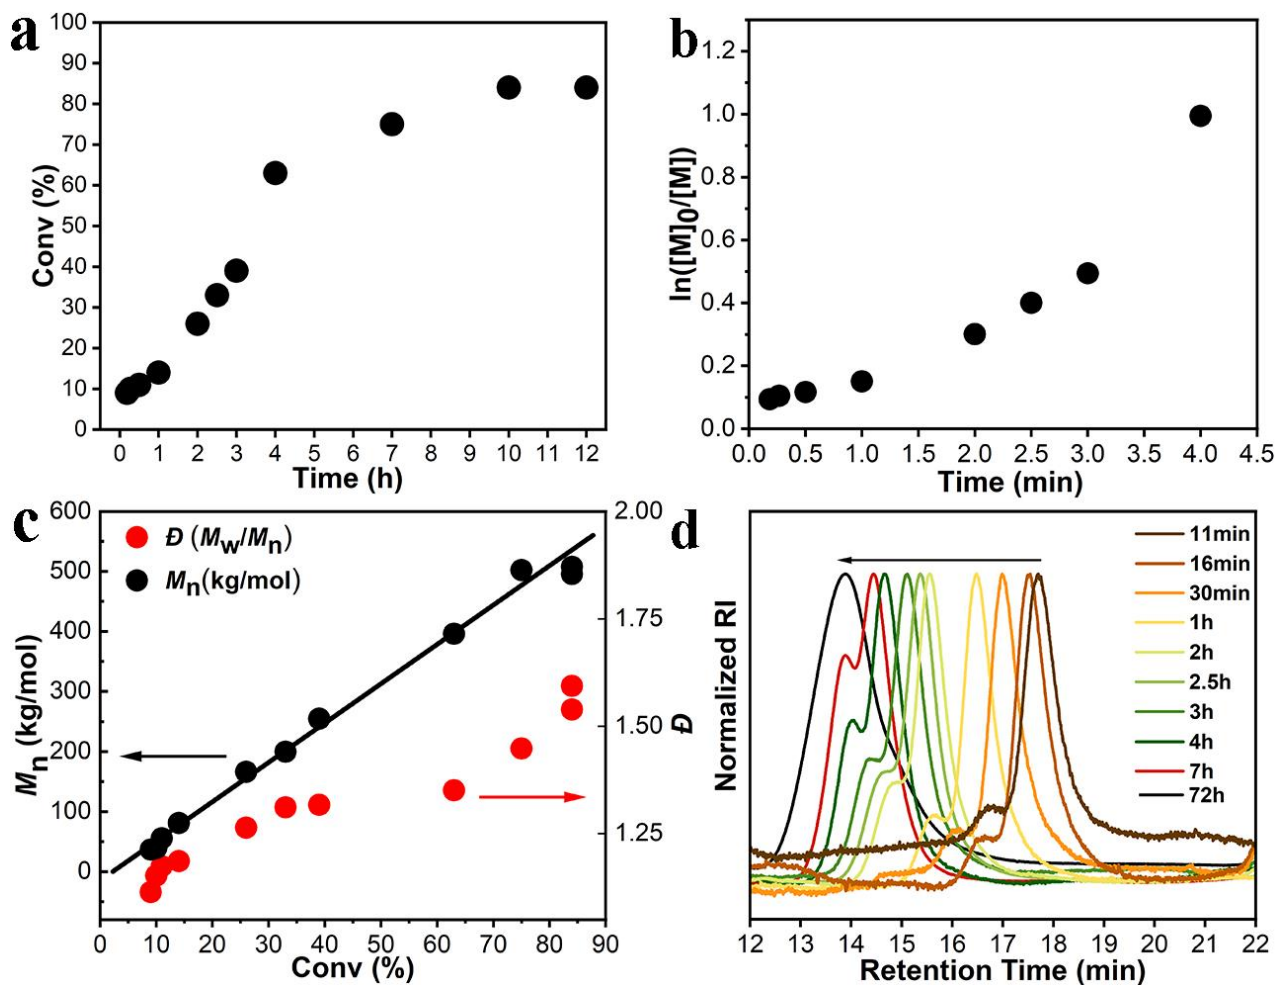

**Figure S10.** ROP of HL catalyzed by *t*Bu-P<sub>4</sub> alone. (a) Plot of HL conversion versus time. (b) Semilogarithmic kinetic plots of  $\ln([M]/[M]_0)$  versus time. (c) Plot of molecular weight ( $M_n$ ) and  $\bar{D}$  versus HL conversion. (d) GPC traces of polyHL obtained at different polymerization time.  $[\text{HL}]/[\text{tBu-P}_4] = 50/1$ ,  $[\text{HL}]_0 = 4.0 \text{ M}$  in THF,  $T = -25^\circ\text{C}$ .

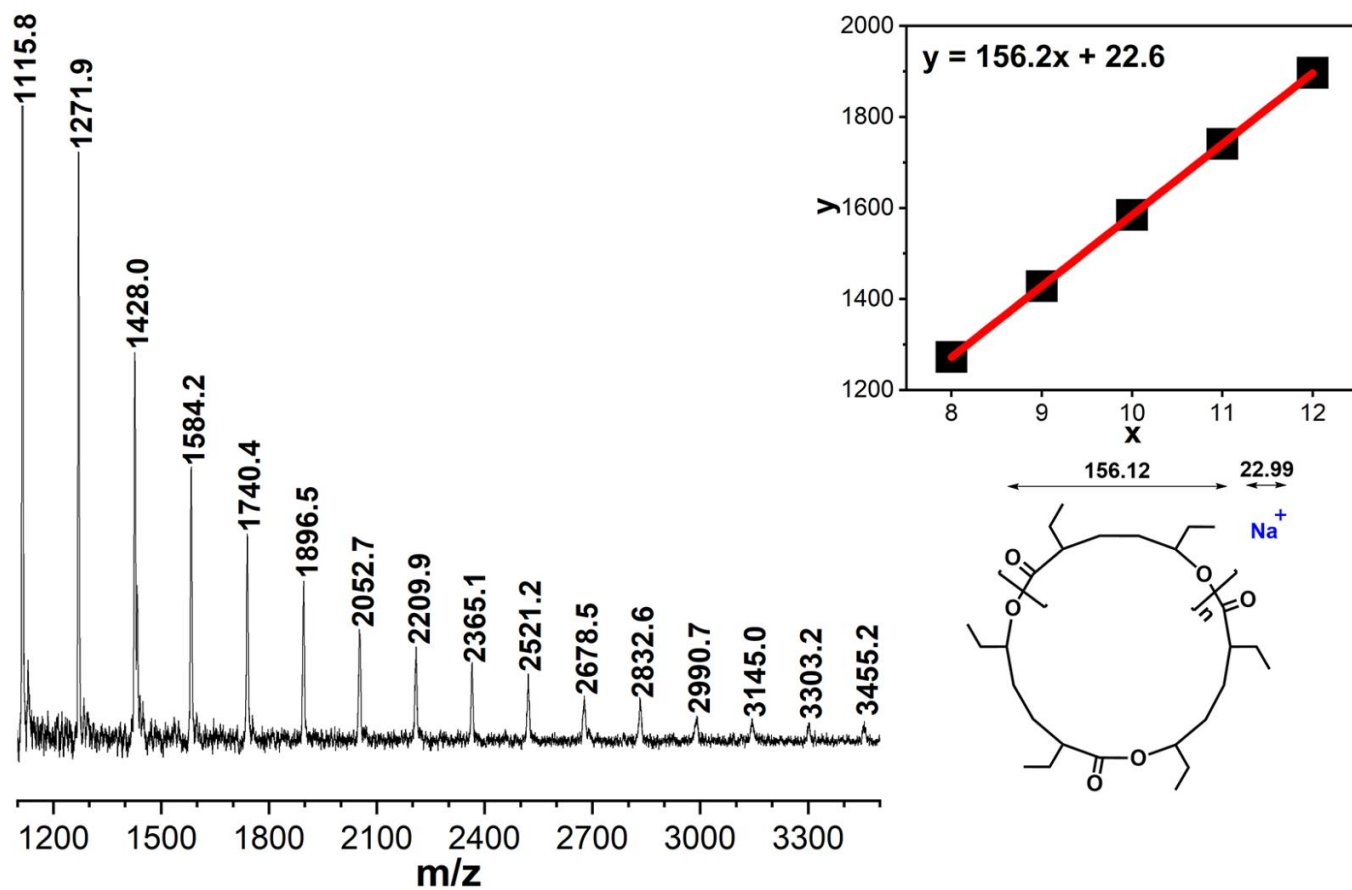

**Figure S11.** MALDI-TOF mass spectra of polyHL produced by  $[\text{HL}]/[\text{t-Bu-P}_4]/[\text{BnOH}] = 50/1/0$ ,  $[\text{HL}]_0 = 4.0$  M in THF,  $T = -25^\circ\text{C}$ . To generate low MW polymer, the reaction was quenched at low monomer conversion.

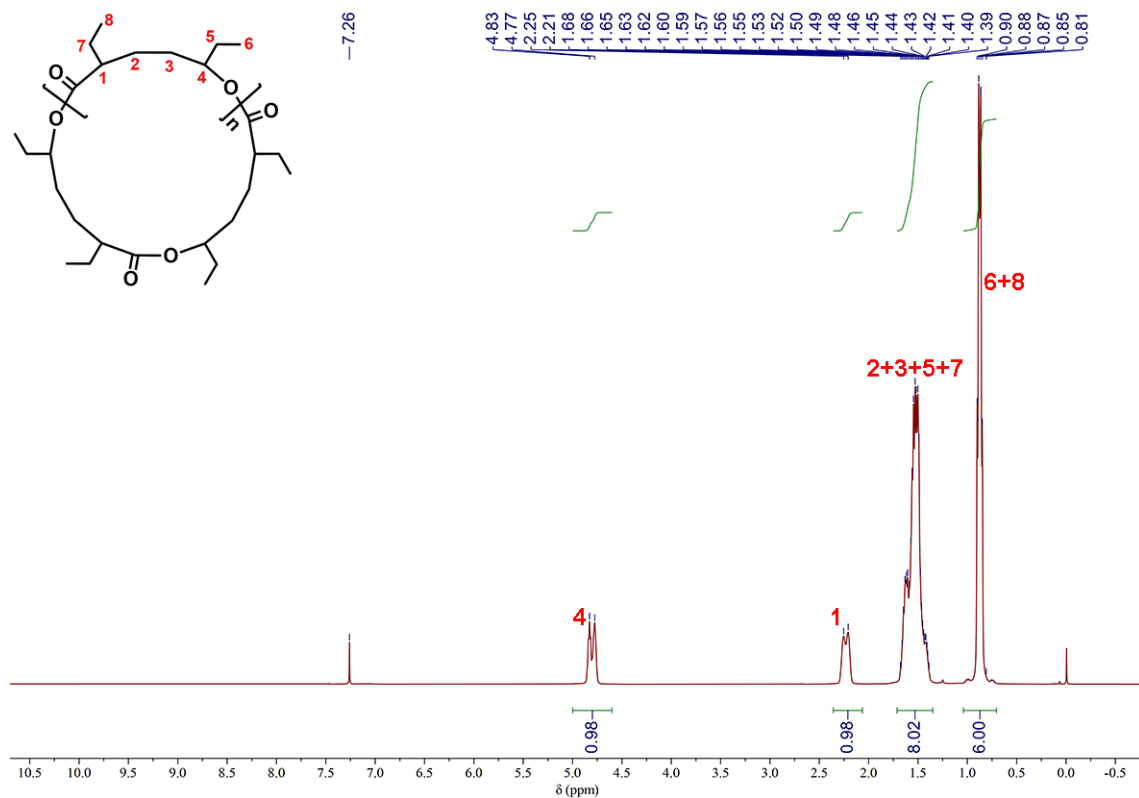

**Figure S12.** <sup>1</sup>H NMR spectrum of cyclic polyHL produced at a ratio of [HL]/[tBu-P<sub>4</sub>] = 50/1, (CDCl<sub>3</sub>, 500 MHz, 25°C).

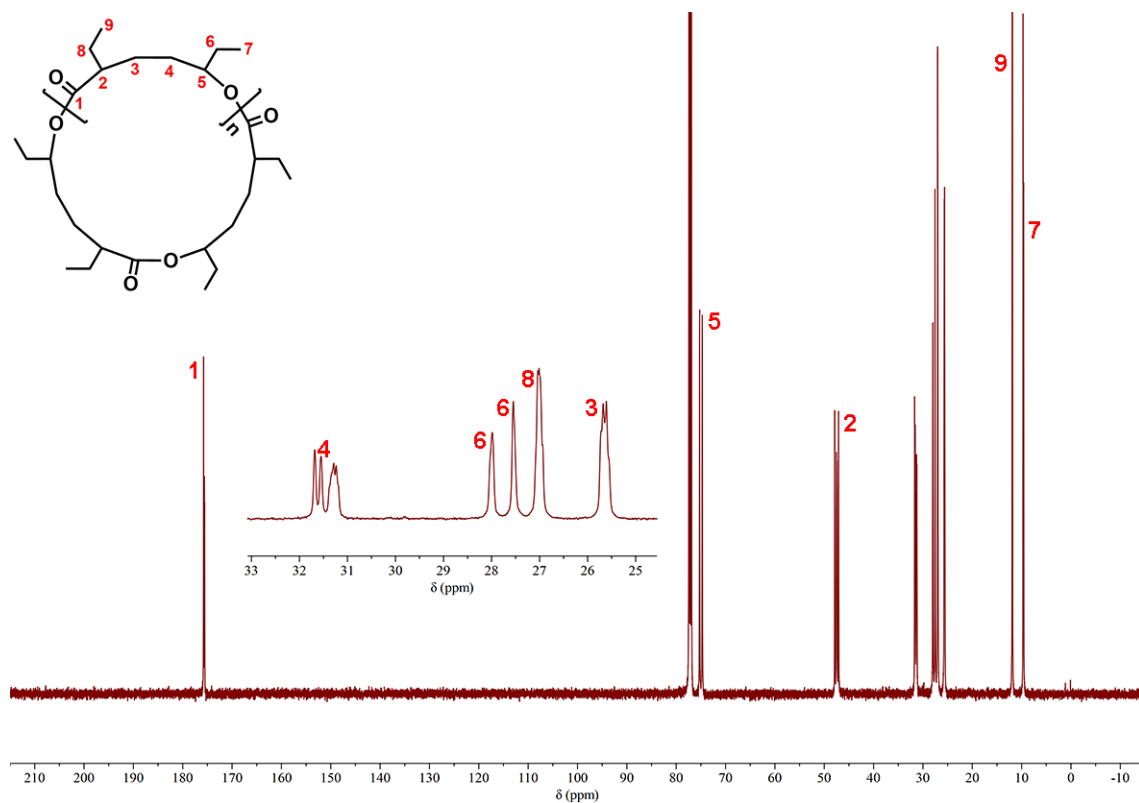

**Figure S13.**  $^{13}\text{C}$  NMR spectrum of cyclic polyHL produced at a ratio of  $[\text{HL}]/[\text{tBu-P}_4] = 50/1$ , ( $\text{CDCl}_3$ , 125MHz,  $25^\circ\text{C}$ ).

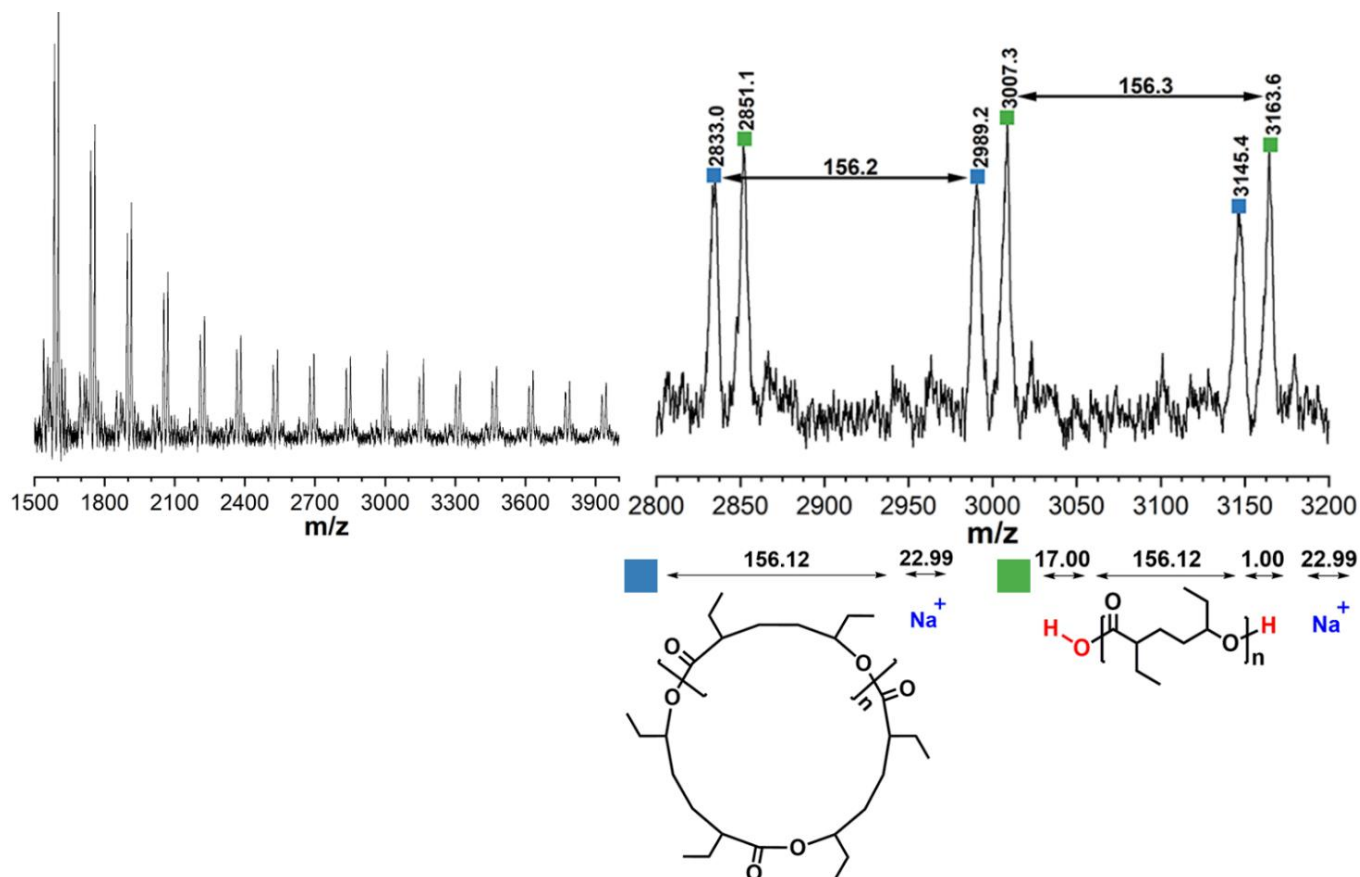

**Figure S14.** MALDI-TOF mass spectra of polyHL produced by [HL]/[*t*Bu-P<sub>4</sub>]/[BnOH] = 50/1/0, [HL]<sub>0</sub> = 4.0 M in THF, *T* = -25°C. To generate low MW polymer, the reaction was quenched at low monomer conversion. The water initiated linear mass peak was detected because the HL monomer employed in this reaction was not rigorously dried. The water content of HL monomer was estimated to be ~100 ppm by Karl Fischer moisture titrator.

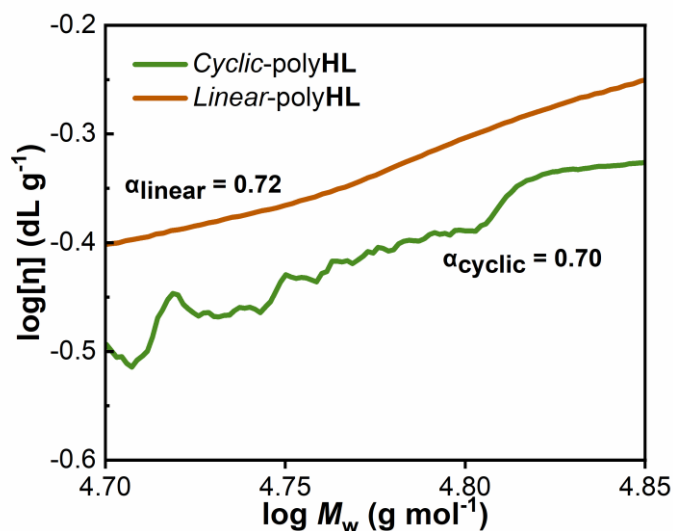

**Figure S15.** Mark-Houwink plots of the linear (brown line) and cyclic polyHLs (green line). The Mark-Houwink exponent  $\alpha$  was also calculated and exhibited. The putative cyclic polyHL was synthesized at a ratio of [HL]/[*t*Bu-P<sub>4</sub>]/[BnOH] = 20/1/0 in THF ([HL]<sub>0</sub> = 4.0 M) at -25°C for 1 h, and the resultant polyHL had a  $M_n = 52036 \text{ g mol}^{-1}$ ,  $\mathcal{D} = 1.184$ ; whereas the linear polyHL acted as a counterpart was prepared at a ratio of [HL]/[*t*Bu-P<sub>4</sub>]/[BnOH] = 300/0.3/1 in THF ([HL]<sub>0</sub> = 4.0 M) at -25°C for 48 h. The linear polyHL had a  $M_n = 56856 \text{ g mol}^{-1}$ ,  $\mathcal{D} = 1.071$ .

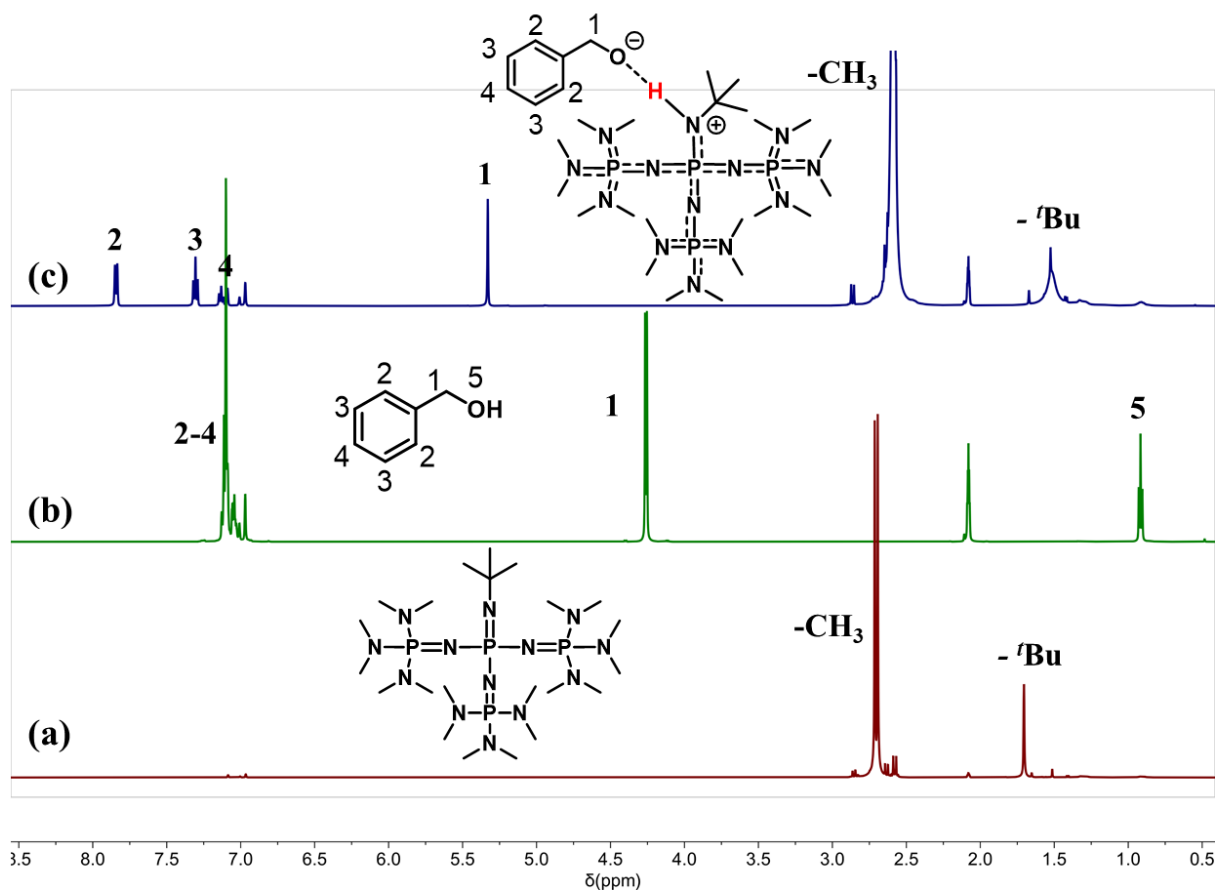

**Figure S16.**  $^1\text{H}$  NMR spectrum (toluene- $d_8$ , 500 MHz, 25°C): (a)  $t\text{Bu-P}_4$ ; (b)  $\text{BnOH}$ ; (c)  $[t\text{Bu-P}_4]/[\text{BnOH}] = 1/1$ . The NMR spectra were collected after sufficiently oscillation in order to assure the reaction stoichiometric was complete. The proton signal in  $[t\text{Bu-P}_4\text{H}^+\cdots\text{OBn}]$  was not detected, this should be attributed to the rapid proton exchange at 25°C.

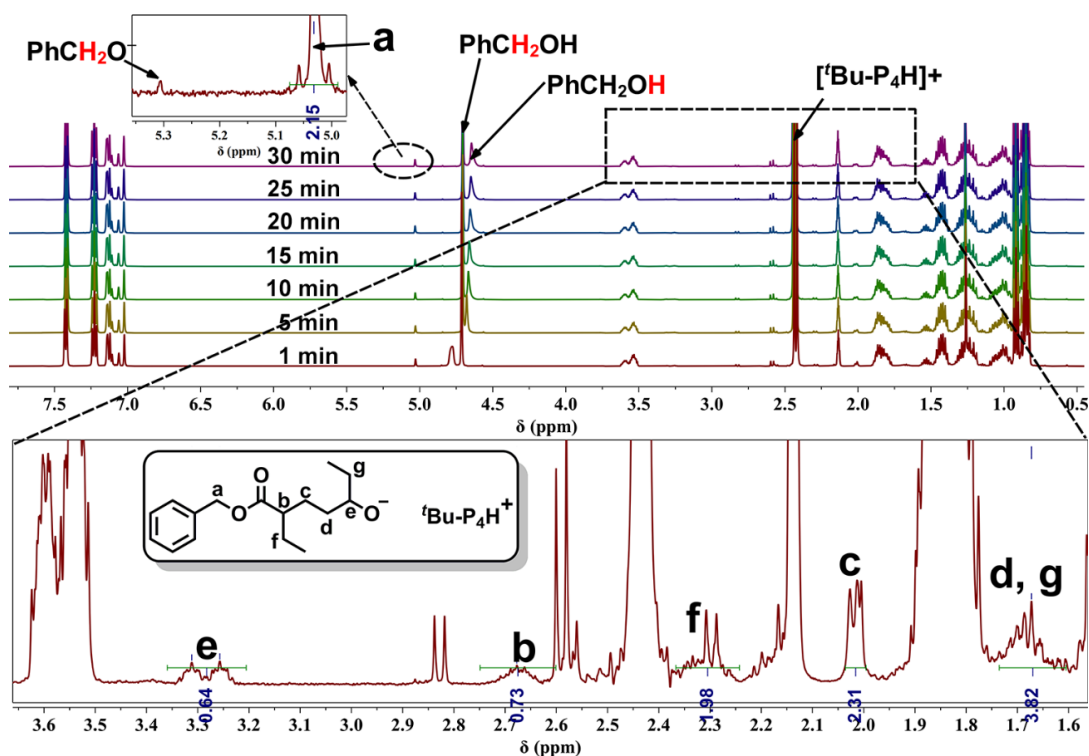

**Figure S17.** *In-situ*  $^1\text{H}$  NMR spectroscopies of chain-initiation stage at a ratio of  $[\text{HL}]/[\text{BnOH}] = 1/1$  catalyzed by 10 mol% of  $^t\text{Bu-P}_4$  (toluene- $d_8$ , 500 MHz, 25°C). The *in-situ*  $^1\text{H}$  NMR spectra were gathered immediately at one-minute intervals for the very first 30 min (top, partially showed). The assignment of putative ring-opened intermediate detected in the  $^1\text{H}$  NMR spectroscopy (bottom).

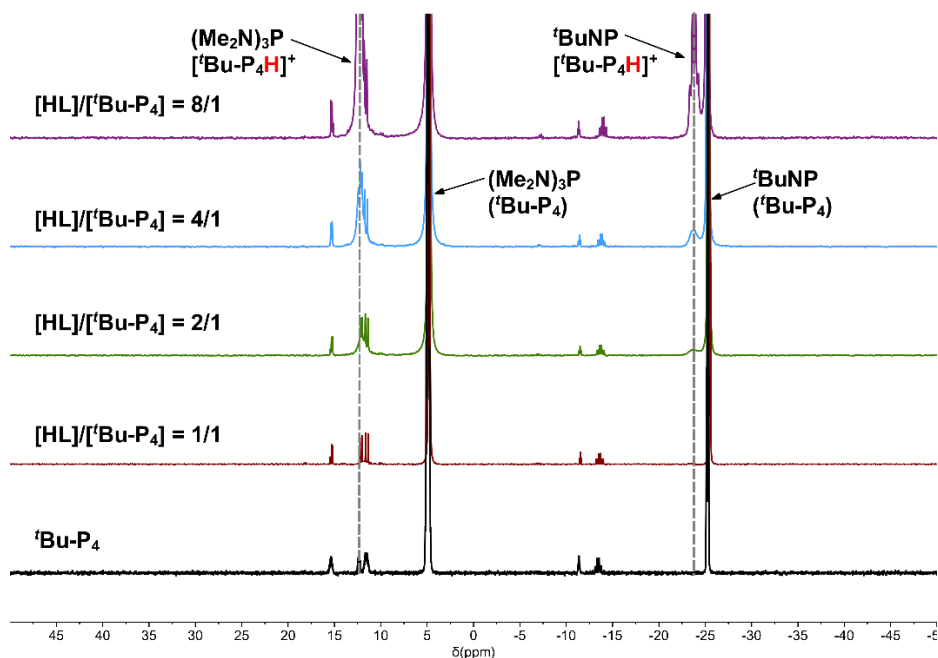

**Figure S18.**  $^{31}\text{P}$  NMR spectrum of the mixture of **HL** and  $^t\text{Bu-P}_4$  in varied feed ratios (toluene- $d_8$ , 25°C, no polymerization took place).

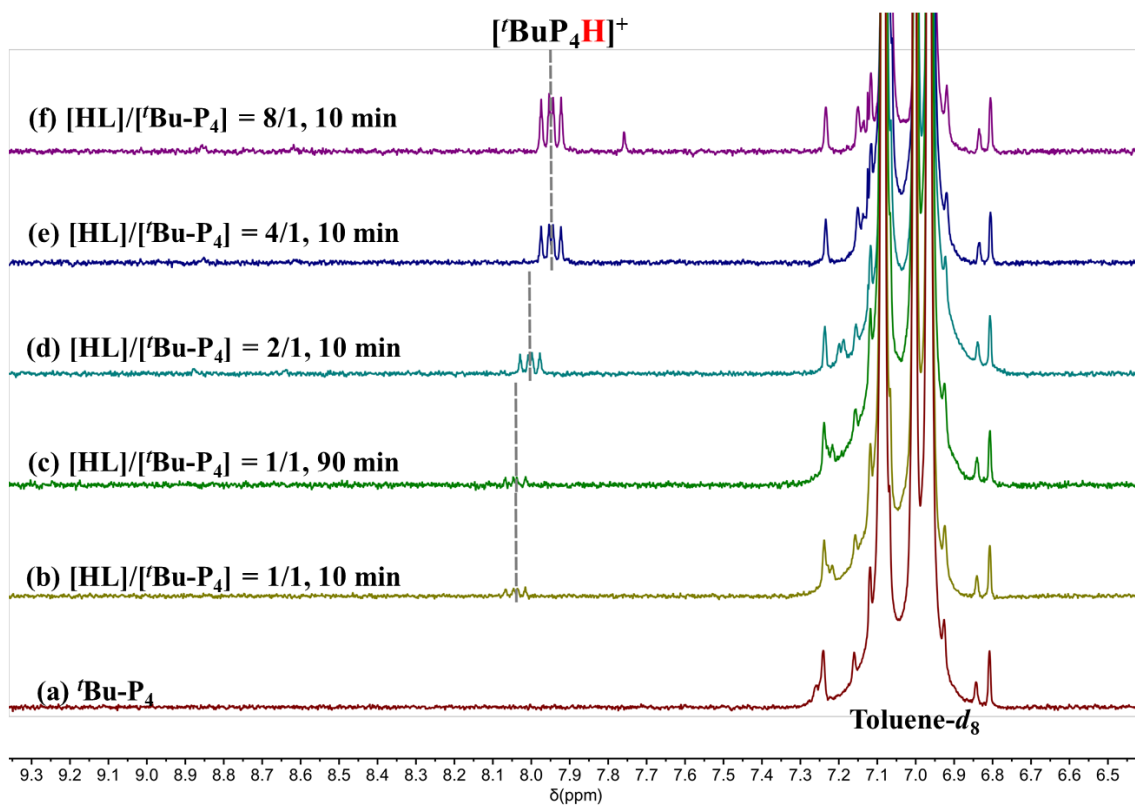

**Figure S19.**  $^1\text{H}$  NMR spectrum ( $\text{toluene-}d_8$ ,  $25^\circ\text{C}$ ) of the reaction between  $\text{tBu-P}_4$  and **HL** at varied feed ratios (partial enlarged view).



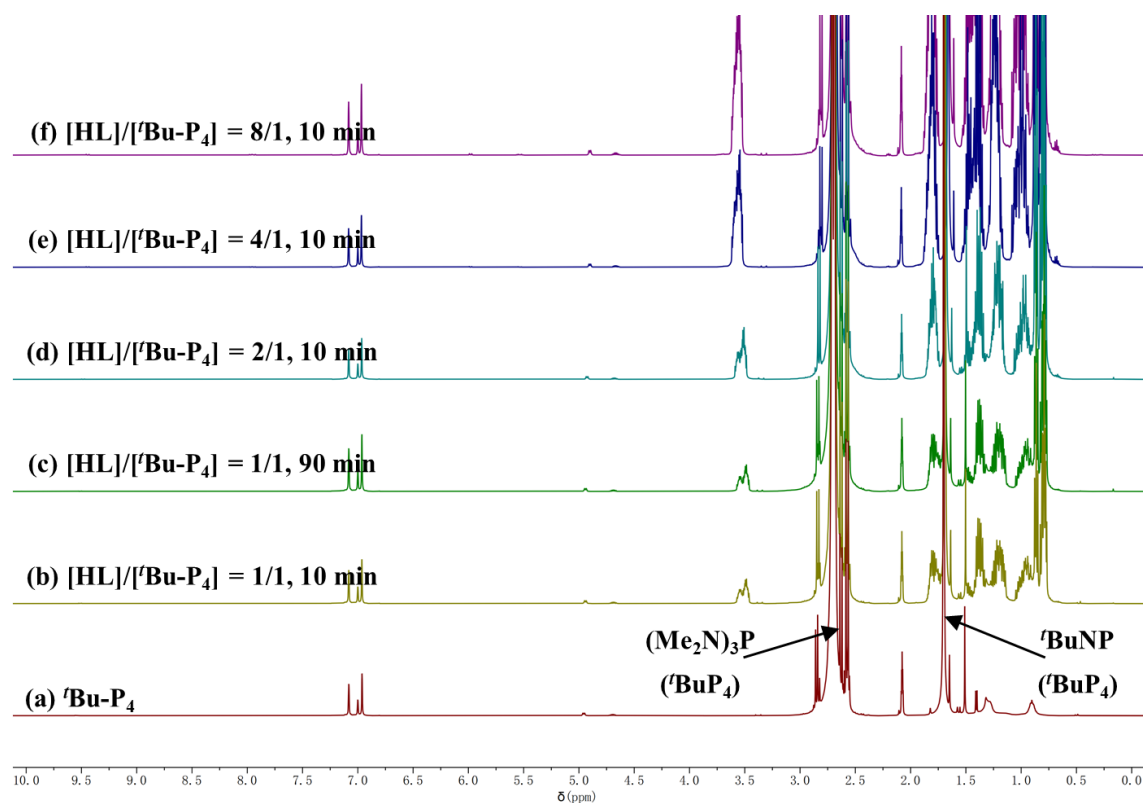

**Figure S20.** <sup>1</sup>H NMR spectrum (toluene-*d*<sub>8</sub>, 25°C) of the reaction between <sup>t</sup>Bu-P<sub>4</sub> and HL at varied feed ratios (overview). At this diluted reaction condition, no polymerization was detected.

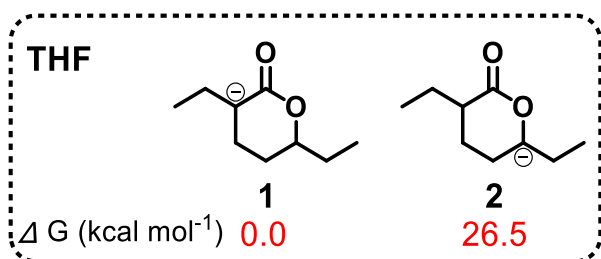

**Figure S21.** Deprotonation energies of HL calculated by DFT calculations.

6-311+g\*\* solvent: tetrahydrofuran

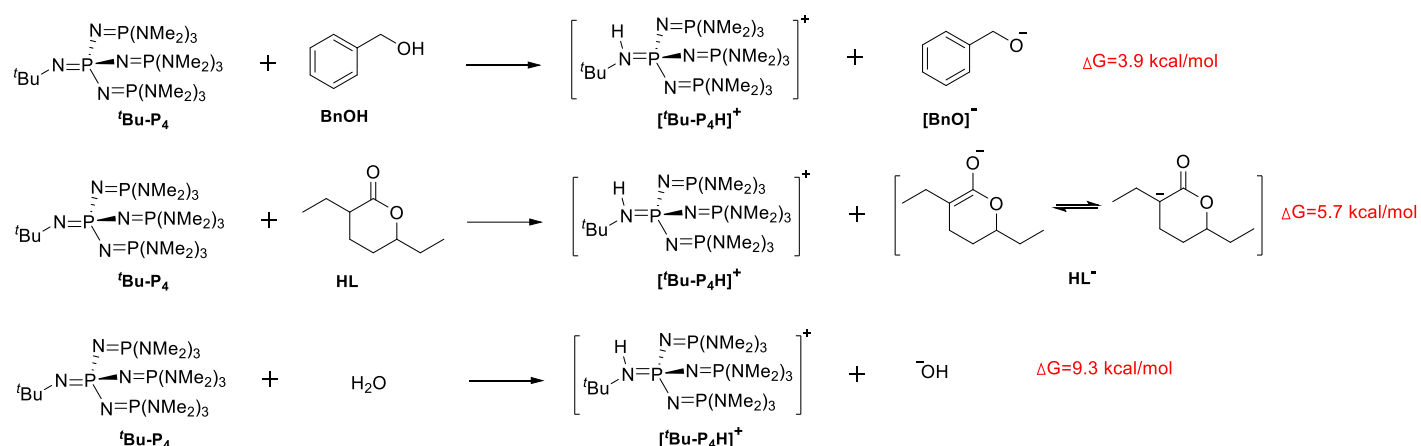

**Figure S22.** Calculated free energy of deprotonation reactions of BnOH, HL and water by  $t\text{Bu-P}_4$ .

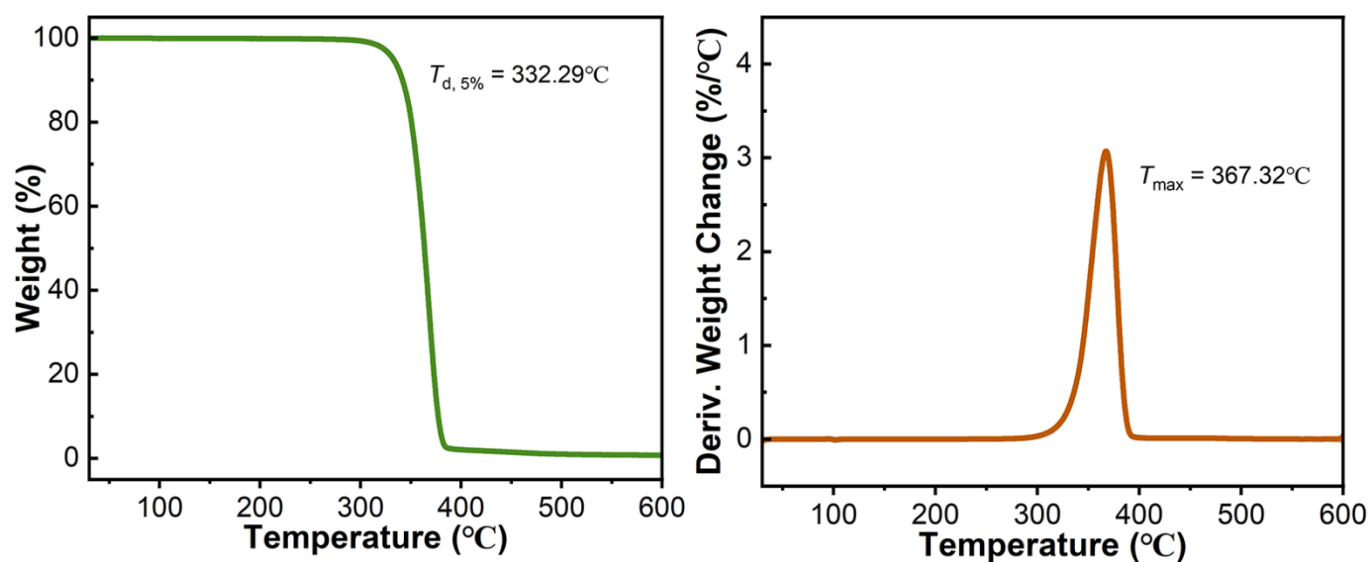

**Figure S23.** TGA and DTG of cyclic polyHL produced by  $t\text{Bu-P}_4$  alone at a ratio of  $[\text{HL}]/[t\text{Bu-P}_4] = 10/1$  at  $-25^\circ\text{C}$  for 30 min.  $M_n = 21.7 \text{ kg mol}^{-1}$ ,  $D = 1.13$ .

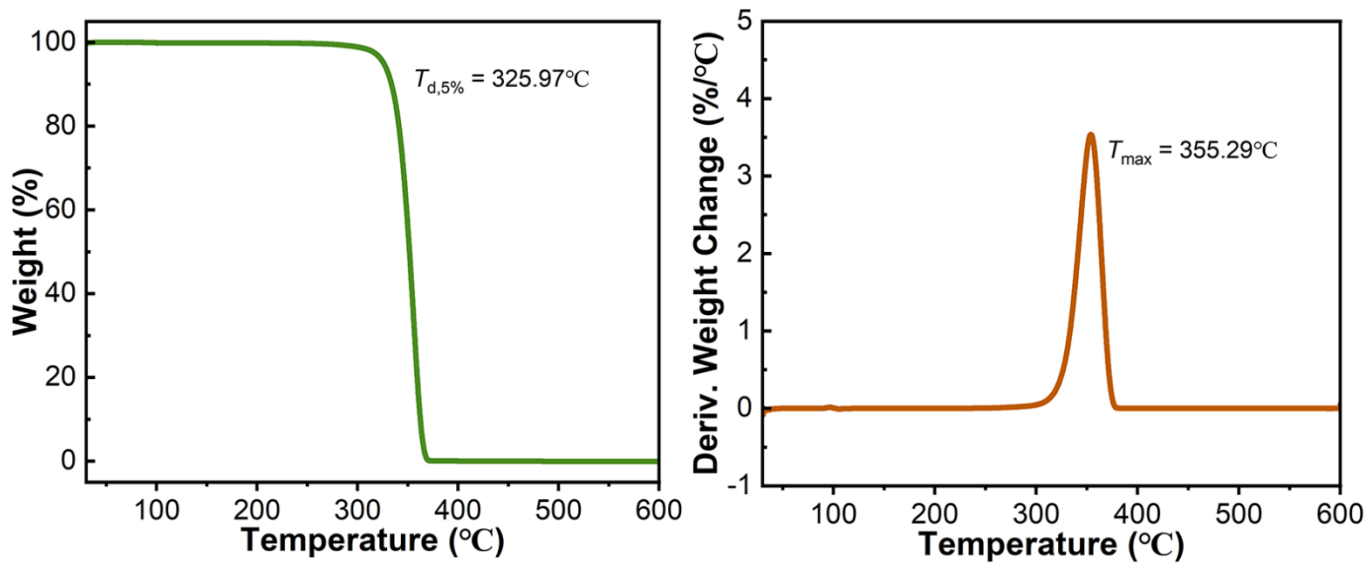

**Figure S24.** TGA and DTG of linear polyHL produced by  $t\text{Bu-P}_4$  at a ratio of  $[\text{HL}]/[t\text{Bu-P}_4]/[\text{BnOH}] = 100/0.2/1$  at  $-25^\circ\text{C}$  for 12 h.  $M_n = 19.6 \text{ kg mol}^{-1}$ ,  $\mathcal{D} = 1.08$  (Table 1, run 15).

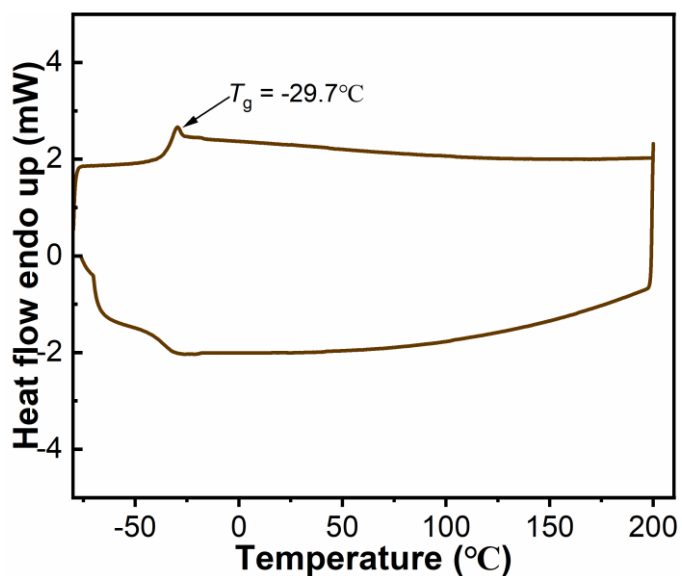

**Figure S25.** DSC curves of cyclic polyHL produced by  $t\text{Bu-P}_4$  alone at a ratio of  $[\text{HL}]/[t\text{Bu-P}_4] = 10/1$  at  $-25^\circ\text{C}$  for 30 min.

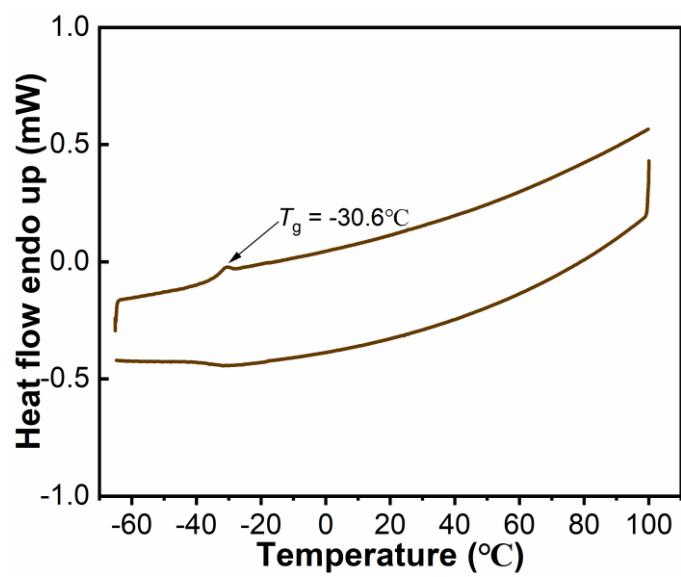

**Figure S26.** DSC curves of linear polyHL produced by <sup>t</sup>Bu-P<sub>4</sub> at a ratio of [HL]/[<sup>t</sup>Bu-P<sub>4</sub>]/[BnOH] = 100/0.2/1 at -25°C for 12 h.  $M_n = 19.6 \text{ kg mol}^{-1}$ ,  $D = 1.08$  (Table 1, run 15).

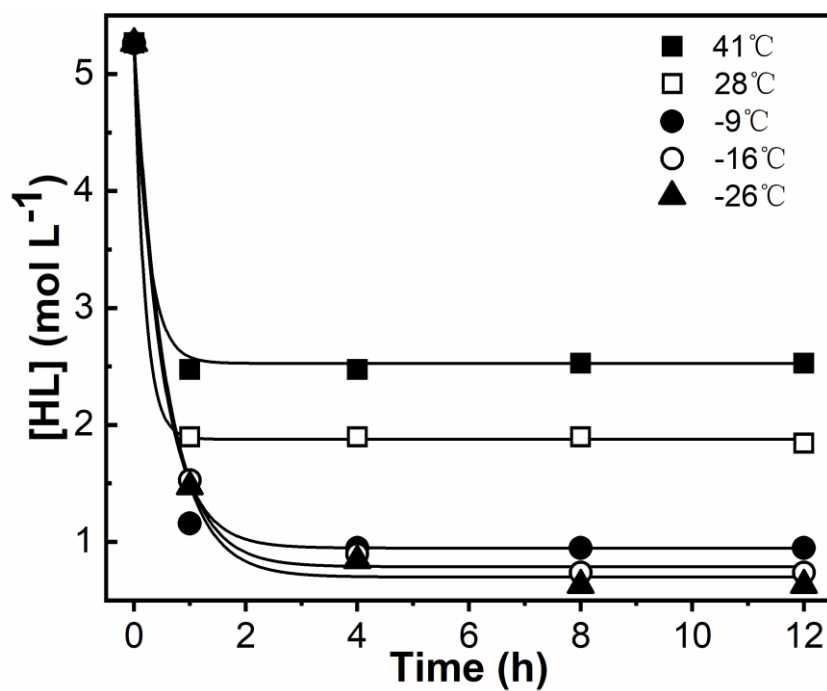

**Figure S27.** Plot of **HL** monomer concentration as a function of time during ROP at different temperatures. Conditions: **HL** = 0.104 g,  $[\text{HL}]/[\text{'Bu-P}_4]/[\text{BnOH}] = 50/0.1/1$ ,  $[\text{HL}]_0 = 5.3 \text{ M}$  in THF.

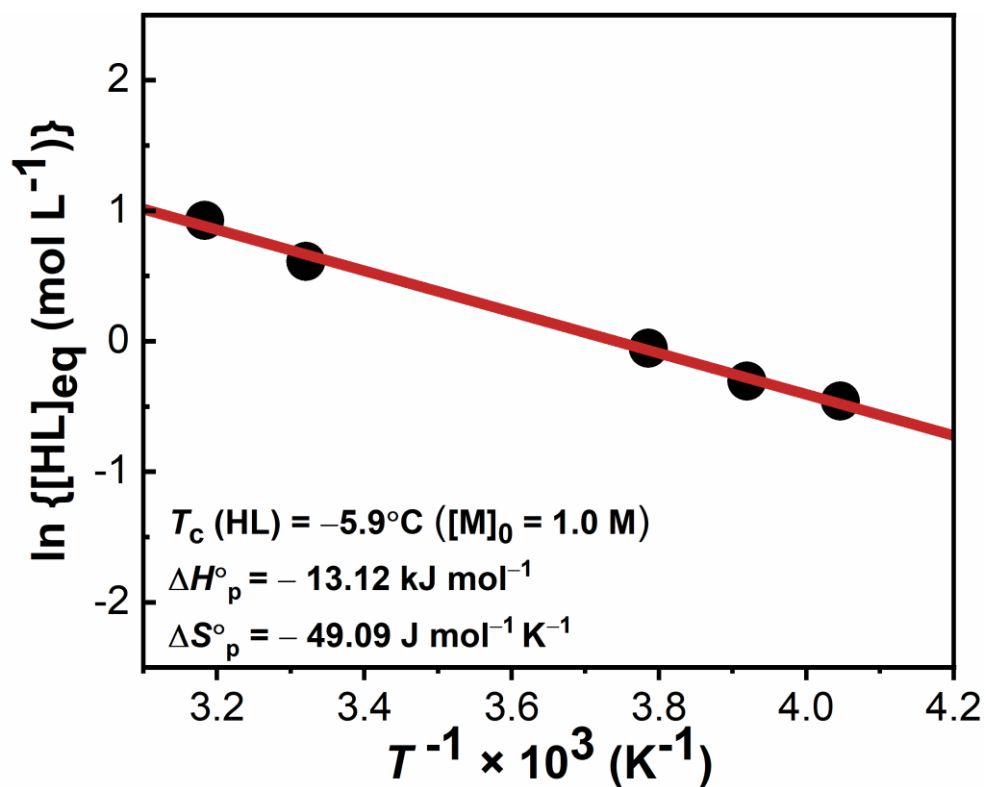

**Figure S28.** Van't Hoff plot of  $\ln[\text{HL}]_{\text{eq}}$  versus the reciprocal of the absolute temperature ( $T^{-1}$ ).

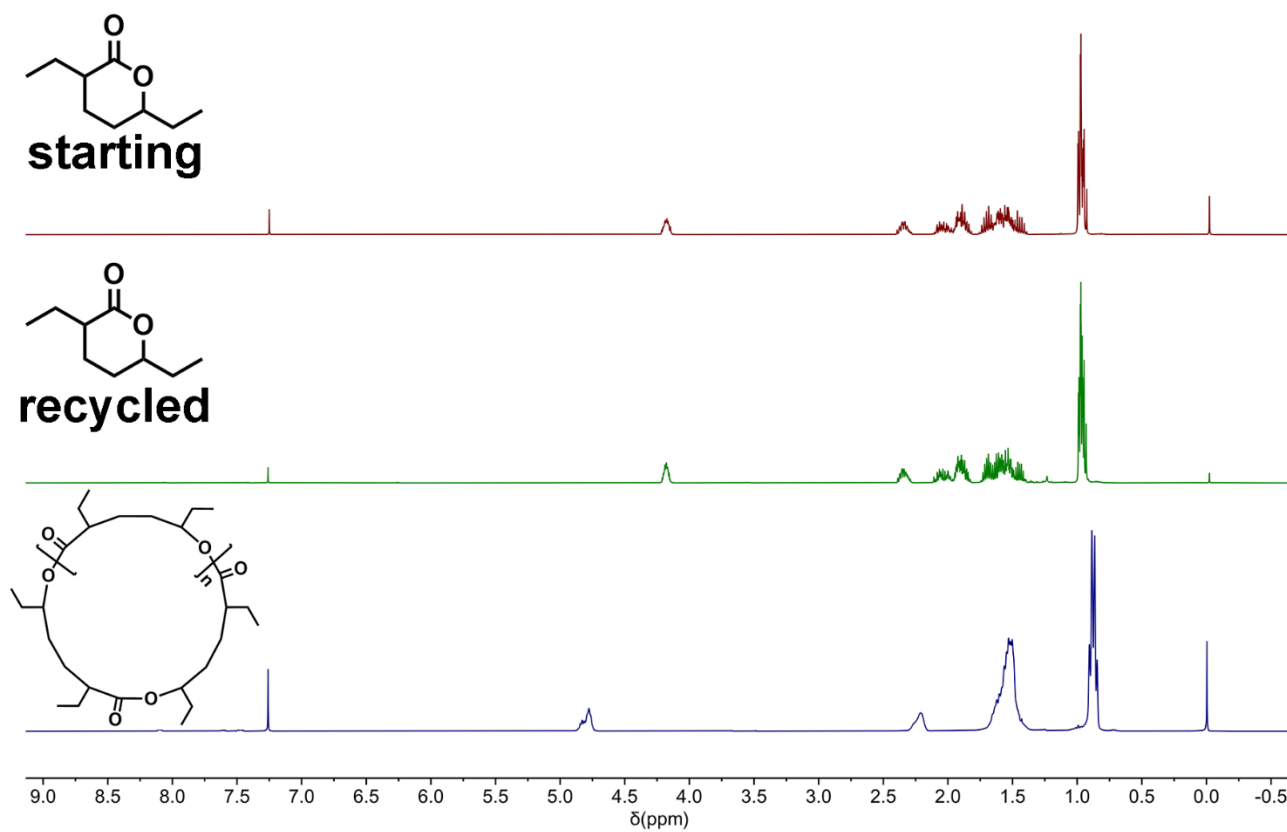

**Figure S29.** The <sup>1</sup>H NMR spectra of chemical recycling of high MW *cyclic-polyHL* by 3 mol% of La[N(SiMe<sub>3</sub>)<sub>2</sub>]<sub>3</sub> (Table S9, run 9). Bottom (blue), high MW *cyclic-polyHL* synthesized by <sup>t</sup>BuP<sub>4</sub> alone; middle (green), the colorless oil generated after purification; top (red), clean **HL** monomer employed for comparison.

**a**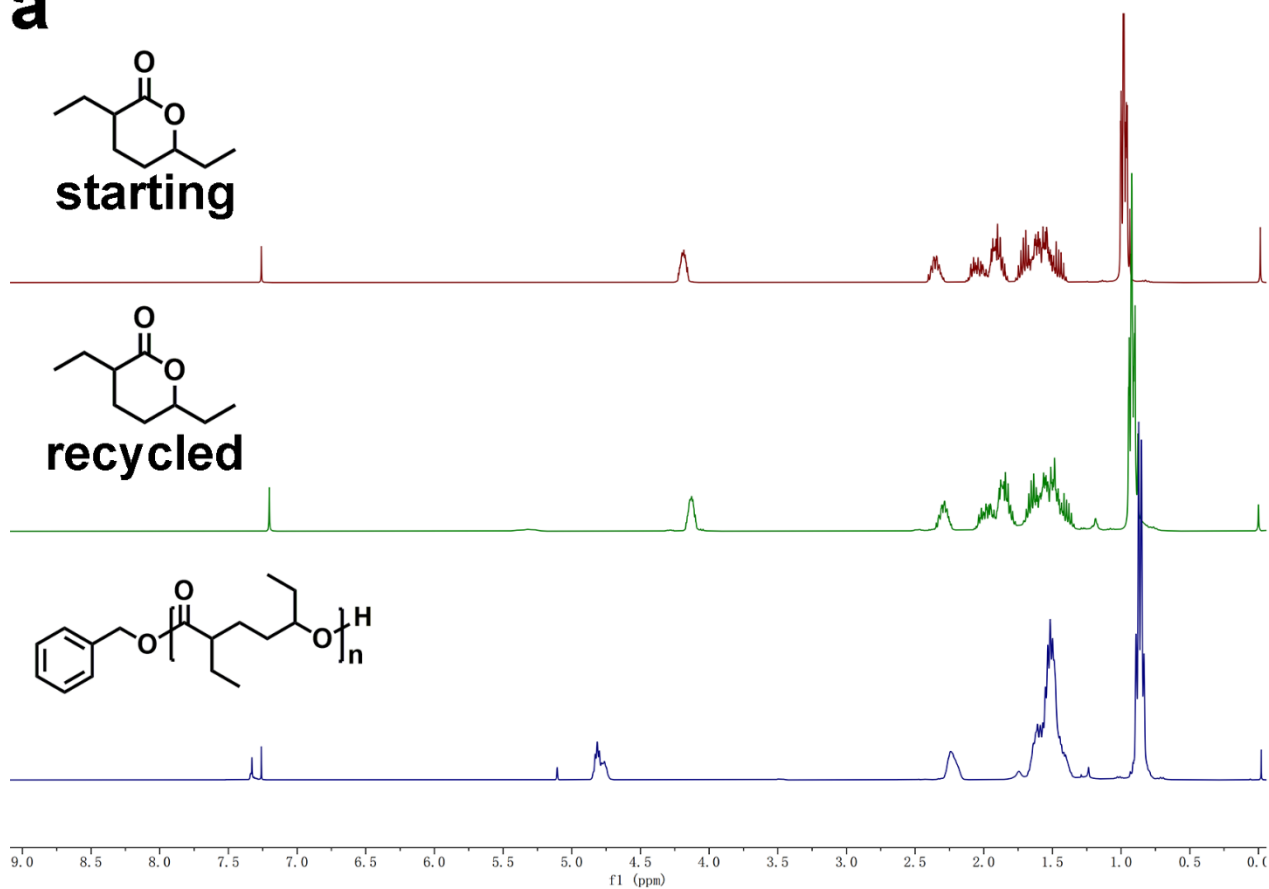

**Figure S30.** The <sup>1</sup>H NMR spectra of chemical recycling of linear poly**HL** by 5 mol% of ZnCl<sub>2</sub> at 160°C in *o*-DCB. Bottom (blue), linear poly**HL** synthesized by <sup>t</sup>BuP<sub>4</sub>/BnOH at a ratio of 50/0.1/1 at -25°C in THF,  $M_n = 9.2 \text{ kg mol}^{-1}$ ,  $\mathcal{D} = 1.08$ ; middle (green), the colorless oil generated after purification; top (red), clean **HL** monomer employed for comparison.

---

**Cartesian coordinates for 'Bu-P<sub>4</sub>.**

|   |             |             |             |
|---|-------------|-------------|-------------|
| P | 0.01534200  | 0.00120800  | 0.60077100  |
| N | 0.21707300  | 0.54837000  | 2.07492500  |
| C | -0.26595700 | 0.02134200  | 3.34782700  |
| C | 0.69486300  | 0.52638200  | 4.44902800  |
| C | -1.67468000 | 0.58181300  | 3.66274700  |
| C | -0.32298400 | -1.52401800 | 3.42848200  |
| H | 1.70178900  | 0.11647300  | 4.30496100  |
| H | 0.76737200  | 1.61975900  | 4.40685800  |
| H | 0.34724100  | 0.23847900  | 5.45104600  |
| H | -2.37736100 | 0.29095900  | 2.87669500  |
| H | -2.05648800 | 0.21549200  | 4.62722600  |
| H | -1.64272500 | 1.67748900  | 3.70244200  |
| H | -0.64188900 | -1.85585000 | 4.42676000  |
| H | -1.02776700 | -1.92898600 | 2.69366600  |
| H | 0.66180100  | -1.95833300 | 3.22425700  |
| N | 0.88421500  | -1.37367300 | 0.21096800  |
| P | 2.22949800  | -1.93247600 | -0.31592000 |
| N | 2.67741300  | -1.74865900 | -1.95395200 |
| N | 3.61337200  | -1.30433900 | 0.46242500  |
| N | 2.14869200  | -3.63317200 | -0.20377800 |
| N | 0.50393200  | 1.17764400  | -0.48432000 |
| N | -1.53448200 | -0.43145600 | 0.21222700  |
| P | -2.87191600 | -0.88240100 | -0.38963300 |
| P | 0.67579300  | 2.73900700  | -0.41463900 |
| N | 1.25799300  | 3.35276500  | -1.89871100 |
| N | -3.30289300 | 0.04215300  | -1.75888900 |
| N | -2.92194700 | -2.55508800 | -0.71136100 |



---

|   |             |             |             |
|---|-------------|-------------|-------------|
| N | 1.77229900  | 3.27957200  | 0.74143300  |
| N | -0.74125400 | 3.64810800  | -0.24201700 |
| N | -4.28805600 | -0.71603300 | 0.54153900  |
| C | -1.00260100 | 4.95147800  | -0.83850100 |
| H | -0.22866400 | 5.20188400  | -1.56460200 |
| H | -1.97906400 | 4.94350000  | -1.34632000 |
| H | -1.03774700 | 5.74426300  | -0.07203700 |
| C | -1.68866900 | 3.28709200  | 0.81138500  |
| H | -1.41336900 | 2.33459400  | 1.26711800  |
| H | -1.69894700 | 4.05470700  | 1.60221700  |
| H | -2.70311100 | 3.20829600  | 0.39635900  |
| C | -4.79624300 | 0.63124200  | 0.81329200  |
| H | -5.87823900 | 0.57587900  | 0.99462400  |
| H | -4.32216200 | 1.07807100  | 1.70008200  |
| H | -4.61701100 | 1.28494000  | -0.04148400 |
| C | -4.50495000 | -1.61714200 | 1.67785900  |
| H | -4.04577100 | -1.23312200 | 2.60024800  |
| H | -5.58484500 | -1.72173800 | 1.85047500  |
| H | -4.08594600 | -2.60239100 | 1.46959600  |
| C | -4.55764600 | -0.16439700 | -2.47586300 |
| H | -4.87102700 | 0.78393500  | -2.93518600 |
| H | -4.46326700 | -0.90957100 | -3.28358700 |
| H | -5.34386000 | -0.48813400 | -1.79152800 |
| C | -2.23067000 | 0.53149200  | -2.62100400 |
| H | -1.32805800 | 0.71372700  | -2.03531600 |
| H | -1.99762500 | -0.17917600 | -3.43363900 |
| H | -2.54809700 | 1.47570200  | -3.08567100 |
| C | -1.68174000 | -3.25505000 | -1.03263500 |
| H | -1.54666700 | -3.36076800 | -2.12298800 |

---

|   |             |             |             |
|---|-------------|-------------|-------------|
| H | -0.82559500 | -2.71934000 | -0.61958100 |
| H | -1.71178000 | -4.26567200 | -0.60039600 |
| C | -4.10799600 | -3.22360500 | -1.23653700 |
| H | -4.09211500 | -3.29687200 | -2.33677900 |
| H | -4.15505100 | -4.24705700 | -0.83706700 |
| H | -5.01538600 | -2.69803900 | -0.93453600 |
| C | 1.38980400  | -4.24693200 | 0.88447500  |
| H | 0.59488100  | -3.57518400 | 1.20600800  |
| H | 0.94390500  | -5.18718500 | 0.53109100  |
| H | 2.03091400  | -4.48152400 | 1.75083700  |
| C | 3.22080800  | -4.49226300 | -0.69801200 |
| H | 3.95919200  | -4.73375900 | 0.08442600  |
| H | 2.79023500  | -5.44033200 | -1.05045400 |
| H | 3.73862200  | -4.02034200 | -1.53456200 |
| C | 1.78253200  | -2.35818200 | -2.94508300 |
| H | 0.89148600  | -1.73843300 | -3.13045100 |
| H | 2.32768600  | -2.47175800 | -3.89095200 |
| H | 1.45518800  | -3.34324300 | -2.60886900 |
| C | 3.12851200  | -0.42379100 | -2.39923100 |
| H | 2.28500300  | 0.26753400  | -2.52807000 |
| H | 3.81688800  | 0.01093700  | -1.67362700 |
| H | 3.65209800  | -0.53649000 | -3.35770300 |
| C | 4.96109900  | -1.74943500 | 0.10578100  |
| H | 5.67450100  | -0.94113200 | 0.31741000  |
| H | 5.27568600  | -2.63214000 | 0.68660400  |
| H | 5.02049300  | -1.99202100 | -0.95639900 |
| C | 3.49337100  | -0.98682600 | 1.88928700  |
| H | 4.25229000  | -0.23735800 | 2.14902300  |
| H | 2.50811900  | -0.56921600 | 2.10570100  |

---

|   |             |             |             |
|---|-------------|-------------|-------------|
| H | 3.66531800  | -1.87280200 | 2.52432300  |
| C | 2.84674700  | 2.42916600  | 1.23935200  |
| H | 2.66777500  | 2.15889300  | 2.28684700  |
| H | 2.89732600  | 1.50732300  | 0.66087000  |
| H | 3.81169800  | 2.95623000  | 1.15845000  |
| C | 1.67089900  | 4.55804200  | 1.42787100  |
| H | 2.58196200  | 5.15913800  | 1.27584100  |
| H | 0.81979100  | 5.13363200  | 1.06348500  |
| H | 1.54361400  | 4.40221400  | 2.50981900  |
| C | 2.69281700  | 3.51730600  | -2.11124600 |
| H | 3.18495300  | 2.58523800  | -2.43395400 |
| H | 2.85236700  | 4.27181700  | -2.89311600 |
| H | 3.17289600  | 3.86615600  | -1.19539700 |
| C | 0.54412400  | 2.97570900  | -3.11716600 |
| H | 0.74400400  | 3.72213500  | -3.89804600 |
| H | 0.85033100  | 1.98730100  | -3.49447700 |
| H | -0.53170200 | 2.95132100  | -2.93333600 |

Cartesian coordinates for  $[\text{tBu-P}_4\text{H}]^+$

|   |             |             |            |
|---|-------------|-------------|------------|
| P | -0.00336600 | -0.06395200 | 0.49834500 |
| N | 0.22546600  | 0.38934500  | 2.11915000 |
| C | -0.45495700 | -0.08509700 | 3.35673500 |
| C | 0.48189900  | 0.24620100  | 4.53399400 |
| C | -1.79485200 | 0.65152000  | 3.55383300 |
| C | -0.68535800 | -1.60250000 | 3.30415700 |
| H | 1.43268300  | -0.29000300 | 4.44461500 |
| H | 0.69734900  | 1.32192700  | 4.57700700 |
| H | 0.01692300  | -0.03449600 | 5.48591800 |
| H | -2.45475800 | 0.47526600  | 2.70122700 |

---

|   |             |             |             |
|---|-------------|-------------|-------------|
| H | -2.29986800 | 0.31164300  | 4.46630700  |
| H | -1.63241000 | 1.73302700  | 3.64584100  |
| H | -1.14291600 | -1.93435500 | 4.24278500  |
| H | -1.35340200 | -1.88072400 | 2.48396400  |
| H | 0.26016400  | -2.13829400 | 3.17750000  |
| N | 0.78627700  | -1.45336500 | 0.24010400  |
| P | 2.10401800  | -2.10514500 | -0.31412200 |
| N | 2.52861500  | -1.89104700 | -1.93351500 |
| N | 3.49836000  | -1.55564900 | 0.48892700  |
| N | 1.88711000  | -3.77760800 | -0.22014100 |
| N | 0.62109000  | 1.16567700  | -0.37826000 |
| N | -1.56834300 | -0.30441400 | 0.20946200  |
| P | -2.94057100 | -0.65324100 | -0.44731300 |
| P | 0.91639100  | 2.71535500  | -0.34764200 |
| N | 1.67428900  | 3.27052000  | -1.74584000 |
| N | -3.19401600 | 0.28418600  | -1.83849200 |
| N | -3.10775000 | -2.31422000 | -0.70544200 |
| N | 1.89450700  | 3.10050000  | 0.98040000  |
| N | -0.44793500 | 3.69292800  | -0.30281700 |
| N | -4.32489500 | -0.31141100 | 0.44670200  |
| C | -0.49603400 | 5.07734700  | -0.78432400 |
| H | 0.41786300  | 5.32992300  | -1.32159300 |
| H | -1.35080500 | 5.20190700  | -1.46241800 |
| H | -0.62426900 | 5.78223300  | 0.05008000  |
| C | -1.59550700 | 3.33696700  | 0.53217900  |
| H | -1.63024400 | 2.26254600  | 0.71059500  |
| H | -1.57319100 | 3.86461500  | 1.49792000  |
| H | -2.51811000 | 3.62067800  | 0.01139300  |
| C | -4.78437700 | 1.07057300  | 0.61726100  |

---

|   |             |             |             |
|---|-------------|-------------|-------------|
| H | -5.88036800 | 1.08195800  | 0.66834100  |
| H | -4.39597700 | 1.51267300  | 1.54653400  |
| H | -4.46750900 | 1.68679000  | -0.22420700 |
| C | -4.73970900 | -1.17667700 | 1.55783100  |
| H | -4.40578000 | -0.77449400 | 2.52416800  |
| H | -5.83506100 | -1.24202500 | 1.57565700  |
| H | -4.33043800 | -2.17984100 | 1.43883000  |
| C | -4.44528500 | 0.18077000  | -2.59807600 |
| H | -4.63594200 | 1.13748400  | -3.10020200 |
| H | -4.39759200 | -0.60208200 | -3.37021400 |
| H | -5.28559900 | -0.03038100 | -1.93572600 |
| C | -2.05220200 | 0.60513800  | -2.69685300 |
| H | -1.15110100 | 0.74568900  | -2.10032600 |
| H | -1.87033700 | -0.17900900 | -3.45015600 |
| H | -2.26579300 | 1.53904400  | -3.23228300 |
| C | -1.93309900 | -3.14017400 | -0.98476600 |
| H | -1.78473000 | -3.27701200 | -2.06799100 |
| H | -1.03828600 | -2.68899200 | -0.55740000 |
| H | -2.07813900 | -4.13200800 | -0.53725500 |
| C | -4.34524700 | -2.89430300 | -1.23747800 |
| H | -4.30503200 | -3.00974000 | -2.33087300 |
| H | -4.49072200 | -3.88974300 | -0.79872900 |
| H | -5.20876000 | -2.27965300 | -0.98068100 |
| C | 1.06851800  | -4.36965700 | 0.84123700  |
| H | 0.32464500  | -3.65265100 | 1.18420400  |
| H | 0.55474300  | -5.25572000 | 0.44727800  |
| H | 1.68332500  | -4.68667200 | 1.69778800  |
| C | 2.89885700  | -4.70597300 | -0.73582900 |
| H | 3.59648400  | -5.03038300 | 0.05047000  |

---

|   |            |             |             |
|---|------------|-------------|-------------|
| H | 2.39666700 | -5.59891000 | -1.12912800 |
| H | 3.46807200 | -4.24883900 | -1.54615100 |
| C | 1.65101700 | -2.46987500 | -2.96014300 |
| H | 0.81698100 | -1.79551800 | -3.20669100 |
| H | 2.23726100 | -2.64081600 | -3.87064100 |
| H | 1.24230200 | -3.42310900 | -2.62345900 |
| C | 3.09855800 | -0.61017400 | -2.37028800 |
| H | 2.31003900 | 0.12344400  | -2.58481100 |
| H | 3.75191200 | -0.19681700 | -1.60210800 |
| H | 3.68581400 | -0.77852400 | -3.28107000 |
| C | 4.82587500 | -2.06126300 | 0.10815300  |
| H | 5.57993900 | -1.30953800 | 0.37144600  |
| H | 5.07834100 | -2.99236800 | 0.63718700  |
| H | 4.88054300 | -2.24355600 | -0.96548300 |
| C | 3.39693700 | -1.34527400 | 1.93984300  |
| H | 4.19793500 | -0.66474300 | 2.25250200  |
| H | 2.43793200 | -0.89294100 | 2.19348100  |
| H | 3.51707200 | -2.28551400 | 2.50137400  |
| C | 3.03171800 | 2.25313600  | 1.36130100  |
| H | 3.04750500 | 2.12900700  | 2.45110300  |
| H | 2.94414000 | 1.26894600  | 0.90116100  |
| H | 3.98861000 | 2.70403800  | 1.05870700  |
| C | 2.00882600 | 4.47268200  | 1.48234300  |
| H | 2.83364000 | 5.02525300  | 1.00650600  |
| H | 1.08091700 | 5.02205400  | 1.32220800  |
| H | 2.20181500 | 4.44061400  | 2.56115500  |
| C | 3.13136100 | 3.35857000  | -1.84842600 |
| H | 3.59137100 | 2.40673400  | -2.15340900 |
| H | 3.38456000 | 4.11529700  | -2.60011500 |

---

|   |             |            |             |
|---|-------------|------------|-------------|
| H | 3.56783600  | 3.67204100 | -0.90011400 |
| C | 1.01690700  | 3.03502900 | -3.03561500 |
| H | 1.28390000  | 3.84199700 | -3.72880200 |
| H | 1.32285200  | 2.07757500 | -3.48180800 |
| H | -0.06778400 | 3.02922600 | -2.91385600 |
| H | 0.48319000  | 1.37070600 | 2.18935900  |

Cartesian coordinates for **BnOH**.

|   |             |             |             |
|---|-------------|-------------|-------------|
| C | -1.87109900 | 1.01343800  | -0.07164100 |
| C | -0.50440000 | 1.29724400  | -0.02316900 |
| C | 0.43850500  | 0.26393000  | 0.06572600  |
| C | -0.00827000 | -1.06270100 | 0.09252300  |
| C | -1.37596500 | -1.34800900 | 0.03674400  |
| C | -2.31173600 | -0.31324300 | -0.04204600 |
| H | -2.58962600 | 1.82645800  | -0.14166800 |
| H | -0.16845400 | 2.33244200  | -0.05804700 |
| H | 0.72006900  | -1.86532800 | 0.14554200  |
| H | -1.70978200 | -2.38277700 | 0.05343300  |
| H | -3.37460300 | -0.53743500 | -0.08575700 |
| C | 1.90909700  | 0.60142600  | 0.17357300  |
| H | 2.15186000  | 0.85454700  | 1.21865800  |
| H | 2.12919900  | 1.48752700  | -0.44072700 |
| O | 2.69466000  | -0.51294300 | -0.25152700 |
| H | 3.62726600  | -0.32439600 | -0.06948400 |

Cartesian coordinates for **BnO<sup>-</sup>**.

|   |             |             |             |
|---|-------------|-------------|-------------|
| O | -2.67055200 | -0.00032700 | 0.77352800  |
| C | -2.06197800 | 0.00030200  | -0.42550000 |
| H | -2.30706800 | -0.89291300 | -1.08161900 |

---

|   |             |             |             |
|---|-------------|-------------|-------------|
| H | -2.30702200 | 0.89421500  | -1.08067600 |
| C | -0.53021600 | 0.00018600  | -0.27943900 |
| C | 0.18771500  | -1.20054400 | -0.15727200 |
| C | 0.18799800  | 1.20071400  | -0.15708400 |
| C | 1.56853800  | -1.20777000 | 0.06744500  |
| H | -0.35774000 | -2.14068600 | -0.23478500 |
| C | 1.56883500  | 1.20757300  | 0.06765300  |
| H | -0.35721300 | 2.14101100  | -0.23447500 |
| C | 2.26980500  | -0.00018600 | 0.18105700  |
| H | 2.10181700  | -2.15512700 | 0.15326800  |
| H | 2.10233300  | 2.15479000  | 0.15365200  |
| H | 3.34512100  | -0.00033100 | 0.35524300  |

Cartesian coordinates for **HL**.

|   |             |             |             |
|---|-------------|-------------|-------------|
| C | 0.56616800  | -1.61374100 | -0.29039900 |
| C | -0.86351400 | -1.37604200 | 0.19525800  |
| C | -1.37713100 | -0.00863300 | -0.28239800 |
| C | -0.34050700 | 1.11656200  | -0.14737700 |
| C | 1.48505100  | -0.52845600 | 0.25323500  |
| H | -0.89007000 | -1.41759400 | 1.29472600  |
| H | -1.52890900 | -2.16904400 | -0.16352200 |
| H | 0.60220600  | -1.61424400 | -1.38946400 |
| H | 0.93810200  | -2.58986900 | 0.04549500  |
| H | 1.51581600  | -0.60045200 | 1.35118600  |
| H | -1.54032900 | -0.07600200 | -1.37161900 |
| O | -0.64433900 | 2.28816000  | -0.21043200 |
| C | -2.71346100 | 0.41400200  | 0.36194100  |
| H | -2.94722600 | 1.42907100  | 0.02784600  |
| H | -2.58041400 | 0.47042700  | 1.45185900  |



---

|   |             |             |             |
|---|-------------|-------------|-------------|
| C | -3.88138000 | -0.52318300 | 0.03171600  |
| H | -4.81303200 | -0.13977900 | 0.46371900  |
| H | -3.73140200 | -1.53508700 | 0.42631400  |
| H | -4.03006400 | -0.60528600 | -1.05320000 |
| O | 0.97702100  | 0.80457200  | -0.04443400 |
| C | 2.91020400  | -0.58359100 | -0.29372900 |
| H | 3.29027900  | -1.59996700 | -0.11891800 |
| H | 2.86827600  | -0.44274900 | -1.38226700 |
| C | 3.85973700  | 0.44300800  | 0.33384400  |
| H | 3.50665100  | 1.46370100  | 0.15863900  |
| H | 4.86514500  | 0.35054300  | -0.09274000 |
| H | 3.94250100  | 0.29492400  | 1.41833100  |

Cartesian coordinates for **HL**:

|   |             |             |             |
|---|-------------|-------------|-------------|
| C | 0.62508400  | -1.63761700 | -0.30343900 |
| C | -0.78757000 | -1.52751400 | 0.28234200  |
| C | -1.29659000 | -0.10786400 | 0.26086300  |
| C | -0.50438500 | 0.99664300  | -0.03375700 |
| C | 1.46020200  | -0.45200000 | 0.18222000  |
| H | -0.77629000 | -1.94579700 | 1.31584400  |
| H | -1.45609000 | -2.20837000 | -0.27934700 |
| H | 0.58532200  | -1.59598800 | -1.40198900 |
| H | 1.10297000  | -2.58910200 | -0.01986000 |
| H | 1.44479800  | -0.45097300 | 1.29119500  |
| O | -0.82324000 | 2.20486900  | -0.12844000 |
| C | -2.74122200 | 0.11188500  | 0.62093600  |
| H | -2.87419600 | 1.15387000  | 0.94029300  |
| H | -3.02196100 | -0.52633000 | 1.48510000  |
| C | -3.75231600 | -0.17355500 | -0.51491200 |

---

|   |             |             |             |
|---|-------------|-------------|-------------|
| H | -4.79568100 | -0.04103400 | -0.17908700 |
| H | -3.65263600 | -1.20241100 | -0.88994200 |
| H | -3.57224300 | 0.50684600  | -1.35642700 |
| O | 0.90491000  | 0.76421300  | -0.28760100 |
| C | 2.91924500  | -0.50368900 | -0.28395000 |
| H | 3.35642400  | -1.45955200 | 0.04522000  |
| H | 2.92826800  | -0.50788100 | -1.38390500 |
| C | 3.76747800  | 0.66450900  | 0.23239300  |
| H | 3.32942000  | 1.61701000  | -0.08161300 |
| H | 4.79881200  | 0.60836400  | -0.14389600 |
| H | 3.81017100  | 0.66390400  | 1.33056800  |

Cartesian coordinates for **H<sub>2</sub>O**.

|   |            |             |             |
|---|------------|-------------|-------------|
| O | 0.00000000 | 0.00000000  | 0.11729100  |
| H | 0.00000000 | 0.77129900  | -0.46916500 |
| H | 0.00000000 | -0.77129900 | -0.46916500 |

Cartesian coordinates for **HO<sup>•</sup>**.

|   |            |            |             |
|---|------------|------------|-------------|
| O | 0.00000000 | 0.00000000 | 0.10831900  |
| H | 0.00000000 | 0.00000000 | -0.86655200 |

---

## Reference

1. Sharif, M., Jackstell, R., Dastgir, S., et al. (2017). Efficient and selective Palladium-catalyzed Telomerization of 1,3-Butadiene with Carbon Dioxide. *Chemcatchem* **9**, 542-546, <https://doi.org/10.1002/cctc.201600760>.
2. Save, M., Schappacher, M., and Soum, A. (2002). Controlled Ring-Opening Polymerization of Lactones and Lactides Initiated by Lanthanum Isopropoxide, 1. General Aspects and Kinetics. *Macromol. Chem. Phys.* **203**, 889-899, [https://doi.org/10.1002/1521-3935\(20020401\)203:5/6](https://doi.org/10.1002/1521-3935(20020401)203:5/6).
3. Schneiderman, D.K., and Hillmyer, M.A. (2016). Aliphatic Polyester Block Polymer Design. *Macromolecules* **49**, 2419-2428, 10.1021/acs.macromol.6b00211.
